# Supplementary material for: Proteomic Profiling of Human Keratinocytes Undergoing UVB-Induced Alternative Differentiation Reveals TRIpartite Motif Protein 29 as a Survival Factor
Source: PubMed Central journal article supplement (PMC2862717; doi:10.1371/journal.pone.0010462), 2010-05-03
Supplement: pone.0010462.s003.pdf [file pone.0010462.s003.pdf]

Table S1

Table S1. Proteins identified as differentially abundant in UVB-treated N-hTERT keratinocytes.

| Spot Number                                                                 | ratio UVB/CTL (t-test) |      |      |       |       | Protein identification                         | 16h           | 40h           | 64h            | accession number       | Mascot score  | Nb of peptides | seq cov %  |
|-----------------------------------------------------------------------------|------------------------|------|------|-------|-------|------------------------------------------------|---------------|---------------|----------------|------------------------|---------------|----------------|------------|
|                                                                             | 16h                    | 40h  | 64h  | PM    | pI    |                                                |               |               |                |                        |               |                |            |
| <b>Cell Cycle</b>                                                           |                        |      |      |       |       |                                                |               |               |                |                        |               |                |            |
| 1                                                                           | 360                    |      |      | 81.8  | 6.1   | minichromosome maintenance complex component 7 | -1.7 (0.047)  |               |                | AAH13375               | 381           | 9              | 14         |
| 2                                                                           |                        |      | 1362 | 24.4  | 4.7   | SFN protein = 14-3-3 protein sigma             |               |               | 1.51 (0.022)   | P31947                 | 361           | 9              | 39         |
| 3                                                                           |                        | 1320 |      | 29    | 4.6   | proliferating cell nuclear antigen             |               |               | -1.59 (0.045)  | AAH00491               | 273           | 9              | 34         |
| <b>Cytoskeleton, cytoskeletal associated protein and structural protein</b> |                        |      |      |       |       |                                                |               |               |                |                        |               |                |            |
| 4                                                                           | 528                    | 725  |      | 62.7  | 6     | dihydropyrimidinase-related protein 2 *        | -2.73 (0.021) | -1.64 (0.039) |                | Q16555                 | 67            | 3              | 4          |
| 5                                                                           | 518                    |      |      | 62.7  | 6     | dihydropyrimidinase-related protein 2          | -1.75 (0.047) |               |                | Q16555                 | 70            | 2              | 3          |
| 6                                                                           | 575                    |      |      | 62.7  | 6     | dihydropyrimidinase-related protein 2          | -1.87 (0.037) |               |                | Q16555                 | 167           | 4              | 7          |
| 7                                                                           |                        |      | 740  | 62.7  | 6     | dihydropyrimidinase-related protein 2          |               |               | -1.69 (0.032)  | Q16555                 | 41            | 1              | 1          |
| 8                                                                           | 541                    |      |      | 66    | 5.1   | lamin B1 *                                     | -1.75 (0.021) |               |                | P20700                 | 961           | 26             | 37         |
| 9                                                                           |                        |      | 693  | 66    | 5.1   | lamin B1                                       |               |               | -2.7 (0.038)   | P20700                 | 480           | 15             | 27         |
| 10                                                                          |                        |      | 689  | 66    | 5.1   | lamin B1                                       |               |               | -2.31 (0.037)  | P20700                 | 490           | 15             | 25         |
| 11                                                                          | 1019                   | 1180 | 1127 | 38.7  | 5.9   | macrophage capping protein (CapG)              | 1.57 (0.021)  | 1.74 (0.018)  | 1.56 (0.037)   | P40121                 | 767           | 8              | 20         |
| 12                                                                          | 783                    |      |      | 53.5  | 5.5   | cytokeratin-8                                  | 1.55 (0.044)  |               |                | P05787                 | 1182          | 26             | 45         |
| 13                                                                          | 715                    |      |      | 53-60 | 5.5-8 | cytokeratin 8 and 6A *                         | 1.69 (0.031)  |               |                | P05787, AAH08807       | 286, 97       | 4, 5, 5        | 11, 9, 9   |
| 14                                                                          | 866                    |      |      | 48    | 5     | cytokeratin 17                                 | 1.65 (0.025)  |               |                | Q04695                 | 2702          | 28             | 52         |
| 15                                                                          |                        | 1063 |      | 48-52 | 5-5.1 | cytokeratin 17 and 14                          |               | 1.81 (0.044)  |                | Q04695, P02533         | 1278, 633     | 23, 15         | 45, 28     |
| 16                                                                          | 854                    |      |      | 48-52 | 5-5.1 | cytokeratin 17 and 14                          | 1.6 (0.021)   |               |                | Q04695, P02533         | 1487, 792     | 21, 12         | 39, 20     |
| 17                                                                          |                        | 1054 | 1026 | 48-52 | 5-5.1 | cytokeratin 17 and 14                          |               | 2 (0.039)     | 1.66 (0.027)   | Q04695, P02533         | 1195, 728     | 23, 14         | 43, 22     |
| 18                                                                          |                        |      | 986  | 48-62 | 5-5.1 | cytokeratin 17 and 14 and 16                   |               |               | 1.58 (0.0091)  | Q04695, P02533, P08779 | 751, 523, 223 | 19, 14, 10     | 40, 26, 17 |
| 19                                                                          |                        | 1046 |      | 48-52 | 5-5.1 | cytokeratin 17 and 14                          |               | 1.69 (0.035)  |                | Q04695 and P02533      | 932, 400      | 24, 13         | 47, 22     |
| 20                                                                          | 821                    |      |      | 48-52 | 4.7-5 | cytokeratin 14 and 17                          | 1.71 (0.038)  |               |                | P02533, Q04695         | 565, 147      | 14, 8          | 28, 17     |
| 21                                                                          |                        | 1023 |      | 52    | 5.1   | cytokeratin 14                                 |               | 1.53 (0.018)  |                | P02533, P08779         | 2093          | 26             | 46         |
| 22                                                                          |                        | 970  | 913  | 60-62 | 5.2-8 | cytokeratin 5 and 6F *                         |               | 1.77 (0.043)  | 1.61 (0.038)   | P13647, P48669         | 316, 105      | 16, 7          | 25, 10     |
| 23                                                                          |                        |      | 882  | 60    | 8     | cytokeratin 6A *                               |               |               | 1.52 (0.0091)  | AAH08807               | 1259          | 23             | 44         |
| 24                                                                          |                        |      | 870  | 60    | 8     | cytokeratin 6A                                 |               |               | 1.54 (0.022)   | AAH08807               | 662           | 19             | 34         |
| 25                                                                          |                        |      | 862  | 60    | 8     | cytokeratin 6A                                 |               |               | 1.58 (0.022)   | AAH14152               | 427           | 15             | 29         |
| 26                                                                          |                        |      | 871  | 60    | 8     | cytokeratin 6A *                               |               |               | 1.69 (0.022)   | AAH08807               | 602           | 19             | 32         |
| 27                                                                          |                        | 1525 | 1465 | 17    | 5.6   | stathmin 1                                     |               | -1.78 (0.02)  | -2.39 (0.0091) | AAH82228               | 79            | 3              | 20         |
| 28                                                                          |                        | 292  |      | 140   | 5.3   | dynactin 1                                     |               | 1.56 (0.02)   |                | AAD03694               | 343           | 12             | 9          |
| 29                                                                          |                        |      | 418  | 102   | 5.5   | coronin-7                                      |               |               | 1.52 (0.038)   | P57737                 | 56            | 1              | 1          |
| <b>Stress defense and DNA repair</b>                                        |                        |      |      |       |       |                                                |               |               |                |                        |               |                |            |
| 30                                                                          | 1302                   |      |      | 22.8  | 6     | heat shock 27 kDa protein (Phospho S82)        | 1.69 (0.041)  |               |                | P04792                 | 375           | 6              | 24         |
| 31                                                                          | 239                    | 442  |      | 95.4  | 5.6   | osmotic stress protein 94                      | 1.75 (0.039)  | 1.64 (0.013)  |                | O95757                 | 593           | 11             | 14         |
| 32                                                                          | 1319                   |      |      | 26.8  | 5.4   | glutathione S-transferase Mu 3                 | 1.84 (0.03)   |               |                | P21266                 | 184           | 6              | 22         |
| 33                                                                          |                        | 699  |      | 70    | 5.5   | HSP70-2                                        |               | 1.54 (0.017)  |                | AAD21815               | 159           | 6              | 7          |
| 34                                                                          |                        | 1480 |      | 23.4  | 5.4   | glutathione S-transferase P (class-pi)         |               | 1.55 (0.044)  |                | P09211                 | 55            | 1              | 4          |
| 35                                                                          | 539                    |      |      | 66.5  | 6.7   | tripartite motif-containing 29                 | 1.83 (0.031)  |               |                | AAH17352               | 366           | 12             | 22         |
| 36                                                                          | 525                    |      |      | 66.5  | 6.7   | tripartite motif-containing 29                 | 1.92 (0.021)  |               |                | AAH17352               | 304           | 11             | 20         |
| 37                                                                          | 532                    |      |      | 66.5  | 6.7   | tripartite motif-containing 29                 | 1.94 (0.03)   |               |                | AAH17352               | 325           | 13             | 23         |

Table S1

|                                                                           |      |      |      |                                                             |                                                            |                            |               |               |              |        |     |    |    |
|---------------------------------------------------------------------------|------|------|------|-------------------------------------------------------------|------------------------------------------------------------|----------------------------|---------------|---------------|--------------|--------|-----|----|----|
| 38                                                                        | 445  | 105  | 5.6  | DNA mismatch repair protein                                 | -1.82 (0.035)                                              |                            | I64819        | 115           | 4            | 3      |     |    |    |
| <b>Protease inhibitor</b>                                                 |      |      |      |                                                             |                                                            |                            |               |               |              |        |     |    |    |
| 39                                                                        | 967  | 46.9 | 5.5  | plasminogen activator inhibitor type 2 protein *            | 1.93 (0.021)                                               |                            | AAA36413      | 769           | 11           | 29     |     |    |    |
| 40                                                                        | 1118 | 44   | 5.5  | plasminogen activator inhibitor type 2 protein              |                                                            | 1.8 (0.013)                | CAA01536      | 82            | 3            | 7      |     |    |    |
| 41                                                                        | 1001 | 1149 | 1092 | plasminogen activator inhibitor 2 precursor                 | 2.3 (0.039)                                                | 2.23 (0.021)               | 2.27 (0.033)  | P05120        | 561          | 10     | 19  |    |    |
| 42                                                                        | 1145 | 44.2 | 5.5  | plasminogen activator inhibitor type 2 protein *            |                                                            | 2 (0.018)                  | CAA01536      | 245           | 4            | 12     |     |    |    |
| 43                                                                        | 1214 | 1159 | 42.5 | maspin (protease inhibitor 5)                               | 1.57 (0.013)                                               | 1.65 (0.022)               | P36952        | 201           | 10           | 18     |     |    |    |
| <b>Metabolism</b>                                                         |      |      |      |                                                             |                                                            |                            |               |               |              |        |     |    |    |
| 44                                                                        | 970  | 913  | 53   | 5.7                                                         | CNDP dipeptidase 2 *                                       | 1.77 (0.043)               | 1.61 (0.038)  | AAH01375      | 84           | 3      | 7   |    |    |
| 45                                                                        | 1145 | 38.4 | 5.4  | activator of 90 kDa heat shock protein ATPase homolog 1*    | 2 (0.018)                                                  |                            | O95433        | 281           | 10           | 24     |     |    |    |
| 46                                                                        |      | 882  | 57.2 | 6.3                                                         | D-3-phosphoglycerate dehydrogenase*                        |                            | 1.52 (0.0091) | O43175        | 269          | 6      | 12  |    |    |
| 47                                                                        |      | 871  | 57.2 | 6.3                                                         | D-3-phosphoglycerate dehydrogenase *                       |                            | 1.69 (0.022)  | O43175        | 188          | 6      | 14  |    |    |
| <b>Protein metabolism</b>                                                 |      |      |      |                                                             |                                                            |                            |               |               |              |        |     |    |    |
| 48                                                                        | 648  | 57.5 | 4.8  | protein disulfide-isomerase [Precursor]                     | 2.02 (0.0087)                                              |                            | P07237        | 318           | 12           | 21     |     |    |    |
| 49                                                                        | 528  | 69   | 5.9  | nuclear protein localization 4 homolog *                    | -2.73 (0.021)                                              |                            | AAH25930      | 163           | 7            | 10     |     |    |    |
| 50                                                                        | 715  | 57   | 6    | protein disulfide-isomerase ER60 *                          | 1.69 (0.031)                                               |                            | AAC51518      | 196           | 7            | 15     |     |    |    |
| 51                                                                        | 1235 | 32.7 | 4.7  | nucleophosmin                                               |                                                            | -2.07 (0.028)              | Q6V962        | 251           | 5            | 19     |     |    |    |
| 52                                                                        | 1277 | 1215 | 32.7 | 4.7                                                         | nucleophosmin                                              |                            | -1.7 (0.017)  | -1.67 (0.024) | Q6V962       | 53     | 1   | 3  |    |
| <b>Metabolism - Energy pathways</b>                                       |      |      |      |                                                             |                                                            |                            |               |               |              |        |     |    |    |
| 53                                                                        | 502  | 81   | 7.2  | glycerol-3-phosphate dehydrogenase, mitochondrial precursor | -1.56 (0.038)                                              |                            | P43304        | 308           | 13           | 17     |     |    |    |
| 54                                                                        |      | 876  | 57.8 | 5.2                                                         | 3-hydroxy-3-methylglutaryl-Coenzyme A synthase 1           |                            | -1.87 (0.022) | AAH83514      | 264          | 8      | 15  |    |    |
| 55                                                                        | 1327 | 1457 | 1398 | 26.8                                                        | 6.5                                                        | triosephosphate isomerase* | 2.06 (0.03)   | 1.84 (0.013)  | 1.54 (0.043) | P60174 | 495 | 8  | 36 |
| 56                                                                        | 1327 | 1457 | 1398 | 28.3                                                        | 6.3                                                        | ETHE1 protein *            | 2.06 (0.03)   | 1.84 (0.013)  | 1.54 (0.043) | O95571 | 53  | 2  | 12 |
| 57                                                                        | 1056 | 993  | 53   | 5.9                                                         | ubiquinol-cytochrome c reductase core protein I            |                            | -1.63 (0.017) | -1.6 (0.022)  | AAH09586     | 296    | 8   | 15 |    |
| <b>Transcription regulatory protein, RNA binding protein, translation</b> |      |      |      |                                                             |                                                            |                            |               |               |              |        |     |    |    |
| 58                                                                        | 266  | 96   | 6.4  | elongation factor 2                                         | -1.66 (0.041)                                              |                            | P13639        | 581           | 16           | 22     |     |    |    |
| 59                                                                        | 116  | 146  | 5.5  | leucine-rich PPR motif-containing protein                   | -1.78 (0.042)                                              |                            | AAA67549      | 136           | 5            | 4      |     |    |    |
| 60                                                                        | 859  | 56.8 | 6.5  | C-terminal binding protein 2                                | 2.07 (0.047)                                               |                            | Q5SQP7        | 193           | 5            | 4      |     |    |    |
| 61                                                                        | 303  | 89.7 | 5.9  | N-ras upstream protein NRU                                  | -2.5 (0.013)                                               |                            | S29815        | 270           | 14           | 19     |     |    |    |
| 62                                                                        | 300  | 89.7 | 5.9  | N-ras upstream protein NRU                                  | -2.12 (0.021)                                              |                            | S29815        | 140           | 7            | 10     |     |    |    |
| 63                                                                        | 304  | 89.7 | 5.9  | N-ras upstream protein NRU                                  | -2.03 (0.037)                                              |                            | S29815        | 375           | 12           | 13     |     |    |    |
| 64                                                                        |      | 746  | 47.8 | 5.5                                                         | heterogeneous nuclear ribonucleoprotein K                  |                            | -1.55 (0.043) | CAI16019      | 459          | 10     | 22  |    |    |
| <b>Miscellaneous</b>                                                      |      |      |      |                                                             |                                                            |                            |               |               |              |        |     |    |    |
| 65                                                                        | 283  | 87.5 | 5.2  | striatin 3 (Cell cycle autoantigen SG2NA)                   | 1.53 (0.038)                                               |                            | Q13033        | 89            | 2            | 3      |     |    |    |
| 66                                                                        | 1240 | 26.8 | 4.7  | hepatoma-derived growth factor                              |                                                            | -1.8 (0.023)               | A55055        | 217           | 4            | 16     |     |    |    |
| 67                                                                        | 805  | 769  | 56.8 | 5                                                           | EGF-containing fibulin-like extracellular matrix protein 1 |                            | -1.51 (0.024) | -1.6 (0.024)  | AAH14410     | 254    | 6   | 15 |    |
| 68                                                                        | 541  | 70.8 | 5.2  | L plastin*                                                  | -1.75 (0.021)                                              |                            | A35836        | 96            | 4            | 7      |     |    |    |
| 69                                                                        | 967  | 43   | 5.4  | GA17 *                                                      | 1.93 (0.021)                                               |                            | CAG29296      | 133           | 4            | 14     |     |    |    |
