# Supplementary material for: Proteomic Profiling of Human Keratinocytes Undergoing UVB-Induced Alternative Differentiation Reveals TRIpartite Motif Protein 29 as a Survival Factor
Source: PubMed Central journal article supplement (PMC2862717; doi:10.1371/journal.pone.0010462), 2010-05-03
Supplement: pone.0010462.s004.pdf [file pone.0010462.s004.pdf]

Table S2A. LC-MS-MS identification data including peptidic sequence of peptides for all proteins identified.

| N° in Table S1 |      | N° spot                                                                             |                                                               | protein identification |                 |                      |      |       |          |      |                                     |
|----------------|------|-------------------------------------------------------------------------------------|---------------------------------------------------------------|------------------------|-----------------|----------------------|------|-------|----------|------|-------------------------------------|
| 1              | 360  | MCM7                                                                                | minichromosome maintenance complex component 7                |                        |                 |                      |      |       |          |      |                                     |
| 1.             |      | AAH13375                                                                            | Mass: 81884                                                   | Score: 381             | Coverage: 14%   | number of peptides : |      | 9     |          |      |                                     |
|                |      | BC013375                                                                            | NID: - Homo sapiens replication licensing factor MCM7 - human |                        |                 |                      |      |       |          |      |                                     |
|                |      | Check to include this hit in error tolerant search or archive report                |                                                               |                        |                 |                      |      |       |          |      |                                     |
|                |      | Query                                                                               | Observed                                                      | Mr(expt)               | Mr(calc)        | Delta                | Miss | Score | Expect   | Rank | Peptide                             |
|                |      | 5                                                                                   | 425.2719                                                      | 848.5292               | 848.4504        | 0.0788               | 0    | 55    | 0.00084  | 1    | K.YGNQLVRL                          |
|                |      | 13                                                                                  | 515.3527                                                      | 1028.6908              | 1028.5978       | 0.0930               | 0    | 40    | 0.024    | 1    | K.AGILTTLNAR.C                      |
|                |      | 22                                                                                  | 594.3969                                                      | 1186.7792              | 1186.6670       | 0.1123               | 0    | 72    | 1.6e-005 | 1    | R.GSSSGVGLTAAVLR.D                  |
|                |      | 25                                                                                  | 636.3489                                                      | 1270.6832              | 1270.5717       | 0.1115               | 0    | 62    | 0.00012  | 1    | R.QJAEEDFYEK.L                      |
|                |      | 28                                                                                  | 682.4042                                                      | 1362.7938              | 1362.6714       | 0.1225               | 0    | 53    | 0.001    | 1    | R.CSILAAANPAYGR.Y                   |
|                |      | 30                                                                                  | 683.3572                                                      | 1364.6998              | 1364.5691       | 0.1307               | 0    | 81    | 1.8e-006 | 1    | K.SEDEESGAGELTR.E                   |
|                |      | 32                                                                                  | 716.9060                                                      | 1431.7974              | 1431.6704       | 0.1271               | 0    | 71    | 1.4e-005 | 1    | R.QPPSQFEPLDMK.L + Oxidation (M)    |
|                |      | 34                                                                                  | 725.4070                                                      | 1448.7994              | 1448.6718       | 0.1277               | 0    | 46    | 0.0054   | 1    | R.SPQNQYPAELMR.R + Oxidation (M)    |
|                |      | 39                                                                                  | 574.9928                                                      | 1721.9566              | 1721.8155       | 0.1411               | 0    | 24    | 0.74     | 1    | K.MQEHSDOQVPGNIPR.S + Oxidation (M) |
| N° in Table S1 |      | N° spot                                                                             |                                                               | protein identification |                 |                      |      |       |          |      |                                     |
| 2              | 1362 | stratifin                                                                           | 14-3-3 protein sigma                                          |                        |                 |                      |      |       |          |      |                                     |
| 1.             |      | Q96DH0_HUMAN                                                                        | Mass: 24378                                                   | Score: 361             | Coverage: 39%   | number of peptides : |      | 9     |          |      |                                     |
|                |      | SFN protein.- Homo sapiens (Human).                                                 |                                                               |                        |                 |                      |      |       |          |      |                                     |
|                |      | Check to include this hit in error tolerant search or archive report                |                                                               |                        |                 |                      |      |       |          |      |                                     |
|                |      | Query                                                                               | Observed                                                      | Mr(expt)               | Mr(calc)        | Delta                | Miss | Score | Expect   | Rank | Peptide                             |
|                |      | 8                                                                                   | 452.2554                                                      | 902.4962               | 902.5073        | -0.0110              | 0    | 40    | 0.026    | 1    | R.VLSSIEQK.S                        |
|                |      | 9                                                                                   | 454.2602                                                      | 906.5058               | 906.5174        | -0.0116              | 0    | 49    | 0.0037   | 1    | R.NLLSVAYK.N                        |
|                |      | 11                                                                                  | 466.7119                                                      | 931.4092               | 931.4221        | -0.0129              | 1    | 36    | 0.061    | 1    | K.MKGDYYR.Y                         |
|                |      | 14                                                                                  | 535.7637                                                      | 1069.5128              | 1069.5226       | -0.0098              | 0    | 40    | 0.024    | 1    | K.EMPPTNPIRL.L + Oxidation (M)      |
|                |      | 15                                                                                  | 554.7237                                                      | 1107.4328              | 1107.4502       | -0.0174              | 0    | 46    | 0.011    | 1    | K.GEELSCEER.N                       |
|                |      | 16                                                                                  | 561.2314                                                      | 1120.4482              | 1120.4569       | -0.0086              | 0    | 43    | 0.012    | 1    | R.YEDMAAFMK.G + Oxidation (M)       |
|                |      | 21                                                                                  | 591.2830                                                      | 1180.5514              | 1180.5611       | -0.0097              | 0    | 75    | 6.2e-006 | 1    | R.YLAEVATGDDK.K                     |
|                |      | 25                                                                                  | 629.7799                                                      | 1257.5452              | 1257.5547       | -0.0094              | 0    | 52    | 0.0014   | 1    | R.SAYQEAMDISK.K + Oxidation (M)     |
|                |      | 31                                                                                  | 516.2264                                                      | 1545.6574              | 1545.6906       | -0.0332              | 1    | 98    | 2.9e-008 | 1    | K.SNEEGSSEKGPVRE.E                  |
| N° in Table S1 |      | N° spot                                                                             |                                                               | protein identification |                 |                      |      |       |          |      |                                     |
| 3              | 1320 | PCNA                                                                                | proliferating cell nuclear antigen - human                    |                        |                 |                      |      |       |          |      |                                     |
|                |      | WMHUET                                                                              | Mass: 29092                                                   | Score: 273             | Coverage: 34%   | number of peptides : |      | 9     |          |      |                                     |
|                |      | Check to include this hit in error tolerant search or archive report                |                                                               |                        |                 |                      |      |       |          |      |                                     |
|                |      | Query                                                                               | Observed                                                      | Mr(expt)               | Mr(calc)        | Delta                | Miss | Score | Expect   | Rank | Peptide                             |
|                |      | 1                                                                                   | 450.7358                                                      | 899.4570               | 899.4535        | 0.0036               | 0    | 32    | 0.16     | 1    | K.IADMGHILK.Y + Oxidation (M)       |
|                |      | 2                                                                                   | 455.7072                                                      | 909.3998               | 909.4014        | -0.0016              | 0    | 50    | 0.0025   | 1    | K.MPSGEFAR.I + Oxidation (M)        |
|                |      | 4                                                                                   | 466.7490                                                      | 931.4834               | 931.4803        | 0.0031               | 0    | 31    | 0.23     | 1    | R.YLNFFTK.A                         |
|                |      | 6                                                                                   | 487.7135                                                      | 973.4124               | 973.4141        | -0.0016              | 0    | 47    | 0.0054   | 1    | R.SEGFDTYR.C                        |
|                |      | 7                                                                                   | 493.3233                                                      | 984.6320               | 984.6331        | -0.0011              | 1    | 42    | 0.013    | 1    | R.LVQGSILKK.V                       |
|                |      | 9                                                                                   | 631.3134                                                      | 1260.6122              | 1260.6132       | -0.0010              | 0    | 75    | 7e-006   | 1    | K.CAGNEDITLRA                       |
|                |      | 12                                                                                  | 647.3226                                                      | 1292.6306              | 1292.6360       | -0.0054              | 0    | 84    | 7.7e-007 | 1    | K.FSASGELGNGNIK.L                   |
|                |      | 17                                                                                  | 699.3422                                                      | 1396.6698              | 1396.6690       | 0.0009               | 0    | 72    | 1.4e-005 | 1    | R.NLAMGVNLTSMK.I + 2 Oxidation (M)  |
|                |      | 19                                                                                  | 757.3578                                                      | 1512.7010              | 1512.6983       | 0.0027               | 1    | 27    | 0.38     | 1    | K.YYLAPKIEDEGS.-                    |
| N° in Table S1 |      | N° spot                                                                             |                                                               | protein identification |                 |                      |      |       |          |      |                                     |
| 4 and 49       | 528  | Nuclear protein localization 4 homolog and/or dihydropyrimidinase-related protein 2 |                                                               |                        |                 |                      |      |       |          |      |                                     |
| 49             |      | AAH25930                                                                            | Mass: 69046                                                   | Score: 163             | coverage: : 10% | number of peptides : |      | 7     |          |      |                                     |
|                |      | Nuclear protein localization 4 homolog                                              |                                                               |                        |                 |                      |      |       |          |      |                                     |
|                |      | BC025930 NID: - Homo sapiens                                                        |                                                               |                        |                 |                      |      |       |          |      |                                     |
|                |      | Check to include this hit in error tolerant search or archive report                |                                                               |                        |                 |                      |      |       |          |      |                                     |
|                |      | Query                                                                               | Observed                                                      | Mr(expt)               | Mr(calc)        | Delta                | Miss | Score | Expect   | Rank | Peptide                             |
|                |      | 12                                                                                  | 493.2974                                                      | 984.5802               | 984.5352        | 0.0450               | 1    | 45    | 0.007    | 1    | R.VQSPDGVKRI                        |
|                |      | 14                                                                                  | 504.8145                                                      | 1007.6144              | 1007.5651       | 0.0493               | 1    | 45    | 0.0069   | 1    | R.ETAATFLKK.V                       |
|                |      | 16                                                                                  | 516.2776                                                      | 1030.5406              | 1030.4978       | 0.0428               | 1    | 32    | 0.14     | 1    | R.SRDPQLCR.H                        |
|                |      | 20                                                                                  | 522.7844                                                      | 1043.5542              | 1043.5036       | 0.0507               | 0    | 41    | 0.021    | 1    | R.LSPDGHFGSK.F                      |
|                |      | 21                                                                                  | 522.8054                                                      | 1043.5962              | 1043.5498       | 0.0464               | 0    | 58    | 0.00038  | 1    | K.AEVVDEIAAK.L                      |
|                |      | 33                                                                                  | 580.3257                                                      | 1158.6368              | 1158.5815       | 0.0553               | 0    | 44    | 0.0086   | 1    | K.CQPSAITLNR.Q                      |
|                |      | 36                                                                                  | 590.8409                                                      | 1179.6672              | 1179.5957       | 0.0715               | 0    | 54    | 0.00088  | 1    | K.FVALENISCK.I                      |
| 4              |      | JC5317                                                                              | Mass: 62711                                                   | Score: 67              | coverage: 4%    | number of peptides : |      | 3     |          |      |                                     |
|                |      | dihydropyrimidinase-related protein 2 - human                                       |                                                               |                        |                 |                      |      |       |          |      |                                     |
|                |      | Check to include this hit in error tolerant search or archive report                |                                                               |                        |                 |                      |      |       |          |      |                                     |
|                |      | Query                                                                               | Observed                                                      | Mr(expt)               | Mr(calc)        | Delta                | Miss | Score | Expect   | Rank | Peptide                             |
|                |      | 10                                                                                  | 454.7752                                                      | 907.5358               | 907.4915        | 0.0443               | 0    | 24    | 0.92     | 1    | K.VFNLYPR.K                         |
|                |      | 17                                                                                  | 516.3001                                                      | 1030.5856              | 1030.5407       | 0.0450               | 0    | 38    | 0.037    | 1    | K.SSAEIVIAQAR.K                     |
|                |      | 25                                                                                  | 542.8483                                                      | 1083.6820              | 1083.6288       | 0.0533               | 0    | 58    | 0.00033  | 1    | R.GSPLVVISQGI                       |

Table S2A

| N° in Table S1 N° spot protein identification                                                                         |     |                                                                                       |                      |                      |           |         |      |       |          |      |                                     |
|-----------------------------------------------------------------------------------------------------------------------|-----|---------------------------------------------------------------------------------------|----------------------|----------------------|-----------|---------|------|-------|----------|------|-------------------------------------|
| 5                                                                                                                     | 518 | dihydropyrimidinase-related protein 2<br>JC5317 Mass: 62711 Score: 70 Coverage: 3%    | number of peptides : |                      |           |         |      |       |          |      | 2                                   |
| dihydropyrimidinase-related protein 2 - human<br>Check to include this hit in error tolerant search or archive report |     |                                                                                       |                      |                      |           |         |      |       |          |      |                                     |
|                                                                                                                       |     | Query                                                                                 | Observed             | Mr(expt)             | Mr(calc)  | Delta   | Miss | Score | Expect   | Rank | Peptide                             |
|                                                                                                                       |     | <u>7</u>                                                                              | 516.2861             | 1030.5576            | 1030.5407 | 0.0170  | 0    | 40    | 0,025    | 1    | K.SSAEIVIAQAR.K                     |
|                                                                                                                       |     | 11                                                                                    | 542.8360             | 1083.6574            | 1083.6288 | 0.0287  | 0    | 60    | 0,00024  | 1    | R.GSPLVVISQGI                       |
| N° in Table S1 N° spot protein identification                                                                         |     |                                                                                       |                      |                      |           |         |      |       |          |      |                                     |
| 6                                                                                                                     | 575 | dihydropyrimidinase-related protein 2<br>JC5317 Mass: 62711 Score: 167 Coverage: 7%   | number of peptides : |                      |           |         |      |       |          |      | 4                                   |
| dihydropyrimidinase-related protein 2 - human<br>Check to include this hit in error tolerant search or archive report |     |                                                                                       |                      |                      |           |         |      |       |          |      |                                     |
|                                                                                                                       |     | Query                                                                                 | Observed             | Mr(expt)             | Mr(calc)  | Delta   | Miss | Score | Expect   | Rank | Peptide                             |
|                                                                                                                       |     | <u>6</u>                                                                              | 454.7765             | 907.5384             | 907.4915  | 0.0469  | 0    | 29    | 0,26     | 1    | K.VFNLYPR.K                         |
|                                                                                                                       |     | <u>8</u>                                                                              | 516.2947             | 1030.5748            | 1030.5407 | 0.0342  | 0    | 47    | 0,0051   | 1    | K.SSAEIVIAQAR.K                     |
|                                                                                                                       |     | <u>12</u>                                                                             | 542.8485             | 1083.6824            | 1083.6288 | 0.0537  | 0    | 56    | 0,00053  | 1    | R.GSPLVVISQGI                       |
|                                                                                                                       |     | 22                                                                                    | 871.4625             | 1740.9104            | 1740.7988 | 0.1116  | 0    | 74    | 6.1e-006 | 1    | K.MDENQFVAVTSTNAK.V + Oxidation (M) |
| N° in Table S1 N° spot protein identification                                                                         |     |                                                                                       |                      |                      |           |         |      |       |          |      |                                     |
| 7                                                                                                                     | 740 | dihydropyrimidinase-related protein 2<br>2. JC5317 Mass: 62711 Score: 41 Coverage: 1% | number of peptides : |                      |           |         |      |       |          |      | 1                                   |
| dihydropyrimidinase-related protein 2 - human<br>Check to include this hit in error tolerant search or archive report |     |                                                                                       |                      |                      |           |         |      |       |          |      |                                     |
|                                                                                                                       |     | Query                                                                                 | Observed             | Mr(expt)             | Mr(calc)  | Delta   | Miss | Score | Expect   | Rank | Peptide                             |
|                                                                                                                       |     | <u>3</u>                                                                              | 516.3078             | 1030.6010            | 1030.5407 | 0.0604  | 0    | 41    | 0,019    | 1    | K.SSAEIVIAQAR.K                     |
| N° in Table S1 N° spot protein identification                                                                         |     |                                                                                       |                      |                      |           |         |      |       |          |      |                                     |
| 8 and 68                                                                                                              | 541 | lamin B1 and/or L-plastin<br>1. VEHULB Mass: 66653 Score: 961 Coverage: 37%           | number of peptides : |                      |           |         |      |       |          |      | 26                                  |
| lamin B1 - human<br>Check to include this hit in error tolerant search or archive report                              |     |                                                                                       |                      |                      |           |         |      |       |          |      |                                     |
|                                                                                                                       |     | Query                                                                                 | Observed             | Mr(expt)             | Mr(calc)  | Delta   | Miss | Score | Expect   | Rank | Peptide                             |
|                                                                                                                       |     | <u>4</u>                                                                              | 415.7192             | 829.4238             | 829.4294  | -0.0055 | 0    | 34    | 0,15     | 1    | K.LSPSPSSR.V                        |
|                                                                                                                       |     | 9                                                                                     | 437.7292             | 873.4438             | 873.4556  | -0.0117 | 0    | 43    | 0,014    | 1    | R.LLVEVDSGR.Q                       |
|                                                                                                                       |     | <u>14</u>                                                                             | 486.7313             | 971.4480             | 971.4600  | -0.0119 | 0    | 25    | 0,97     | 1    | R.QJIEYK.L                          |
|                                                                                                                       |     | 17                                                                                    | 487.7354             | 973.4562             | 973.4716  | -0.0153 | 0    | 54    | 0,0012   | 1    | K.LLEGEER.L                         |
|                                                                                                                       |     | <u>18</u>                                                                             | 500.3123             | 998.6100             | 998.6124  | -0.0023 | 1    | 57    | 0,00044  | 1    | R.AKLQELGK.C                        |
|                                                                                                                       |     | 19                                                                                    | 512.7423             | 1023.4700            | 1023.4872 | -0.0172 | 0    | 24    | 0,87     | 1    | R.EYEAALNSK.D                       |
|                                                                                                                       |     | <u>20</u>                                                                             | 515.7890             | 1029.5634            | 1029.5706 | -0.0072 | 0    | 50    | 0,0025   | 1    | K.QLADETLK.V                        |
|                                                                                                                       |     | <u>22</u>                                                                             | 522.7815             | 1043.5484            | 1043.5611 | -0.0126 | 1    | 48    | 0,0044   | 1    | R.LQKEELR.E                         |
|                                                                                                                       |     | 24                                                                                    | 523.7651             | 1045.5156            | 1045.5152 | 0.0004  | 1    | 45    | 0,0091   | 1    | R.ALDDTARER.A                       |
|                                                                                                                       |     | <u>25</u>                                                                             | 534.7801             | 1067.5456            | 1067.5546 | -0.0089 | 0    | 55    | 0,00081  | 1    | K.LAQLHEMR.E                        |
|                                                                                                                       |     | <u>26</u>                                                                             | 536.3041             | 1070.5936            | 1070.6084 | -0.0147 | 1    | 42    | 0,016    | 1    | R.LKLSPPSSR.V                       |
|                                                                                                                       |     | <u>27</u>                                                                             | 537.7655             | 1073.5164            | 1073.5353 | -0.0188 | 0    | 45    | 0,0079   | 1    | K.ESDLNGAQK.L                       |
|                                                                                                                       |     | 29                                                                                    | 538.8239             | 1075.6332            | 1075.6389 | -0.0057 | 1    | 51    | 0,002    | 1    | R.LAVYIDKVR.S                       |
|                                                                                                                       |     | <u>31</u>                                                                             | 549.2880             | 1096.5614            | 1096.5764 | -0.0150 | 1    | 68    | 3e-005   | 1    | R.KIGTSSVSYK.Y                      |
|                                                                                                                       |     | <u>35</u>                                                                             | 577.8056             | 1153.5966            | 1153.6091 | -0.0125 | 0    | 68    | 4.1e-005 | 1    | R.AGGPTTPLSPTR.L                    |
|                                                                                                                       |     | 36                                                                                    | 579.8349             | 1157.6552            | 1157.6656 | -0.0103 | 1    | 65    | 8.4e-005 | 1    | K.KQLADETLK.V                       |
|                                                                                                                       |     | <u>37</u>                                                                             | 586.3300             | 1170.6454            | 1170.6496 | -0.0041 | 0    | 70    | 4.9e-005 | 1    | R.IQELEDLLAK.E                      |
|                                                                                                                       |     | <u>41</u>                                                                             | 587.3264             | 1172.6382            | 1172.6401 | -0.0018 | 1    | 91    | 2.3e-007 | 1    | K.DAALATALGDKK.S                    |
|                                                                                                                       |     | <u>44</u>                                                                             | 608.3276             | 1214.6406            | 1214.6506 | -0.0100 | 1    | 55    | 0,00067  | 1    | K.LLEGEERL.K.L                      |
|                                                                                                                       |     | 48                                                                                    | 626.3125             | 1250.6104            | 1250.6142 | -0.0038 | 0    | 54    | 0,00076  | 1    | K.ALYETELADAR.R                     |
|                                                                                                                       |     | <u>51</u>                                                                             | 647.3407             | 1292.6668            | 1292.6724 | -0.0056 | 1    | 67    | 4.2e-005 | 1    | K.LREYEAALNSK.D                     |
|                                                                                                                       |     | <u>52</u>                                                                             | 667.7970             | 1333.5794            | 1333.5898 | -0.0104 | 0    | 51    | 0,0021   | 1    | K.NQNSWGTGEDVK.V                    |
|                                                                                                                       |     | 54                                                                                    | 700.8018             | 1399.5890            | 1399.5925 | -0.0035 | 0    | 39    | 0,028    | 1    | K.SMYEEINETR.R                      |
|                                                                                                                       |     | <u>57</u>                                                                             | 756.8514             | 1511.6882            | 1511.6886 | -0.0003 | 0    | 114   | 7.8e-010 | 1    | R.LSSEMNTSTVNSARE + Oxidation (M)   |
|                                                                                                                       |     | <u>61</u>                                                                             | 551.2751             | 1650.8035            | 1650.8253 | -0.0218 | 1    | 62    | 0,00011  | 1    | R.LYKEELEQTYHAK.L                   |
|                                                                                                                       |     | 63                                                                                    | 512.7450             | 2046.9509            | 2047.0017 | -0.0508 | 1    | 60    | 0,00014  | 1    | K.LAQLHEMRHQDAQVRL + Oxidation (M)  |
|                                                                                                                       |     | A35836 Mass: 70815 Score: 96 Coverage: 7%                                             |                      | number of peptides : |           |         |      |       |          |      | 4                                   |
| L-plastin - human<br>Check to include this hit in error tolerant search or archive report                             |     |                                                                                       |                      |                      |           |         |      |       |          |      |                                     |
|                                                                                                                       |     | Query                                                                                 | Observed             | Mr(expt)             | Mr(calc)  | Delta   | Miss | Score | Expect   | Rank | Peptide                             |
|                                                                                                                       |     | 33                                                                                    | 559.2908             | 1116.5670            | 1116.5750 | -0.0079 | 0    | 29    | 0,31     | 1    | K.AACLPLPGYR.V                      |
|                                                                                                                       |     | <u>34</u>                                                                             | 568.3066             | 1134.5986            | 1134.6033 | -0.0046 | 0    | 61    | 0,00021  | 1    | R.QFVTATDVVR.G                      |
|                                                                                                                       |     | <u>47</u>                                                                             | 626.2692             | 1250.5238            | 1250.5383 | -0.0145 | 0    | 52    | 0,0015   | 1    | R.AECMLQQAER.L + Oxidation (M)      |
|                                                                                                                       |     | 60                                                                                    | 539.9177             | 1616.7313            | 1616.7641 | -0.0329 | 1    | 30    | 0,17     | 1    | K.TENLNDDKLNNAK.Y                   |

Table S2A

| N° in Table S1 N° spot protein identification |     |                                                                      |          |             |            |               |                      |       |          |                                     |
|-----------------------------------------------|-----|----------------------------------------------------------------------|----------|-------------|------------|---------------|----------------------|-------|----------|-------------------------------------|
| 9                                             | 693 | lamim B1                                                             | VEHULB   | Mass: 66653 | Score: 480 | Coverage: 27% | number of peptides : | 15    |          |                                     |
|                                               |     | lamim B1 - human                                                     |          |             |            |               |                      |       |          |                                     |
|                                               | 1.  | Check to include this hit in error tolerant search or archive report |          |             |            |               |                      |       |          |                                     |
|                                               |     | Query                                                                | Observed | Mr(expt)    | Mr(calc)   | Delta         | Miss                 | Score | Expect   | Rank Peptide                        |
|                                               |     | 4                                                                    | 415.7394 | 829.4642    | 829.4294   | 0.0349        | 0                    | 49    | 0,0048   | 1 K.LSPSPSSR.V                      |
|                                               |     | 8                                                                    | 437.7553 | 873.4960    | 873.4556   | 0.0405        | 0                    | 42    | 0,021    | 1 R.LVEVDSGR.Q                      |
|                                               |     | 11                                                                   | 485.2721 | 968.5296    | 968.4814   | 0.0482        | 0                    | 64    | 7.9e-005 | 1 K.IGDTSVSYK.Y                     |
|                                               |     | 14                                                                   | 487.7675 | 973.5204    | 973.4716   | 0.0489        | 0                    | 40    | 0,03     | 1 K.LLEGEER.L                       |
|                                               |     | 15                                                                   | 512.7748 | 1023.5350   | 1023.4872  | 0.0478        | 0                    | 31    | 0,16     | 1 R.EYEAALNSK.D                     |
|                                               |     | 16                                                                   | 515.8153 | 1029.6160   | 1029.5706  | 0.0454        | 0                    | 55    | 0,00087  | 1 K.QLADETLK.V                      |
|                                               |     | 17                                                                   | 537.7984 | 1073.5822   | 1073.5353  | 0.0470        | 0                    | 53    | 0,0013   | 1 K.ESDLNGAQK.L                     |
|                                               |     | 19                                                                   | 559.2894 | 1116.5642   | 1116.5159  | 0.0483        | 0                    | 38    | 0,04     | 1 K.NSQGEEVAQR.S                    |
|                                               |     | 22                                                                   | 577.8395 | 1153.6644   | 1153.6091  | 0.0553        | 0                    | 79    | 2.6e-006 | 1 R.AGGPTTLPSPTR.L                  |
|                                               |     | 23                                                                   | 586.3619 | 1170.7092   | 1170.6496  | 0.0597        | 0                    | 30    | 0,22     | 1 R.IQEEDLLAK.E                     |
|                                               |     | 24                                                                   | 587.3559 | 1172.6972   | 1172.6401  | 0.0572        | 1                    | 104   | 8.8e-009 | 1 K.DAALATALGDKK.S                  |
|                                               |     | 25                                                                   | 626.3455 | 1250.6764   | 1250.6142  | 0.0622        | 0                    | 56    | 0,00059  | 1 K.ALYETELADAR.R                   |
|                                               |     | 26                                                                   | 667.8342 | 1333.6538   | 1333.5898  | 0.0640        | 0                    | 49    | 0,0035   | 1 K.NQNSWGTGEDVK.V                  |
|                                               |     | 27                                                                   | 708.8346 | 1415.6546   | 1415.5874  | 0.0672        | 0                    | 55    | 0,00058  | 1 K.SMYEEINETR.R + Oxidation (M)    |
|                                               |     | 28                                                                   | 756.8853 | 1511.7560   | 1511.6886  | 0.0675        | 0                    | 130   | 2.1e-011 | 1 R.LSSEMNTSTVNSARE + Oxidation (M) |

| N° in Table S1 N° spot protein identification |     |                                                                      |          |             |            |               |                      |       |          |                                     |
|-----------------------------------------------|-----|----------------------------------------------------------------------|----------|-------------|------------|---------------|----------------------|-------|----------|-------------------------------------|
| 10                                            | 689 | lamim B1                                                             | VEHULB   | Mass: 66653 | Score: 490 | Coverage: 25% | number of peptides : | 15    |          |                                     |
|                                               |     | lamim B1 - human                                                     |          |             |            |               |                      |       |          |                                     |
|                                               | 1.  | Check to include this hit in error tolerant search or archive report |          |             |            |               |                      |       |          |                                     |
|                                               |     | Query                                                                | Observed | Mr(expt)    | Mr(calc)   | Delta         | Miss                 | Score | Expect   | Rank Peptide                        |
|                                               |     | 1                                                                    | 400.7723 | 799.5300    | 799.4803   | 0.0497        | 0                    | 28    | 0,46     | 1 K.LQJELGK.C                       |
|                                               |     | 2                                                                    | 411.2684 | 820.5222    | 820.4694   | 0.0528        | 0                    | 35    | 0,078    | 1 R.LAVYIDK.V                       |
|                                               |     | 4                                                                    | 415.7461 | 829.4776    | 829.4294   | 0.0483        | 0                    | 45    | 0,011    | 1 K.LSPSPSSR.V                      |
|                                               |     | 8                                                                    | 437.7625 | 873.5104    | 873.4556   | 0.0549        | 0                    | 42    | 0,022    | 1 R.LVEVDSGR.Q                      |
|                                               |     | 12                                                                   | 485.2760 | 968.5374    | 968.4814   | 0.0560        | 0                    | 64    | 7.7e-005 | 1 K.IGDTSVSYK.Y                     |
|                                               |     | 16                                                                   | 487.7742 | 973.5338    | 973.4716   | 0.0623        | 0                    | 46    | 0,007    | 1 K.LLEGEER.L                       |
|                                               |     | 18                                                                   | 512.7827 | 1023.5508   | 1023.4872  | 0.0636        | 0                    | 46    | 0,0053   | 1 R.EYEAALNSK.D                     |
|                                               |     | 19                                                                   | 515.8230 | 1029.6314   | 1029.5706  | 0.0608        | 0                    | 62    | 0,0002   | 1 K.QLADETLK.V                      |
|                                               |     | 20                                                                   | 522.8178 | 1043.6210   | 1043.5611  | 0.0600        | 1                    | 46    | 0,0059   | 1 R.LQKEELR.E                       |
|                                               |     | 22                                                                   | 549.3292 | 1096.6438   | 1096.5764  | 0.0674        | 1                    | 45    | 0,0063   | 1 R.KIGDTSVSYK.Y                    |
|                                               |     | 24                                                                   | 577.8475 | 1153.6804   | 1153.6091  | 0.0713        | 0                    | 57    | 0,00049  | 1 R.AGGPTTLPSPTR.L                  |
|                                               |     | 26                                                                   | 587.3626 | 1172.7106   | 1172.6401  | 0.0706        | 1                    | 70    | 2.5e-005 | 1 K.DAALATALGDKK.S                  |
|                                               |     | 27                                                                   | 667.8409 | 1333.6672   | 1333.5898  | 0.0774        | 0                    | 51    | 0,0022   | 1 K.NQNSWGTGEDVK.V                  |
|                                               |     | 28                                                                   | 708.8447 | 1415.6748   | 1415.5874  | 0.0874        | 0                    | 55    | 0,00067  | 1 K.SMYEEINETR.R + Oxidation (M)    |
|                                               |     | 30                                                                   | 756.8973 | 1511.7800   | 1511.6886  | 0.0915        | 0                    | 130   | 2e-011   | 1 R.LSSEMNTSTVNSARE + Oxidation (M) |

| N° in Table S1 N° spot protein identification |      |                                                                      |          |             |            |               |                      |       |          |                                   |
|-----------------------------------------------|------|----------------------------------------------------------------------|----------|-------------|------------|---------------|----------------------|-------|----------|-----------------------------------|
| 11                                            | 1019 | CapG                                                                 | A43358   | Mass: 38779 | Score: 767 | Coverage: 20% | number of peptides : | 8     |          |                                   |
|                                               |      | macrophage capping protein - human                                   |          |             |            |               |                      |       |          |                                   |
|                                               | 2.   | Check to include this hit in error tolerant search or archive report |          |             |            |               |                      |       |          |                                   |
|                                               |      | Query                                                                | Observed | Mr(expt)    | Mr(calc)   | Delta         | Miss                 | Score | Expect   | Rank Peptide                      |
|                                               |      | 7                                                                    | 499.8599 | 997.7052    | 997.6032   | 0.1020        | 1                    | 42    | 0,013    | 1 K.ARDALAIR.D                    |
|                                               |      | 12                                                                   | 510.8261 | 1019.6376   | 1019.5399  | 0.0977        | 0                    | 64    | 9.6e-005 | 1 K.ANAQAAALYK.V                  |
|                                               |      | 16                                                                   | 522.8574 | 1043.7002   | 1043.5975  | 0.1028        | 1                    | 55    | 0,00082  | 1 K.TSTGAPAAIK.L                  |
|                                               |      | 27                                                                   | 629.9046 | 1257.7946   | 1257.6677  | 0.1270        | 1                    | 33    | 0,12     | 1 R.DLALAIRSER.Q                  |
|                                               |      | 30                                                                   | 640.8735 | 1279.7324   | 1279.6078  | 0.1247        | 0                    | 97    | 4e-008   | 1 K.VSDATGQMLTK.V + Oxidation (M) |
|                                               |      | 36                                                                   | 659.3541 | 1316.6936   | 1316.5732  | 0.1205        | 0                    | 82    | 1.2e-006 | 1 K.EGNPEEDLTADK.A                |
|                                               |      | 42                                                                   | 676.3806 | 1350.7466   | 1350.6204  | 0.1263        | 0                    | 85    | 5.9e-007 | 1 K.YQEGGVESAFHK.T                |
|                                               |      | 57                                                                   | 550.6633 | 1648.9681   | 1648.8208  | 0.1472        | 1                    | 57    | 0,00034  | 1 R.GLKYGEGGVESAFHK.T             |

| N° in Table S1 N° spot protein identification |     |                                                                                     |            |             |             |               |                      |       |          |                 |
|-----------------------------------------------|-----|-------------------------------------------------------------------------------------|------------|-------------|-------------|---------------|----------------------|-------|----------|-----------------|
| 12                                            | 783 | keratin 8 (K8)                                                                      | K2C8 HUMAN | Mass: 53510 | Score: 1182 | Coverage: 45% | number of peptides : | 26    |          |                 |
|                                               |     | Keratin, type II cytoskeletal 8 (Cytokeratin 8) (K8) (CK 8) - Homo sapiens (Human). |            |             |             |               |                      |       |          |                 |
|                                               | 1.  | Check to include this hit in error tolerant search or archive report                |            |             |             |               |                      |       |          |                 |
|                                               |     | Query                                                                               | Observed   | Mr(expt)    | Mr(calc)    | Delta         | Miss                 | Score | Expect   | Rank Peptide    |
|                                               |     | 2                                                                                   | 414.2479   | 826.4812    | 826.4225    | 0.0588        | 0                    | 38    | 0,038    | 1 K.FASFDK.V    |
|                                               |     | 3                                                                                   | 435.7549   | 869.4952    | 869.4243    | 0.0710        | 0                    | 70    | 1.8e-005 | 1 R.ISSSSFSR.L  |
|                                               |     | 5                                                                                   | 466.7748   | 931.5350    | 931.4610    | 0.0740        | 0                    | 50    | 0,0026   | 1 K.LLEGEER.L   |
|                                               |     | 6                                                                                   | 500.8219   | 999.6292    | 999.5600    | 0.0692        | 0                    | 53    | 0,0012   | 1 R.LQAEIEGLK.G |

Table S2A

|           |          |           |           |        |   |     |          |   |                                  |
|-----------|----------|-----------|-----------|--------|---|-----|----------|---|----------------------------------|
| <u>8</u>  | 515.8284 | 1029.6422 | 1029.5607 | 0.0815 | 0 | 32  | 0,17     | 1 | K.WSLLQQQK.T                     |
| <u>13</u> | 523.3251 | 1044.6356 | 1044.5451 | 0.0905 | 0 | 55  | 0,00078  | 1 | R.QLETLGQEK.L                    |
| 14        | 530.8319 | 1059.6492 | 1059.5560 | 0.0933 | 1 | 63  | 0,00013  | 1 | R.KLLEGEESRL                     |
| <u>15</u> | 533.8095 | 1065.6044 | 1065.5090 | 0.0954 | 1 | 47  | 0,005    | 1 | K.YEDEINKR.T                     |
| <u>16</u> | 540.3059 | 1078.5972 | 1078.5043 | 0.0929 | 0 | 49  | 0,0028   | 1 | K.AQYEDIANR.S                    |
| <u>17</u> | 540.3157 | 1078.6168 | 1078.5294 | 0.0874 | 0 | 36  | 0,057    | 1 | R.QLYEEIRE                       |
| 19        | 541.8482 | 1081.6818 | 1081.5920 | 0.0899 | 1 | 52  | 0,0013   | 1 | K.FASFDKVR.F                     |
| <u>21</u> | 550.7804 | 1099.5462 | 1099.4492 | 0.0971 | 0 | 26  | 0,56     | 1 | K.DVDEAYMKNK.V + Oxidation (M)   |
| <u>24</u> | 565.3637 | 1128.7128 | 1128.6138 | 0.0990 | 1 | 83  | 1.1e-006 | 1 | R.GELAIKIDANAK.L                 |
| 25        | 565.3646 | 1128.7146 | 1128.6138 | 0.1008 | 0 | 72  | 1.4e-005 | 1 | K.LSELEAALQR.A                   |
| <u>27</u> | 569.3269 | 1136.6392 | 1136.5713 | 0.0679 | 0 | 69  | 5.6e-005 | 1 | K.YEELQSLAGK.H                   |
| <u>29</u> | 577.3301 | 1152.6456 | 1152.5485 | 0.0972 | 0 | 46  | 0,0057   | 1 | R.EYQELMNVK.L                    |
| <u>33</u> | 587.3561 | 1172.6976 | 1172.6288 | 0.0688 | 0 | 68  | 4.2e-005 | 1 | K.LVSESSDVLPK.-                  |
| 36        | 593.3292 | 1184.6438 | 1184.5383 | 0.1055 | 0 | 62  | 0,00016  | 1 | R.AEAESMYQIK.Y + Oxidation (M)   |
| <u>37</u> | 601.3842 | 1200.7538 | 1200.6462 | 0.1076 | 1 | 48  | 0,0037   | 1 | R.RQLETLGQEK.L                   |
| <u>40</u> | 612.8548 | 1223.6950 | 1223.5816 | 0.1135 | 1 | 49  | 0,00044  | 1 | R.TKTEISEMNR.N + Oxidation (M)   |
| 45        | 668.8961 | 1335.7776 | 1335.6591 | 0.1185 | 0 | 87  | 4.1e-007 | 1 | R.SLDMDSIAEVK.A + Oxidation (M)  |
| <u>47</u> | 672.8967 | 1343.7788 | 1343.6681 | 0.1108 | 0 | 86  | 5.6e-007 | 1 | R.ASLEAAIADAEQR.G                |
| <u>50</u> | 684.8989 | 1367.7832 | 1367.6642 | 0.1190 | 0 | 73  | 1.6e-005 | 1 | R.TEMENEFVLIK.K + Oxidation (M)  |
| <u>52</u> | 714.9066 | 1427.7986 | 1427.6714 | 0.1272 | 1 | 64  | 6.8e-005 | 1 | R.SRAEAESMYQIK.Y + Oxidation (M) |
| 56        | 738.4141 | 1474.8136 | 1474.6908 | 0.1229 | 0 | 112 | 1.2e-009 | 1 | R.LESGMQNMSIHTK.T                |
| <u>57</u> | 499.6308 | 1495.8706 | 1495.7592 | 0.1114 | 1 | 72  | 1.4e-005 | 1 | h                                |

**N° in Table S1 N° spot protein identification**

| 13 and 50 | 715 | ER60, K8 and K6A                                                                              |                 |                 |                 |              |             |              |                        |                                   |
|-----------|-----|-----------------------------------------------------------------------------------------------|-----------------|-----------------|-----------------|--------------|-------------|--------------|------------------------|-----------------------------------|
| 50        |     | JC5704                                                                                        | Mass: 57160     | Score: 196      | Coverage: 15%   |              |             |              | number of peptides : 7 |                                   |
|           |     | protein disulfide-isomerase (EC 5.3.4.1) ER60 precursor - human                               |                 |                 |                 |              |             |              |                        |                                   |
|           |     | Check to include this hit in error tolerant search or archive report                          |                 |                 |                 |              |             |              |                        |                                   |
|           |     | <b>Query</b>                                                                                  | <b>Observed</b> | <b>Mr(expt)</b> | <b>Mr(calc)</b> | <b>Delta</b> | <b>Miss</b> | <b>Score</b> | <b>Expect</b>          | <b>Rank</b> <b>Peptide</b>        |
|           |     | <u>19</u>                                                                                     | 542.8403        | 1083.6660       | 1083.5600       | 0.1060       | 0           | 60           | 0,0002                 | 1 K.YGVSGYPTLK.I                  |
|           |     | 26                                                                                            | 590.3557        | 1178.6968       | 1178.5792       | 0.1177       | 1           | 27           | 0,47                   | 1 K.AASNLNRDNYR.F                 |
|           |     | 28                                                                                            | 594.8289        | 1187.6432       | 1187.5281       | 0.1152       | 0           | 52           | 0,0015                 | 1 K.FVMQEEFR.D + Oxidation (M)    |
|           |     | <u>30</u>                                                                                     | 596.3607        | 1190.7068       | 1190.5931       | 0.1137       | 0           | 55           | 0,00076                | 1 R.LAPEYEAATR.L                  |
|           |     | <u>32</u>                                                                                     | 599.4230        | 1196.8314       | 1196.7128       | 0.1186       | 1           | 37           | 0,036                  | 1 K.LSKDPNVIK.M                   |
|           |     | 37                                                                                            | 618.8224        | 1235.6302       | 1235.5054       | 0.1248       | 0           | 38           | 0,037                  | 1 R.DGEEAGAYDGR.T                 |
|           |     | <u>51</u>                                                                                     | 790.5003        | 1578.9860       | 1578.8253       | 0.1607       | 0           | 42           | 0,0095                 | 1 R.EATNPPVQEEKPK.K               |
| 13        |     | K2C8_HUMAN                                                                                    | Mass: 53510     | Score: 286      | Coverage: 11%   |              |             |              | number of peptides : 4 |                                   |
|           |     | Keratin, type II cytoskeletal 8 (Cytokeratin 8) (K8) (CK 8).- Homo sapiens (Human).           |                 |                 |                 |              |             |              |                        |                                   |
|           |     | Check to include this hit in error tolerant search or archive report                          |                 |                 |                 |              |             |              |                        |                                   |
|           |     | <b>Query</b>                                                                                  | <b>Observed</b> | <b>Mr(expt)</b> | <b>Mr(calc)</b> | <b>Delta</b> | <b>Miss</b> | <b>Score</b> | <b>Expect</b>          | <b>Rank</b> <b>Peptide</b>        |
|           |     | <u>24</u>                                                                                     | 565.3693        | 1128.7240       | 1128.6138       | 0.1102       | 0           | 49           | 0,0031                 | 2 K.LSELEAALQR.A                  |
|           |     | 39                                                                                            | 668.9056        | 1335.7966       | 1335.6591       | 0.1375       | 0           | 61           | 0,00017                | 1 R.SLDMDSIAEVK.A + Oxidation (M) |
|           |     | <u>41</u>                                                                                     | 672.9132        | 1343.8118       | 1343.6681       | 0.1438       | 0           | 79           | 2.5e-006               | 1 R.ASLEAAIADAEQR.G               |
|           |     | <u>55</u>                                                                                     | 899.5122        | 1797.0098       | 1796.8250       | 0.1848       | 1           | 107          | 3.7e-009               | 1 K.DVDEAYMKNKVEESRL              |
| 13        |     | KRHUEA                                                                                        | Mass: 60293     | Score: 97       | Coverage: 9%    |              |             |              | number of peptides : 5 |                                   |
|           |     | keratin 6a, type II - human                                                                   |                 |                 |                 |              |             |              |                        |                                   |
|           |     | Keratin, type I cytoskeletal 17 (Cytokeratin 17) (K17) (CK 17) (39.1).- Homo sapiens (Human). |                 |                 |                 |              |             |              |                        |                                   |
|           |     | Check to include this hit in error tolerant search or archive report                          |                 |                 |                 |              |             |              |                        |                                   |
|           |     | <b>Query</b>                                                                                  | <b>Observed</b> | <b>Mr(expt)</b> | <b>Mr(calc)</b> | <b>Delta</b> | <b>Miss</b> | <b>Score</b> | <b>Expect</b>          | <b>Rank</b> <b>Peptide</b>        |
|           |     | <u>9</u>                                                                                      | 473.3047        | 944.5948        | 944.5039        | 0.0909       | 1           | 35           | 0,1                    | 1 R.GRLDSELR.G                    |
|           |     | 11                                                                                            | 503.2877        | 1004.5608       | 1004.4597       | 0.1012       | 0           | 30           | 0,22                   | 1 K.LLEGEECRL                     |
|           |     | <u>13</u>                                                                                     | 506.8061        | 1011.5976       | 1011.4985       | 0.0992       | 0           | 46           | 0,0053                 | 1 R.SGFSSVSISR.S                  |
|           |     | <u>34</u>                                                                                     | 602.3854        | 1202.7562       | 1202.6295       | 0.1267       | 0           | 41           | 0,018                  | 1 K.WTLLQEQGTK.T                  |
|           |     | 42                                                                                            | 675.9300        | 1349.8454       | 1349.7190       | 0.1264       | 1           | 43           | 0,014                  | 1 R.TAAENEFVTLKK.D                |

**N° in Table S1 N° spot protein identification**

| 14 | 866 | K17                                                                                           |                 |                 |                 |              |             |              |                         |                            |
|----|-----|-----------------------------------------------------------------------------------------------|-----------------|-----------------|-----------------|--------------|-------------|--------------|-------------------------|----------------------------|
| 1. |     | K1CQ_HUMAN                                                                                    | Mass: 48230     | Score: 2702     | Coverage: 52%   |              |             |              | number of peptides : 28 |                            |
|    |     | Keratin, type I cytoskeletal 17 (Cytokeratin 17) (K17) (CK 17) (39.1).- Homo sapiens (Human). |                 |                 |                 |              |             |              |                         |                            |
|    |     | Check to include this hit in error tolerant search or archive report                          |                 |                 |                 |              |             |              |                         |                            |
|    |     | <b>Query</b>                                                                                  | <b>Observed</b> | <b>Mr(expt)</b> | <b>Mr(calc)</b> | <b>Delta</b> | <b>Miss</b> | <b>Score</b> | <b>Expect</b>           | <b>Rank</b> <b>Peptide</b> |
|    |     | 1                                                                                             | 404.1901        | 806.3656        | 806.3922        | -0.0266      | 0           | 57           | 0,00056                 | 1 R.LAADDFR.T              |
|    |     | <u>2</u>                                                                                      | 405.2026        | 808.3906        | 808.4330        | -0.0424      | 0           | 35           | 0,069                   | 1 R.LASYLDK.V              |
|    |     | 5                                                                                             | 487.7318        | 973.4490        | 973.5080        | -0.0589      | 0           | 36           | 0,064                   | 1 R.TIEELQNK.I             |

Table S2A

|            |          |           |           |         |   |     |          |   |                                |
|------------|----------|-----------|-----------|---------|---|-----|----------|---|--------------------------------|
| <u>7</u>   | 492.7357 | 983.4568  | 983.4924  | -0.0355 | 0 | 56  | 0,0006   | 1 | R.QFTSSSSIK.G                  |
| <u>9</u>   | 495.2571 | 988.4996  | 988.5301  | -0.0305 | 1 | 36  | 0,069    | 1 | K.SEISELRR.T                   |
| <u>10</u>  | 497.2414 | 992.4682  | 992.5542  | -0.0860 | 1 | 30  | 0,29     | 1 | K.EELAYLK.N                    |
| <u>11</u>  | 497.6992 | 993.3838  | 993.4192  | -0.0353 | 0 | 29  | 0,27     | 1 | R.DYSQYR.T                     |
| 15         | 515.2935 | 1028.5724 | 1028.5866 | -0.0141 | 0 | 53  | 0,0013   | 1 | R.VLDELTLAR.A                  |
| <u>24</u>  | 517.7283 | 1033.4420 | 1033.4974 | -0.0554 | 0 | 65  | 8e-005   | 1 | R.LSGGLGAGSRL.L                |
| <u>27</u>  | 518.7578 | 1035.5010 | 1035.5250 | -0.0239 | 1 | 35  | 0,08     | 1 | K.IRDWYQR.Q                    |
| <u>29</u>  | 539.7452 | 1077.4758 | 1077.4873 | -0.0114 | 0 | 50  | 0,0023   | 1 | K.ATMQNLNDR.L + Oxidation (M)  |
| 33         | 559.2590 | 1116.5034 | 1116.5662 | -0.0628 | 0 | 70  | 2.2e-005 | 1 | R.TIVEEVQDGK.V                 |
| <u>39</u>  | 561.7824 | 1121.5502 | 1121.5717 | -0.0214 | 0 | 61  | 0,0002   | 1 | R.LEQEIATYR.R                  |
| <u>41</u>  | 572.7481 | 1143.4816 | 1143.4873 | -0.0056 | 0 | 46  | 0,0067   | 1 | K.DAEDWFFSK.T                  |
| 45         | 593.3437 | 1184.6728 | 1184.6877 | -0.0148 | 1 | 41  | 0,018    | 1 | R.RVLDELTLAR.A                 |
| <u>46</u>  | 593.8182 | 1185.6218 | 1185.6353 | -0.0135 | 0 | 71  | 1.9e-005 | 1 | R.LSVEADINGLR.R                |
| <u>48</u>  | 611.7949 | 1221.5752 | 1221.6353 | -0.0601 | 1 | 70  | 2e-005   | 1 | R.TKFETEALR.L                  |
| <u>51</u>  | 621.7675 | 1241.5204 | 1241.5458 | -0.0254 | 0 | 65  | 7.7e-005 | 1 | K.NHEEEMNALR.G                 |
| 55         | 636.7943 | 1271.5740 | 1271.5822 | -0.0082 | 1 | 80  | 5.1e-006 | 1 | R.KDAEDWFFSK.T                 |
| <u>61</u>  | 660.3223 | 1318.6300 | 1318.6438 | -0.0138 | 0 | 86  | 4.90E-07 | 1 | R.ADLMEQIENLKE + Oxidation (M) |
| <u>66</u>  | 671.8676 | 1341.7206 | 1341.7364 | -0.0158 | 1 | 66  | 5.2e-005 | 1 | R.LSVEADINGLR.V                |
| 71         | 673.3010 | 1344.5874 | 1344.6772 | -0.0898 | 0 | 115 | 7.7e-010 | 1 | R.ALEEANTELEVK.I               |
| <u>77</u>  | 681.3477 | 1360.6808 | 1360.6834 | -0.0025 | 0 | 99  | 3.2e-008 | 1 | R.EVATNSSELVQSGK.S             |
| <u>80</u>  | 690.3457 | 1378.6768 | 1378.7204 | -0.0436 | 1 | 91  | 1.7e-007 | 1 | K.TRLEQEIATYR.R                |
| <u>87</u>  | 702.2980 | 1402.5814 | 1402.6688 | -0.0873 | 0 | 113 | 1.1e-009 | 1 | K.ASLEGNLAETENR.Y              |
| 95         | 751.7925 | 1501.5704 | 1501.5813 | -0.0109 | 0 | 86  | 5.2e-007 | 1 | R.CEMEQQNQEK.I + Oxidation (M) |
| <u>100</u> | 758.8665 | 1515.7184 | 1515.7569 | -0.0384 | 0 | 118 | 3e-010   | 1 | R.LLEGEDAHLTQYK.K              |
| <u>106</u> | 558.2799 | 1671.8179 | 1671.8580 | -0.0401 | 1 | 91  | 1.6e-007 | 1 | R.LLEGEDAHLTQYK.K              |

## N° in Table S1 N° spot protein identification

15 1063 K17 and K14

1. K1CO HUMAN Mass: 48230 Score: 1278 Coverage: 45% number of peptides : 23  
Keratin, type I cytoskeletal 17 (Cytokeratin 17) (K17) (CK 17) (39.1)- Homo sapiens (Human).

Check to include this hit in error tolerant search or archive report

| Query     | Observed | Mr(expt)  | Mr(calc)  | Delta  | Miss | Score | Expect   | Rank | Peptide                         |
|-----------|----------|-----------|-----------|--------|------|-------|----------|------|---------------------------------|
| <u>1</u>  | 404.2172 | 806.4198  | 806.3922  | 0.0276 | 0    | 43    | 0,014    | 1    | R.LAADDFR.T                     |
| <u>2</u>  | 405.2363 | 808.4580  | 808.4330  | 0.0250 | 0    | 33    | 0,12     | 1    | R.LASYLDK.V                     |
| <u>8</u>  | 487.7757 | 973.5368  | 973.5080  | 0.0289 | 0    | 37    | 0,055    | 1    | R.TIEELQNK.I                    |
| 9         | 492.7670 | 983.5194  | 983.4924  | 0.0271 | 0    | 58    | 0,00035  | 1    | R.QFTSSSSIK.G                   |
| <u>11</u> | 495.2862 | 988.5578  | 988.5301  | 0.0277 | 1    | 33    | 0,13     | 1    | K.SEISELRR.T                    |
| <u>12</u> | 497.2723 | 992.5300  | 992.4927  | 0.0374 | 0    | 52    | 0,0018   | 1    | K.FETEALR.L                     |
| <u>14</u> | 497.7352 | 993.4558  | 993.4192  | 0.0367 | 0    | 26    | 0,6      | 1    | R.DYSQYR.T                      |
| <u>15</u> | 515.3189 | 1028.6232 | 1028.5866 | 0.0367 | 0    | 43    | 0,014    | 1    | R.VLDELTLAR.A                   |
| <u>16</u> | 517.7715 | 1033.5284 | 1033.4974 | 0.0310 | 0    | 68    | 3.7e-005 | 1    | R.LSGGLGAGSRL.L                 |
| <u>17</u> | 518.7886 | 1035.5626 | 1035.5250 | 0.0377 | 1    | 27    | 0,5      | 1    | K.IRDWYQR.Q                     |
| 23        | 539.7677 | 1077.5208 | 1077.4873 | 0.0336 | 0    | 67    | 5.2e-005 | 1    | K.ATMQNLNDR.L + Oxidation (M)   |
| <u>26</u> | 559.3101 | 1116.6056 | 1116.5662 | 0.0394 | 0    | 66    | 6.2e-005 | 1    | R.TIVEEVQDGK.V                  |
| <u>28</u> | 561.8143 | 1121.6140 | 1121.5717 | 0.0424 | 0    | 52    | 0,0016   | 1    | R.LEQEIATYR.R                   |
| 29        | 572.7736 | 1143.5326 | 1143.4873 | 0.0454 | 0    | 36    | 0,06     | 1    | K.DAEDWFFSK.T                   |
| <u>36</u> | 611.8444 | 1221.6742 | 1221.6353 | 0.0389 | 1    | 72    | 1.2e-005 | 1    | R.TKFETEALR.L                   |
| <u>42</u> | 629.7987 | 1257.5828 | 1257.5408 | 0.0421 | 0    | 43    | 0,012    | 1    | K.NHEEEMNALR.G + Oxidation (M)  |
| <u>46</u> | 673.3731 | 1344.7316 | 1344.6772 | 0.0544 | 0    | 99    | 3e-008   | 1    | R.ALEEANTELEVK.I                |
| 48        | 681.3714 | 1360.7282 | 1360.6834 | 0.0449 | 0    | 95    | 7.7e-007 | 1    | R.EVATNSSELVQSGK.S              |
| <u>51</u> | 690.3946 | 1378.7746 | 1378.7204 | 0.0542 | 1    | 64    | 9.3e-005 | 1    | K.TRLEQEIATYR.R                 |
| <u>53</u> | 462.8973 | 1385.6701 | 1385.6357 | 0.0344 | 1    | 38    | 0,03     | 1    | K.KNHEEEMNALR.G + Oxidation (M) |
| 54        | 702.3699 | 1402.7252 | 1402.6688 | 0.0565 | 0    | 82    | 1.2e-006 | 1    | K.ASLEGNLAETENR.Y               |
| <u>59</u> | 751.8244 | 1501.6342 | 1501.5813 | 0.0529 | 0    | 89    | 2.7e-007 | 1    | R.CEMEQQNQEK.I + Oxidation (M)  |
| <u>61</u> | 548.9725 | 1643.8957 | 1643.8518 | 0.0438 | 1    | 59    | 0,0002   | 1    | R.LLEGEDAHLTQYK.E               |

KRHUE Mass: 51916 Score: 633 Coverage: 28%

15 keratin 14, type I, cytoskeletal - human

number of peptides :

15 with 4 specific for K14 in comparison with K17

2. Check to include this hit in error tolerant search or archive report

| Query     | Observed | Mr(expt)  | Mr(calc)  | Delta  | Miss | Score | Expect | Rank | Peptide       |
|-----------|----------|-----------|-----------|--------|------|-------|--------|------|---------------|
| <u>1</u>  | 404.2172 | 806.4198  | 806.3922  | 0.0276 | 0    | 43    | 0,014  | 1    | R.LAADDFR.T   |
| <u>2</u>  | 405.2363 | 808.4580  | 808.4330  | 0.0250 | 0    | 33    | 0,12   | 1    | R.LASYLDK.V   |
| <u>11</u> | 495.2862 | 988.5578  | 988.5301  | 0.0277 | 1    | 33    | 0,13   | 1    | K.SEISELRR.T  |
| <u>15</u> | 515.3189 | 1028.6232 | 1028.5866 | 0.0367 | 0    | 43    | 0,014  | 1    | R.VLDELTLAR.A |
| 17        | 518.7886 | 1035.5626 | 1035.5250 | 0.0377 | 1    | 27    | 0,5    | 1    | K.IRDWYQR.Q   |
| <u>18</u> | 519.2889 | 1036.5632 | 1036.5189 | 0.0444 | 0    | 30    | 0,24   | 1    | K.YETELNLR.M  |

Table S2A

|           |                 |                  |                  |               |          |           |                 |          |                                        |
|-----------|-----------------|------------------|------------------|---------------|----------|-----------|-----------------|----------|----------------------------------------|
| <u>24</u> | <b>553.7845</b> | <b>1105.5544</b> | <b>1105.5186</b> | <b>0.0359</b> | <b>0</b> | <b>66</b> | <b>6.9e-005</b> | <b>1</b> | <b>K.VTMQNLNDR.L + Oxidation (M)</b>   |
| <u>25</u> | <b>553.8028</b> | <b>1105.5910</b> | <b>1105.5549</b> | <b>0.0361</b> | <b>0</b> | <b>54</b> | <b>0.0009</b>   | <b>1</b> | <b>R.ISSVLGGSCRA</b>                   |
| 28        | 561.8143        | 1121.6140        | 1121.5717        | 0.0424        | 0        | 52        | 0.0016          | 1        | R.LEQEIATYR.R                          |
| <u>32</u> | <b>610.8260</b> | <b>1219.6374</b> | <b>1219.5932</b> | <b>0.0443</b> | <b>0</b> | <b>74</b> | <b>9e-006</b>   | <b>1</b> | <b>K.ASLENSLEETK.G</b>                 |
| <u>42</u> | <b>629.7987</b> | <b>1257.5828</b> | <b>1257.5408</b> | <b>0.0421</b> | <b>0</b> | <b>43</b> | <b>0.012</b>    | <b>1</b> | <b>K.NHEEEMNALR.G + Oxidation (M)</b>  |
| <u>48</u> | <b>681.3714</b> | <b>1360.7282</b> | <b>1360.6834</b> | <b>0.0449</b> | <b>0</b> | <b>95</b> | <b>7.7e-008</b> | <b>1</b> | <b>R.EVATNSSELVQSGK.S</b>              |
| 51        | 690.3946        | 1378.7746        | 1378.7204        | 0.0542        | 1        | 64        | 9.3e-005        | 1        | K.TRLEQEIATYR.R                        |
| <u>53</u> | <b>462.8973</b> | <b>1385.6701</b> | <b>1385.6357</b> | <b>0.0344</b> | <b>1</b> | <b>38</b> | <b>0.03</b>     | <b>1</b> | <b>K.KNHEEEMNALR.G + Oxidation (M)</b> |
| <u>59</u> | <b>751.8244</b> | <b>1501.6342</b> | <b>1501.5813</b> | <b>0.0529</b> | <b>0</b> | <b>89</b> | <b>2.7e-007</b> | <b>1</b> | <b>R.CEMEQNQEYK.I + Oxidation (M)</b>  |

---

**N° in Table S1 N° spot protein identification**


---

16 854 K17 and K14

1. K1CQ\_HUMAN Mass: 48230 Score: 1487 Coverage: 39% number of peptides : 21Keratin, type I cytoskeletal 17 (Cytokeratin 17) (K17) (CK 17) (39.1).- Homo sapiens (Human).  
Check to include this hit in error tolerant search or archive report

| Query     | Observed        | Mr(expt)         | Mr(calc)         | Delta         | Miss     | Score      | Expect          | Rank     | Peptide                                |
|-----------|-----------------|------------------|------------------|---------------|----------|------------|-----------------|----------|----------------------------------------|
| <u>1</u>  | <b>404.2360</b> | <b>806.4574</b>  | <b>806.3923</b>  | <b>0.0652</b> | <b>0</b> | <b>43</b>  | <b>0.014</b>    | <b>1</b> | <b>R.LAADDRFR.T</b>                    |
| <u>5</u>  | <b>417.2530</b> | <b>832.4914</b>  | <b>832.4290</b>  | <b>0.0624</b> | <b>0</b> | <b>35</b>  | <b>0.081</b>    | <b>1</b> | <b>K.SEISELR.R</b>                     |
| <u>7</u>  | <b>487.8008</b> | <b>973.5870</b>  | <b>973.5080</b>  | <b>0.0791</b> | <b>0</b> | <b>37</b>  | <b>0.058</b>    | <b>1</b> | <b>R.TIEELQNK.I</b>                    |
| <u>8</u>  | <b>492.7920</b> | <b>983.5694</b>  | <b>983.4924</b>  | <b>0.0771</b> | <b>0</b> | <b>49</b>  | <b>0.0029</b>   | <b>1</b> | <b>R.QFTSSSSIK.G</b>                   |
| <u>9</u>  | <b>497.3239</b> | <b>992.6332</b>  | <b>992.4927</b>  | <b>0.1406</b> | <b>0</b> | <b>33</b>  | <b>0.13</b>     | <b>1</b> | <b>K.FETEQLRL</b>                      |
| 13        | 515.3411        | 1028.6676        | 1028.5866        | 0.0811        | 0        | 50         | 0.0028          | 1        | R.VLDELTLAR.A                          |
| <u>16</u> | <b>517.7889</b> | <b>1033.5632</b> | <b>1033.4975</b> | <b>0.0658</b> | <b>0</b> | <b>68</b>  | <b>3.7e-005</b> | <b>1</b> | <b>R.LSGGLGAGSCR.L</b>                 |
| <u>21</u> | <b>539.7940</b> | <b>1077.5734</b> | <b>1077.4873</b> | <b>0.0862</b> | <b>0</b> | <b>51</b>  | <b>0.0021</b>   | <b>1</b> | <b>K.ATMQNLNDR.L + Oxidation (M)</b>   |
| <u>25</u> | <b>559.3331</b> | <b>1116.6516</b> | <b>1116.5663</b> | <b>0.0854</b> | <b>0</b> | <b>66</b>  | <b>6.6e-005</b> | <b>1</b> | <b>R.TIVEEVQDGK.V</b>                  |
| 29        | 561.8388        | 1121.6630        | 1121.5717        | 0.0914        | 0        | 54         | 0.00094         | 1        | R.LEQEIATYR.R                          |
| <u>32</u> | <b>593.3966</b> | <b>1184.7786</b> | <b>1184.6877</b> | <b>0.0910</b> | <b>1</b> | <b>52</b>  | <b>0.0013</b>   | <b>1</b> | <b>R.RVDELTLAR.A</b>                   |
| <u>33</u> | <b>593.8734</b> | <b>1185.7322</b> | <b>1185.6353</b> | <b>0.0969</b> | <b>0</b> | <b>47</b>  | <b>0.0054</b>   | <b>1</b> | <b>R.LSVEADINGLR.R</b>                 |
| 38        | 611.8728        | 1221.7310        | 1221.6353        | 0.0957        | 1        | 71         | 1.8e-005        | 1        | R.TKFETEQLRL                           |
| <u>44</u> | <b>629.8298</b> | <b>1257.6450</b> | <b>1257.5408</b> | <b>0.1043</b> | <b>0</b> | <b>48</b>  | <b>0.0036</b>   | <b>1</b> | <b>K.NHEEEMNALR.G + Oxidation (M)</b>  |
| <u>48</u> | <b>448.2847</b> | <b>1341.8323</b> | <b>1341.7364</b> | <b>0.0958</b> | <b>1</b> | <b>37</b>  | <b>0.037</b>    | <b>1</b> | <b>R.LSVEADINGLR.V</b>                 |
| <u>51</u> | <b>673.4006</b> | <b>1344.7866</b> | <b>1344.6772</b> | <b>0.1094</b> | <b>0</b> | <b>100</b> | <b>2.2e-008</b> | <b>1</b> | <b>R.ALEEANTELEVK.I</b>                |
| 58        | 681.3838        | 1360.7530        | 1360.6834        | 0.0696        | 0        | 109        | 2.8e-009        | 1        | R.EVATNSSELVQSGK.S                     |
| <u>63</u> | <b>690.4233</b> | <b>1378.8320</b> | <b>1378.7204</b> | <b>0.1116</b> | <b>1</b> | <b>75</b>  | <b>6e-006</b>   | <b>1</b> | <b>K.TRLEQEIATYR.R</b>                 |
| <u>64</u> | <b>462.9176</b> | <b>1385.7310</b> | <b>1385.6357</b> | <b>0.0953</b> | <b>1</b> | <b>68</b>  | <b>3.4e-005</b> | <b>1</b> | <b>K.KNHEEEMNALR.G + Oxidation (M)</b> |
| 66        | 702.3848        | 1402.7550        | 1402.6688        | 0.0863        | 0        | 106        | 4.6e-009        | 1        | K.ASLEGNLAETENRY                       |
| <u>70</u> | <b>751.8578</b> | <b>1501.7010</b> | <b>1501.5813</b> | <b>0.1197</b> | <b>0</b> | <b>89</b>  | <b>2.7e-007</b> | <b>1</b> | <b>R.CEMEQNQEYK.I + Oxidation (M)</b>  |

KRHUE Mass: 51916 Score: 792 Coverage: 20%

keratin 14, type I, cytoskeletal - human

Check to include this hit in error tolerant search or archive report

number of peptides : 12 with 2 specific for K14 in comparison with K17

16

| Query     | Observed        | Mr(expt)         | Mr(calc)         | Delta         | Miss     | Score      | Expect          | Rank     | Peptide                                |
|-----------|-----------------|------------------|------------------|---------------|----------|------------|-----------------|----------|----------------------------------------|
| <u>1</u>  | 404.2360        | 806.4574         | 806.3923         | 0.0652        | 0        | 43         | 0.014           | 1        | R.LAADDRFR.T                           |
| 5         | 417.2530        | 832.4914         | 832.4290         | 0.0624        | 0        | 35         | 0.081           | 1        | K.SEISELR.R                            |
| <u>13</u> | <b>515.3411</b> | <b>1028.6676</b> | <b>1028.5866</b> | <b>0.0811</b> | <b>0</b> | <b>50</b>  | <b>0.0028</b>   | <b>1</b> | <b>R.VLDELTLAR.A</b>                   |
| <u>22</u> | <b>553.8110</b> | <b>1105.6074</b> | <b>1105.5186</b> | <b>0.0888</b> | <b>0</b> | <b>86</b>  | <b>7e-007</b>   | <b>1</b> | <b>K.VTMQNLNDR.L + Oxidation (M)</b>   |
| 29        | 561.8388        | 1121.6630        | 1121.5717        | 0.0914        | 0        | 54         | 0.00094         | 1        | R.LEQEIATYR.R                          |
| <u>32</u> | <b>593.3966</b> | <b>1184.7786</b> | <b>1184.6877</b> | <b>0.0910</b> | <b>1</b> | <b>52</b>  | <b>0.0013</b>   | <b>1</b> | <b>R.RVDELTLAR.A</b>                   |
| <u>35</u> | <b>610.8543</b> | <b>1219.6940</b> | <b>1219.5932</b> | <b>0.1009</b> | <b>0</b> | <b>75</b>  | <b>6.8e-006</b> | <b>1</b> | <b>K.ASLENSLEETK.G</b>                 |
| 44        | 629.8298        | 1257.6450        | 1257.5408        | 0.1043        | 0        | 48         | 0.0036          | 1        | K.NHEEEMNALR.G + Oxidation (M)         |
| <u>58</u> | <b>681.3838</b> | <b>1360.7530</b> | <b>1360.6834</b> | <b>0.0696</b> | <b>0</b> | <b>109</b> | <b>2.8e-009</b> | <b>1</b> | <b>R.EVATNSSELVQSGK.S</b>              |
| <u>63</u> | <b>690.4233</b> | <b>1378.8320</b> | <b>1378.7204</b> | <b>0.1116</b> | <b>1</b> | <b>75</b>  | <b>6e-006</b>   | <b>1</b> | <b>K.TRLEQEIATYR.R</b>                 |
| <u>64</u> | <b>462.9176</b> | <b>1385.7310</b> | <b>1385.6357</b> | <b>0.0953</b> | <b>1</b> | <b>68</b>  | <b>3.4e-005</b> | <b>1</b> | <b>K.KNHEEEMNALR.G + Oxidation (M)</b> |
| 70        | 751.8578        | 1501.7010        | 1501.5813        | 0.1197        | 0        | 89         | 2.7e-007        | 1        | R.CEMEQNQEYK.I + Oxidation (M)         |

---

**N° in Table S1 N° spot protein identification**


---

17 1054 K17 and K14

1. K1CQ\_HUMAN Mass: 48230 Score: 1195 Coverage: 43% number of peptides : 23Keratin, type I cytoskeletal 17 (Cytokeratin 17) (K17) (CK 17) (39.1).- Homo sapiens (Human).  
Check to include this hit in error tolerant search or archive report

| Query    | Observed        | Mr(expt)        | Mr(calc)        | Delta          | Miss     | Score     | Expect        | Rank     | Peptide              |
|----------|-----------------|-----------------|-----------------|----------------|----------|-----------|---------------|----------|----------------------|
| <u>1</u> | <b>404.1989</b> | <b>806.3832</b> | <b>806.3923</b> | <b>-0.0090</b> | <b>0</b> | <b>43</b> | <b>0.015</b>  | <b>1</b> | <b>R.LAADDRFR.T</b>  |
| <u>2</u> | <b>405.2188</b> | <b>808.4230</b> | <b>808.4330</b> | <b>-0.0100</b> | <b>0</b> | <b>24</b> | <b>0.98</b>   | <b>1</b> | <b>R.LASYLDK.V</b>   |
| <u>7</u> | <b>487.7562</b> | <b>973.4978</b> | <b>973.5080</b> | <b>-0.0101</b> | <b>0</b> | <b>31</b> | <b>0.24</b>   | <b>1</b> | <b>R.TIEELQNK.I</b>  |
| <u>9</u> | <b>492.7485</b> | <b>983.4824</b> | <b>983.4924</b> | <b>-0.0099</b> | <b>0</b> | <b>52</b> | <b>0.0016</b> | <b>1</b> | <b>R.QFTSSSSIK.G</b> |

Table S2A

|    |          |           |           |         |   |     |          |   |                                 |
|----|----------|-----------|-----------|---------|---|-----|----------|---|---------------------------------|
| 12 | 495.2681 | 988.5216  | 988.5301  | -0.0085 | 1 | 36  | 0.069    | 1 | K.SEISELRR.T                    |
| 13 | 497.2530 | 992.4914  | 992.4927  | -0.0012 | 0 | 35  | 0.078    | 1 | K.FETEQLR.L                     |
| 14 | 497.7109 | 993.4072  | 993.4192  | -0.0119 | 0 | 30  | 0.23     | 1 | R.DYSQYR.T                      |
| 16 | 515.2944 | 1028.5742 | 1028.5866 | -0.0123 | 0 | 44  | 0.01     | 1 | R.VLDELTLAR.A                   |
| 17 | 517.7523 | 1033.4900 | 1033.4975 | -0.0074 | 0 | 63  | 0.00012  | 1 | R.LSGGLGAGSCR.L                 |
| 18 | 518.7648 | 1035.5150 | 1035.5250 | -0.0099 | 1 | 33  | 0.12     | 1 | K.IRDWYQR.Q                     |
| 22 | 531.7476 | 1061.4806 | 1061.4924 | -0.0117 | 0 | 63  | 0.00013  | 1 | K.ATMQNLNDR.L                   |
| 28 | 559.2860 | 1116.5574 | 1116.5663 | -0.0088 | 0 | 62  | 0.00017  | 1 | R.TIVEEVDGK.V                   |
| 29 | 561.7889 | 1121.5632 | 1121.5717 | -0.0084 | 0 | 61  | 0.00018  | 1 | R.LEQEIATYR.R                   |
| 30 | 593.3457 | 1184.6768 | 1184.6877 | -0.0109 | 1 | 75  | 7.9e-006 | 1 | R.RVLDELTLAR.A                  |
| 34 | 611.8211 | 1221.6276 | 1221.6353 | -0.0077 | 1 | 66  | 4.9e-005 | 1 | R.TKFETEQLR.L                   |
| 38 | 629.7746 | 1257.5346 | 1257.5408 | -0.0061 | 0 | 36  | 0.055    | 1 | K.NHEEEMNALR.G + Oxidation (M)  |
| 42 | 673.3407 | 1344.6668 | 1344.6772 | -0.0104 | 0 | 100 | 2.2e-008 | 1 | R.ALEEANTELEVK.I                |
| 45 | 681.3314 | 1360.6482 | 1360.6834 | -0.0352 | 0 | 89  | 2.9e-007 | 1 | R.EVATNSLVQSGK.S                |
| 49 | 690.3664 | 1378.7182 | 1378.7204 | -0.0022 | 1 | 75  | 6.1e-006 | 1 | K.TRLEQEIATYR.R                 |
| 50 | 462.8745 | 1385.6017 | 1385.6357 | -0.0340 | 1 | 44  | 0.0073   | 1 | K.KNHEEEMNALR.G + Oxidation (M) |
| 51 | 702.3365 | 1402.6584 | 1402.6688 | -0.0103 | 0 | 129 | 2.6e-011 | 1 | K.ASLEGNLAETENR.Y               |
| 55 | 751.7926 | 1501.5706 | 1501.5813 | -0.0107 | 0 | 89  | 2.5e-007 | 1 | R.CEMEQNQEYK.I + Oxidation (M)  |
| 59 | 548.9495 | 1643.8267 | 1643.8519 | -0.0252 | 1 | 61  | 0.00013  | 1 | R.LLEGDAHLTQYK.E                |

KRHUE Mass: 51916 Score: 728 Coverage: 22%  
 keratin 14, type I, cytoskeletal - human

number of peptides : 14 with 2 specific for K14 in comparison with K17

17

Check to include this hit in error tolerant search or archive report

| Query | Observed | Mr(expt)  | Mr(calc)  | Delta   | Miss | Score | Expect   | Rank | Peptide                         |
|-------|----------|-----------|-----------|---------|------|-------|----------|------|---------------------------------|
| 1     | 404.1989 | 806.3832  | 806.3923  | -0.0090 | 0    | 43    | 0.015    | 1    | R.LAADDRF.T                     |
| 2     | 405.2188 | 808.4230  | 808.4330  | -0.0100 | 0    | 24    | 0.98     | 1    | R.LASYLDK.V                     |
| 12    | 495.2681 | 988.5216  | 988.5301  | -0.0085 | 1    | 36    | 0.069    | 1    | K.SEISELRR.T                    |
| 16    | 515.2944 | 1028.5742 | 1028.5866 | -0.0123 | 0    | 44    | 0.01     | 1    | R.VLDELTLAR.A                   |
| 18    | 518.7648 | 1035.5150 | 1035.5250 | -0.0099 | 1    | 33    | 0.12     | 1    | K.IRDWYQR.Q                     |
| 26    | 553.7802 | 1105.5458 | 1105.5550 | -0.0091 | 0    | 47    | 0.0055   | 1    | R.ISSVLGAGSCR.A                 |
| 29    | 561.7889 | 1121.5632 | 1121.5717 | -0.0084 | 0    | 61    | 0.00018  | 1    | R.LEQEIATYR.R                   |
| 30    | 593.3457 | 1184.6768 | 1184.6877 | -0.0109 | 1    | 75    | 7.9e-006 | 1    | R.RVLDELTLAR.A                  |
| 31    | 610.8000 | 1219.5854 | 1219.5932 | -0.0077 | 0    | 94    | 9.2e-008 | 1    | K.ASLENSLEETK.G                 |
| 38    | 629.7746 | 1257.5346 | 1257.5408 | -0.0061 | 0    | 36    | 0.055    | 1    | K.NHEEEMNALR.G + Oxidation (M)  |
| 45    | 681.3314 | 1360.6482 | 1360.6834 | -0.0352 | 0    | 89    | 2.9e-007 | 1    | R.EVATNSLVQSGK.S                |
| 49    | 690.3664 | 1378.7182 | 1378.7204 | -0.0022 | 1    | 75    | 6.1e-006 | 1    | K.TRLEQEIATYR.R                 |
| 50    | 462.8745 | 1385.6017 | 1385.6357 | -0.0340 | 1    | 44    | 0.0073   | 1    | K.KNHEEEMNALR.G + Oxidation (M) |
| 55    | 751.7926 | 1501.5706 | 1501.5813 | -0.0107 | 0    | 89    | 2.5e-007 | 1    | R.CEMEQNQEYK.I + Oxidation (M)  |

N° in Table S1 N° spot protein identification

18 986 K17 and K14 and K16

1. K1CQ HUMAN Mass: 48230 Score: 751 Coverage: 40%

number of peptides : 19

Keratin, type I cytoskeletal 17 (Cytokeratin 17) (K17) (CK 17) (39.1)- Homo sapiens (Human).

Check to include this hit in error tolerant search or archive report

| Query | Observed | Mr(expt)  | Mr(calc)  | Delta   | Miss | Score | Expect   | Rank | Peptide                         |
|-------|----------|-----------|-----------|---------|------|-------|----------|------|---------------------------------|
| 1     | 404.2005 | 806.3864  | 806.3923  | -0.0058 | 0    | 40    | 0.029    | 1    | R.LAADDRF.T                     |
| 2     | 405.2203 | 808.4260  | 808.4330  | -0.0070 | 0    | 44    | 0.01     | 1    | R.LASYLDK.V                     |
| 9     | 487.7583 | 973.5020  | 973.5080  | -0.0059 | 0    | 32    | 0.19     | 1    | R.TIEELQNK.I                    |
| 11    | 492.7505 | 983.4864  | 983.4924  | -0.0059 | 0    | 49    | 0.0028   | 1    | R.QFTSSSSIK.G                   |
| 12    | 495.2688 | 988.5230  | 988.5301  | -0.0071 | 1    | 38    | 0.043    | 1    | K.SEISELRR.T                    |
| 14    | 515.2975 | 1028.5804 | 1028.5866 | -0.0061 | 0    | 46    | 0.0067   | 1    | R.VLDELTLAR.A                   |
| 15    | 517.7520 | 1033.4894 | 1033.4975 | -0.0080 | 0    | 56    | 0.00065  | 1    | R.LSGGLGAGSCR.L                 |
| 16    | 518.7676 | 1035.5206 | 1035.5250 | -0.0043 | 1    | 32    | 0.14     | 1    | K.IRDWYQR.Q                     |
| 22    | 532.8054 | 1063.5962 | 1063.6026 | -0.0063 | 1    | 28    | 0.37     | 1    | R.LASYLDKVR.A                   |
| 24    | 539.7459 | 1077.4772 | 1077.4873 | -0.0100 | 0    | 67    | 5.3e-005 | 1    | K.ATMQNLNDR.L + Oxidation (M)   |
| 28    | 559.2867 | 1116.5588 | 1116.5663 | -0.0074 | 0    | 66    | 6.2e-005 | 1    | R.TIVEEVDGK.V                   |
| 30    | 561.7925 | 1121.5704 | 1121.5717 | -0.0012 | 0    | 61    | 0.00022  | 1    | R.LEQEIATYR.R                   |
| 34    | 611.8231 | 1221.6316 | 1221.6353 | -0.0037 | 1    | 52    | 0.0015   | 1    | R.TKFETEQLR.L                   |
| 38    | 629.7725 | 1257.5304 | 1257.5408 | -0.0103 | 0    | 48    | 0.0037   | 1    | K.NHEEEMNALR.G + Oxidation (M)  |
| 44    | 673.3444 | 1344.6742 | 1344.6772 | -0.0030 | 0    | 89    | 2.8e-007 | 1    | R.ALEEANTELEVK.I                |
| 46    | 681.3449 | 1360.6752 | 1360.6834 | -0.0082 | 0    | 92    | 1.5e-007 | 1    | R.EVATNSLVQSGK.S                |
| 51    | 702.3395 | 1402.6644 | 1402.6688 | -0.0043 | 0    | 78    | 3.1e-006 | 1    | K.ASLEGNLAETENR.Y               |
| 52    | 485.5635 | 1453.6687 | 1453.6871 | -0.0184 | 1    | 47    | 0.0035   | 1    | R.ILNEMRDQYEK.M + Oxidation (M) |
| 56    | 751.7924 | 1501.5702 | 1501.5813 | -0.0111 | 0    | 89    | 2.6e-007 | 1    | R.CEMEQNQEYK.I + Oxidation (M)  |

KRHUE Mass: 51916 Score: 523 Coverage: 26%

number of peptides : 14 with 3 specific for K14 in comparison with K17

Table S2A

18

keratin 14, type I, cytoskeletal - human

## 2. Check to include this hit in error tolerant search or archive report

| Query     | Observed        | Mr(expt)         | Mr(calc)         | Delta          | Miss     | Score     | Expect          | Rank     | Peptide                              |
|-----------|-----------------|------------------|------------------|----------------|----------|-----------|-----------------|----------|--------------------------------------|
| <u>1</u>  | 404.2005        | 806.3864         | 806.3923         | -0.0058        | 0        | 40        | 0.029           | 1        | R.LAADDFR.T                          |
| <u>2</u>  | 405.2203        | 808.4260         | 808.4330         | -0.0070        | 0        | 44        | 0.01            | 1        | R.LASYLDK.V                          |
| <u>12</u> | 495.2688        | 988.5230         | 988.5301         | -0.0071        | 1        | 38        | 0.043           | 1        | K.SEISELRR.T                         |
| <u>14</u> | 515.2975        | 1028.5804        | 1028.5866        | -0.0061        | 0        | 46        | 0.0067          | 1        | R.VLDELTLAR.A                        |
| <u>16</u> | 518.7676        | 1035.5206        | 1035.5250        | -0.0043        | 1        | 32        | 0.14            | 1        | K.IRDWYQR.Q                          |
| <u>22</u> | 532.8054        | 1063.5962        | 1063.6026        | -0.0063        | 1        | 28        | 0.37            | 1        | R.LASYLDKVR.A                        |
| <u>25</u> | <b>553.7610</b> | <b>1105.5074</b> | <b>1105.5186</b> | <b>-0.0112</b> | <b>0</b> | <b>86</b> | <b>6.5e-007</b> | <b>1</b> | <b>K.VTMQNLNDR.L + Oxidation (M)</b> |
| <u>26</u> | <b>553.7827</b> | <b>1105.5508</b> | <b>1105.5550</b> | <b>-0.0041</b> | <b>0</b> | <b>45</b> | <b>0.008</b>    | <b>1</b> | <b>R.ISSVLGGSCR.A</b>                |
| <u>30</u> | 561.7925        | 1121.5704        | 1121.5717        | -0.0012        | 0        | 61        | 0.00022         | 1        | R.LEQEIATYR.R                        |
| <u>33</u> | <b>610.8013</b> | <b>1219.5880</b> | <b>1219.5932</b> | <b>-0.0051</b> | <b>0</b> | <b>69</b> | <b>3.2e-005</b> | <b>1</b> | <b>K.ASLENSLEETK.G</b>               |
| <u>38</u> | 629.7725        | 1257.5304        | 1257.5408        | -0.0103        | 0        | 48        | 0.0037          | 1        | K.NHEEEMNALR.G + Oxidation (M)       |
| <u>46</u> | 681.3449        | 1360.6752        | 1360.6834        | -0.0082        | 0        | 92        | 1.5e-007        | 1        | R.EVATNSSELVQSGK.S                   |
| <u>52</u> | 485.5635        | 1453.6687        | 1453.6871        | -0.0184        | 1        | 47        | 0.0035          | 1        | R.ILNEMRDOYEK.M + Oxidation (M)      |
| <u>56</u> | 751.7924        | 1501.5702        | 1501.5813        | -0.0111        | 0        | 89        | 2.6e-007        | 1        | R.CEMEQNQYEYK.I + Oxidation (M)      |

K1CP\_HUMAN Mass: 51447 Score: 223 Coverage: 17%

Keratin, type I cytoskeletal 16 (Cytokeratin 16) (K16) (CK 16).- Homo sapiens (Human).

number of peptides :

10 with 1 specific for K16 in comparison with K14

18

## 3. Check to include this hit in error tolerant search or archive report

| Query     | Observed        | Mr(expt)         | Mr(calc)         | Delta          | Miss     | Score     | Expect        | Rank     | Peptide                       |
|-----------|-----------------|------------------|------------------|----------------|----------|-----------|---------------|----------|-------------------------------|
| <u>1</u>  | 404.2005        | 806.3864         | 806.3923         | -0.0058        | 0        | 40        | 0.029         | 1        | R.LAADDFR.T                   |
| <u>2</u>  | 405.2203        | 808.4260         | 808.4330         | -0.0070        | 0        | 44        | 0.01          | 1        | R.LASYLDK.V                   |
| <u>14</u> | 515.2975        | 1028.5804        | 1028.5866        | -0.0061        | 0        | 46        | 0.0067        | 1        | R.VLDELTLAR.T                 |
| <u>16</u> | 518.7676        | 1035.5206        | 1035.5250        | -0.0043        | 1        | 32        | 0.14          | 1        | K.IRDWYQR.Q                   |
| <u>22</u> | 532.8054        | 1063.5962        | 1063.6026        | -0.0063        | 1        | 28        | 0.37          | 1        | R.LASYLDKVR.A                 |
| <u>25</u> | 553.7610        | 1105.5074        | 1105.5186        | -0.0112        | 0        | 86        | 6.5e-007      | 1        | K.VTMQNLNDR.L + Oxidation (M) |
| <u>26</u> | 553.7827        | 1105.5508        | 1105.5550        | -0.0041        | 0        | 45        | 0.008         | 1        | R.ISSVLGGSCR.A                |
| <u>30</u> | 561.7925        | 1121.5704        | 1121.5717        | -0.0012        | 0        | 61        | 0.00022       | 1        | R.LEQEIATYR.R                 |
| <u>33</u> | 610.8013        | 1219.5880        | 1219.5932        | -0.0051        | 0        | 69        | 3.2e-005      | 1        | K.ASLENSLEETK.G               |
| <u>39</u> | <b>630.7877</b> | <b>1259.5608</b> | <b>1259.5630</b> | <b>-0.0021</b> | <b>0</b> | <b>46</b> | <b>0.0057</b> | <b>1</b> | <b>R.EVFTSSSSSSSR.Q</b>       |

N° in Table S1 N° spot protein identification

19 1046 K17 and 14

## 1. K1CQ\_HUMAN Mass: 48230 Score: 932 Coverage: 47%

Keratin, type I cytoskeletal 17 (Cytokeratin 17) (K17) (CK 17) (39.1).- Homo sapiens (Human).

number of peptides :

24

Check to include this hit in error tolerant search or archive report

| Query     | Observed | Mr(expt)  | Mr(calc)  | Delta   | Miss | Score | Expect   | Rank | Peptide                         |
|-----------|----------|-----------|-----------|---------|------|-------|----------|------|---------------------------------|
| <u>1</u>  | 404.1957 | 806.3768  | 806.3923  | -0.0154 | 0    | 31    | 0.22     | 1    | R.LAADDFR.T                     |
| <u>2</u>  | 405.2173 | 808.4200  | 808.4330  | -0.0130 | 0    | 41    | 0.019    | 1    | R.LASYLDK.V                     |
| <u>5</u>  | 417.2150 | 832.4154  | 832.4290  | -0.0136 | 0    | 26    | 0.7      | 1    | K.SEISELR.R                     |
| <u>9</u>  | 487.7504 | 973.4862  | 973.5080  | -0.0217 | 0    | 37    | 0.058    | 1    | R.TIEELQNK.I                    |
| <u>11</u> | 492.7466 | 983.4786  | 983.4924  | -0.0137 | 0    | 49    | 0.0031   | 1    | R.QFTSSSSIK.G                   |
| <u>12</u> | 495.2643 | 988.5140  | 988.5301  | -0.0161 | 1    | 36    | 0.068    | 1    | K.SEISELRR.T                    |
| <u>13</u> | 497.2630 | 992.5114  | 992.4927  | 0.0188  | 0    | 46    | 0.0063   | 1    | K.FETEQLR.L                     |
| <u>15</u> | 515.2913 | 1028.5680 | 1028.5866 | -0.0185 | 0    | 46    | 0.006    | 1    | R.VLDELTLAR.A                   |
| <u>17</u> | 517.7479 | 1033.4812 | 1033.4975 | -0.0162 | 0    | 66    | 6.4e-005 | 1    | R.LSGGLGAGSCR.L                 |
| <u>22</u> | 531.7451 | 1061.4756 | 1061.4924 | -0.0167 | 0    | 63    | 0.00014  | 1    | K.ATMQNLNDR.L                   |
| <u>26</u> | 559.2808 | 1116.5470 | 1116.5663 | -0.0192 | 0    | 61    | 0.00017  | 1    | R.TIVEEVQDGK.V                  |
| <u>29</u> | 561.7832 | 1121.5518 | 1121.5717 | -0.0198 | 0    | 36    | 0.061    | 1    | R.LEQEIATYR.R                   |
| <u>32</u> | 611.8185 | 1221.6224 | 1221.6353 | -0.0129 | 1    | 74    | 8e-006   | 1    | R.TKFETEQLR.L                   |
| <u>33</u> | 629.7666 | 1257.5186 | 1257.5408 | -0.0221 | 0    | 48    | 0.0035   | 1    | K.NHEEEMNALR.G + Oxidation (M)  |
| <u>34</u> | 660.3214 | 1318.6282 | 1318.6438 | -0.0156 | 0    | 45    | 0.0065   | 1    | R.ADLEMQIENLJ.E + Oxidation (M) |
| <u>35</u> | 671.8688 | 1341.7230 | 1341.7364 | -0.0134 | 1    | 47    | 0.0042   | 1    | R.LSVEADINGLRR.V                |
| <u>36</u> | 673.3373 | 1344.6600 | 1344.6772 | -0.0172 | 0    | 100   | 2.3e-008 | 1    | R.ALEEANTELEV.K.I               |
| <u>37</u> | 681.3411 | 1360.6676 | 1360.6834 | -0.0158 | 0    | 89    | 2.9e-007 | 1    | R.EVATNSSELVQSGK.S              |
| <u>40</u> | 690.3581 | 1378.7016 | 1378.7204 | -0.0188 | 1    | 61    | 0.00017  | 1    | K.TRLEQEIATYR.R                 |
| <u>42</u> | 702.3337 | 1402.6528 | 1402.6688 | -0.0159 | 0    | 97    | 3.7e-008 | 1    | K.ASLEGNLAETENR.Y               |
| <u>44</u> | 727.8416 | 1453.6686 | 1453.6871 | -0.0184 | 1    | 52    | 0.0013   | 1    | R.ILNEMRDQYEK.M + Oxidation (M) |
| <u>45</u> | 743.7952 | 1485.5758 | 1485.5864 | -0.0105 | 0    | 90    | 2.1e-007 | 1    | R.CEMEQNQYEYK.I                 |
| <u>48</u> | 758.8800 | 1515.7454 | 1515.7569 | -0.0114 | 0    | 100   | 2e-008   | 1    | R.LLEGEDAHLTQYK.K               |
| <u>49</u> | 548.9440 | 1643.8102 | 1643.8519 | -0.0417 | 1    | 69    | 2.5e-005 | 1    | R.LLEGEDAHLTQYK.E               |

KRHUE Mass: 51916 Score: 400 Coverage: 22%

number of peptides :

13 with 2 specific for K14 in comparison with K17



Table S2A

19

keratin 14, type I, cytoskeletal - human

Check to include this hit in error tolerant search or archive report

| Query     | Observed        | Mr(expt)         | Mr(calc)         | Delta          | Miss     | Score     | Expect       | Rank     | Peptide                              |
|-----------|-----------------|------------------|------------------|----------------|----------|-----------|--------------|----------|--------------------------------------|
| <u>1</u>  | 404.1957        | 806.3768         | 806.3923         | -0.0154        | 0        | 31        | 0.22         | 1        | R.LAADDFR.T                          |
| <u>2</u>  | 405.2173        | 808.4200         | 808.4330         | -0.0130        | 0        | 41        | 0.019        | 1        | R.LASYLDK.V                          |
| <u>5</u>  | 417.2150        | 832.4154         | 832.4290         | -0.0136        | 0        | 26        | 0.7          | 1        | K.SEISELR.R                          |
| <u>12</u> | 495.2643        | 988.5140         | 988.5301         | -0.0161        | 1        | 36        | 0.068        | 1        | K.SEISELRR.T                         |
| <u>15</u> | 515.2913        | 1028.5680        | 1028.5866        | -0.0185        | 0        | 46        | 0.006        | 1        | R.VLDELTLAR.A                        |
| <u>23</u> | <b>553.7594</b> | <b>1105.5042</b> | <b>1105.5186</b> | <b>-0.0144</b> | <b>0</b> | <b>43</b> | <b>0.013</b> | <b>1</b> | <b>K.VTMQNLNDR.L + Oxidation (M)</b> |
| <u>24</u> | <b>553.7761</b> | <b>1105.5376</b> | <b>1105.5550</b> | <b>-0.0173</b> | <b>0</b> | <b>49</b> | <b>0.003</b> | <b>1</b> | <b>R.ISSVLAGGSCR.A</b>               |
| <u>29</u> | 561.7832        | 1121.5518        | 1121.5717        | -0.0198        | 0        | 36        | 0.061        | 1        | R.LEQEIATYR.R                        |
| <u>33</u> | 629.7666        | 1257.5186        | 1257.5408        | -0.0221        | 0        | 48        | 0.0035       | 1        | K.NHEEEMNALR.G + Oxidation (M)       |
| <u>37</u> | 681.3411        | 1360.6676        | 1360.6834        | -0.0158        | 0        | 89        | 2.9e-007     | 1        | R.EVATNSLVQSGK.S                     |
| <u>40</u> | 690.3581        | 1378.7016        | 1378.7204        | -0.0188        | 1        | 61        | 0.00017      | 1        | K.TRLEQEIATYR.R                      |
| <u>44</u> | 727.8416        | 1453.6686        | 1453.6871        | -0.0184        | 1        | 52        | 0.0013       | 1        | R.ILNEMRDOYEK.M + Oxidation (M)      |
| <u>45</u> | 743.7952        | 1485.5758        | 1485.5864        | -0.0105        | 0        | 90        | 2.1e-007     | 1        | R.CEMEQQNQEQYK.I                     |

## N° in Table S1 N° spot protein identification

20 821 K14 and K17

K1CN\_HUMAN Mass: 51744 Score: 565 Coverage: 28%

Keratin, type I cytoskeletal 14 (Cytokeratin 14) (K14) (CK 14).- Homo sapiens (Human).

Check to include this hit in error tolerant search or archive report

number of peptides :

14

20

| Query     | Observed        | Mr(expt)         | Mr(calc)         | Delta          | Miss     | Score     | Expect          | Rank     | Peptide                    |
|-----------|-----------------|------------------|------------------|----------------|----------|-----------|-----------------|----------|----------------------------|
| <u>2</u>  | 404.1964        | 806.3782         | 806.3923         | -0.0140        | 0        | 34        | 0.11            | 1        | R.LAADDFR.T                |
| <u>3</u>  | 405.2180        | 808.4214         | 808.4330         | -0.0116        | 0        | 24        | 0.9             | 1        | R.LASYLDK.V                |
| <u>15</u> | 515.2958        | 1028.5770        | 1028.5866        | -0.0095        | 0        | 42        | 0.016           | 1        | R.VLDELTLAR.A              |
| <u>18</u> | 532.8032        | 1063.5918        | 1063.6026        | -0.0107        | 1        | 49        | 0.0028          | 1        | R.LASYLDKVR.A              |
| <u>19</u> | <b>545.7590</b> | <b>1089.5034</b> | <b>1089.5237</b> | <b>-0.0202</b> | <b>0</b> | <b>62</b> | <b>0.00015</b>  | <b>1</b> | <b>K.VTMQNLNDR.L</b>       |
| <u>25</u> | <b>553.7770</b> | <b>1105.5394</b> | <b>1105.5550</b> | <b>-0.0155</b> | <b>0</b> | <b>42</b> | <b>0.016</b>    | <b>1</b> | <b>R.ISSVLAGGSCR.A</b>     |
| <u>38</u> | <b>610.7980</b> | <b>1219.5814</b> | <b>1219.5932</b> | <b>-0.0117</b> | <b>0</b> | <b>39</b> | <b>0.03</b>     | <b>1</b> | <b>K.ASLENSLEETK.G</b>     |
| <u>44</u> | <b>633.8361</b> | <b>1265.6576</b> | <b>1265.6615</b> | <b>-0.0039</b> | <b>1</b> | <b>45</b> | <b>0.0063</b>   | <b>1</b> | <b>R.TKYETELNLR.M</b>      |
| <u>45</u> | <b>639.7897</b> | <b>1277.5648</b> | <b>1277.5783</b> | <b>-0.0134</b> | <b>0</b> | <b>41</b> | <b>0.017</b>    | <b>1</b> | <b>K.GSCGIGGGIGGSSR.I</b>  |
| <u>47</u> | 651.3268        | 1300.6390        | 1300.6510        | -0.0120        | 0        | 118       | 3.5e-010        | 1        | R.ALEEANADLEVK.I           |
| <u>48</u> | <b>681.3401</b> | <b>1360.6656</b> | <b>1360.6834</b> | <b>-0.0178</b> | <b>0</b> | <b>89</b> | <b>3.2e-007</b> | <b>1</b> | <b>R.EVATNSLVQSGK.S</b>    |
| <u>50</u> | 690.3669        | 1378.7192        | 1378.7204        | -0.0012        | 1        | 39        | 0.029           | 1        | K.TRLEQEIATYR.R            |
| <u>54</u> | <b>713.3475</b> | <b>1424.6804</b> | <b>1424.6896</b> | <b>-0.0091</b> | <b>0</b> | <b>91</b> | <b>1.7e-007</b> | <b>1</b> | <b>R.APSTYGGGLSVSSSR.F</b> |
| <u>56</u> | <b>478.5715</b> | <b>1432.6927</b> | <b>1432.7157</b> | <b>-0.0231</b> | <b>1</b> | <b>96</b> | <b>4.7e-008</b> | <b>1</b> | <b>K.ASLENSLEETKGR.Y</b>   |

K1CO\_HUMAN Mass: 48230 Score: 147 Coverage: 17%

Keratin, type I cytoskeletal 17 (Cytokeratin 17) (K17) (CK 17) (39.1).- Homo sapiens (Human).

Check to include this hit in error tolerant search or archive report

number of peptides :

8 with 2 specific for K17 in comparison with K14

20

| Query     | Observed        | Mr(expt)         | Mr(calc)         | Delta          | Miss     | Score     | Expect      | Rank     | Peptide                                      |
|-----------|-----------------|------------------|------------------|----------------|----------|-----------|-------------|----------|----------------------------------------------|
| <u>2</u>  | 404.1964        | 806.3782         | 806.3923         | -0.0140        | 0        | 34        | 0.11        | 1        | R.LAADDFR.T                                  |
| <u>3</u>  | 405.2180        | 808.4214         | 808.4330         | -0.0116        | 0        | 24        | 0.9         | 1        | R.LASYLDK.V                                  |
| <u>15</u> | 515.2958        | 1028.5770        | 1028.5866        | -0.0095        | 0        | 42        | 0.016       | 1        | R.VLDELTLAR.A                                |
| <u>18</u> | 532.8032        | 1063.5918        | 1063.6026        | -0.0107        | 1        | 49        | 0.0028      | 1        | R.LASYLDKVR.A                                |
| <u>32</u> | <b>572.7475</b> | <b>1143.4804</b> | <b>1143.4873</b> | <b>-0.0068</b> | <b>0</b> | <b>33</b> | <b>0.13</b> | <b>1</b> | <b>K.DAEDWFFSK.T</b>                         |
| <u>48</u> | 681.3401        | 1360.6656        | 1360.6834        | -0.0178        | 0        | 89        | 3.2e-007    | 1        | R.EVATNSLVQSGK.S                             |
| <u>50</u> | 690.3669        | 1378.7192        | 1378.7204        | -0.0012        | 1        | 39        | 0.029       | 1        | K.TRLEQEIATYR.R                              |
| <u>69</u> | <b>941.4813</b> | <b>1880.9480</b> | <b>1880.9223</b> | <b>0.0257</b>  | <b>0</b> | <b>39</b> | <b>0.02</b> | <b>1</b> | <b>R.TMQALEIQLSQLSMK.A + 2 Oxidation (M)</b> |

## N° in Table S1 N° spot protein identification

21 1023 K14

K1CN\_HUMAN Mass: 51744 Score: 2093 Coverage: 46%

Keratin, type I cytoskeletal 14 (Cytokeratin 14) (K14) (CK 14).- Homo sapiens (Human).

Check to include this hit in error tolerant search or archive report

number of peptides :

26

21

| Query     | Observed        | Mr(expt)         | Mr(calc)         | Delta          | Miss     | Score     | Expect          | Rank     | Peptide                              |
|-----------|-----------------|------------------|------------------|----------------|----------|-----------|-----------------|----------|--------------------------------------|
| <u>1</u>  | <b>405.2167</b> | <b>808.4188</b>  | <b>808.4330</b>  | <b>-0.0142</b> | <b>0</b> | <b>41</b> | <b>0.019</b>    | <b>1</b> | <b>R.LASYLDK.V</b>                   |
| <u>2</u>  | <b>417.2251</b> | <b>832.4356</b>  | <b>832.4290</b>  | <b>0.0066</b>  | <b>0</b> | <b>31</b> | <b>0.22</b>     | <b>1</b> | <b>K.SEISELR.R</b>                   |
| <u>3</u>  | <b>421.2540</b> | <b>840.4934</b>  | <b>840.4817</b>  | <b>0.0117</b>  | <b>0</b> | <b>35</b> | <b>0.062</b>    | <b>1</b> | <b>R.QRPAAIK.D</b>                   |
| <u>7</u>  | 501.7215        | 1001.4284        | 1001.4488        | -0.0203        | 0        | 66        | 6.7e-005        | 1        | R.QFTSSSSMK.G                        |
| <u>13</u> | 515.3062        | 1028.5978        | 1028.5866        | 0.0113         | 0        | 46        | 0.0067          | 1        | R.VLDELTLAR.A                        |
| <u>21</u> | 518.7637        | 1035.5128        | 1035.5250        | -0.0121        | 1        | 36        | 0.063           | 1        | K.IRDWYQR.Q                          |
| <u>22</u> | 519.2715        | 1036.5284        | 1036.5189        | 0.0096         | 0        | 56        | 0.00062         | 1        | K.YETELNLR.M                         |
| <u>27</u> | <b>553.7750</b> | <b>1105.5354</b> | <b>1105.5186</b> | <b>0.0168</b>  | <b>0</b> | <b>86</b> | <b>6.3e-007</b> | <b>1</b> | <b>K.VTMQNLNDR.L + Oxidation (M)</b> |
| <u>33</u> | <b>553.7892</b> | <b>1105.5638</b> | <b>1105.5550</b> | <b>0.0089</b>  | <b>0</b> | <b>57</b> | <b>0.00052</b>  | <b>1</b> | <b>R.ISSVLAGGSCR.A</b>               |
| <u>34</u> | <b>561.7873</b> | <b>1121.5600</b> | <b>1121.5717</b> | <b>-0.0116</b> | <b>0</b> | <b>62</b> | <b>0.00016</b>  | <b>1</b> | <b>R.LEQEIATYR.R</b>                 |
| <u>37</u> | <b>584.3348</b> | <b>1166.6550</b> | <b>1166.6408</b> | <b>0.0143</b>  | <b>0</b> | <b>71</b> | <b>1.8e-005</b> | <b>1</b> | <b>K.VVSTHEQVLR.T</b>                |

Table S2A

|    |          |           |           |         |   |     |          |   |                                 |
|----|----------|-----------|-----------|---------|---|-----|----------|---|---------------------------------|
| 38 | 586.7756 | 1171.5366 | 1171.5186 | 0.0181  | 0 | 24  | 0.86     | 1 | K.DAEWFFTK.T                    |
| 40 | 593.3602 | 1184.7058 | 1184.6877 | 0.0181  | 1 | 73  | 1.2e-005 | 1 | R.RVLDLTLAR.A                   |
| 47 | 610.7772 | 1219.5398 | 1219.5932 | -0.0533 | 0 | 98  | 4.1e-008 | 1 | K.ASLENSLEETK.G                 |
| 49 | 610.8097 | 1219.6048 | 1219.5867 | 0.0182  | 0 | 62  | 0.00016  | 1 | R.MSVEADINGLR.R + Oxidation (M) |
| 60 | 629.7902 | 1257.5658 | 1257.5408 | 0.0251  | 0 | 63  | 0.00012  | 1 | K.NHEEEMNALR.G + Oxidation (M)  |
| 63 | 422.8939 | 1265.6599 | 1265.6615 | -0.0017 | 1 | 75  | 7.2e-006 | 1 | R.TKYETELNLR.M                  |
| 66 | 638.8353 | 1275.6560 | 1275.6380 | 0.0180  | 0 | 77  | 4.4e-006 | 1 | R.ADLEMQESLK.E                  |
| 67 | 639.7905 | 1277.5664 | 1277.5783 | -0.0118 | 0 | 85  | 7.6e-007 | 1 | K.GSCGIGGGGGSSR.I               |
| 70 | 651.3383 | 1300.6620 | 1300.6510 | 0.0110  | 0 | 100 | 2.1e-008 | 1 | R.ALEEFANADLEVK.I               |
| 75 | 454.2398 | 1359.6976 | 1359.6929 | 0.0047  | 1 | 46  | 0.0051   | 1 | R.MSVEADINGLR.R.V               |
| 81 | 681.3607 | 1360.7068 | 1360.6834 | 0.0234  | 0 | 92  | 1.5e-007 | 1 | R.EVATNSLVQSGK.S                |
| 87 | 690.3665 | 1378.7184 | 1378.7204 | -0.0020 | 1 | 74  | 9.4e-006 | 1 | K.TRLEQEIATYR.R                 |
| 90 | 713.3462 | 1424.6778 | 1424.6896 | -0.0117 | 0 | 95  | 6.3e-008 | 1 | R.APSTYGGGLSVSSSR.F             |
| 91 | 478.5821 | 1432.7245 | 1432.7157 | 0.0087  | 1 | 78  | 3e-006   | 1 | K.ASLENSLEETKGR.Y               |
| 92 | 743.7980 | 1485.5814 | 1485.5864 | -0.0049 | 0 | 78  | 2.9e-006 | 1 | R.CEMEQNQEYK.I                  |

## N° in Table S1 N° spot protein identification

| 22 and 44                                                                                       |    | 970          |                 | K5 and K6F and Carnosinase 2 |                 |              |                      |                                                |               |             |                                 |
|-------------------------------------------------------------------------------------------------|----|--------------|-----------------|------------------------------|-----------------|--------------|----------------------|------------------------------------------------|---------------|-------------|---------------------------------|
| 22                                                                                              | 1. | O6PI71_HUMAN | Mass: 62568     | Score: 316                   | Coverage: 25%   |              | number of peptides : | 16                                             |               |             |                                 |
| Keratin 5.- Homo sapiens (Human).                                                               |    |              |                 |                              |                 |              |                      |                                                |               |             |                                 |
| Check to include this hit in error tolerant search or archive report                            |    |              |                 |                              |                 |              |                      |                                                |               |             |                                 |
|                                                                                                 |    | <b>Query</b> | <b>Observed</b> | <b>Mr(expt)</b>              | <b>Mr(calc)</b> | <b>Delta</b> | <b>Miss</b>          | <b>Score</b>                                   | <b>Expect</b> | <b>Rank</b> | <b>Peptide</b>                  |
|                                                                                                 |    | 3            | 414.2289        | 826.4432                     | 826.4225        | 0.0207       | 0                    | 35                                             | 0.071         | 1           | K.FASFDK.V                      |
|                                                                                                 |    | 7            | 442.7400        | 883.4654                     | 883.4400        | 0.0255       | 0                    | 44                                             | 0.0083        | 1           | R.TSFTSVSR.S                    |
|                                                                                                 |    | 14           | 473.2722        | 944.5298                     | 944.5039        | 0.0259       | 1                    | 49                                             | 0.0039        | 1           | R.GRLDSEL.R.N                   |
|                                                                                                 |    | 20           | 503.2518        | 1004.4890                    | 1004.4597       | 0.0294       | 0                    | 37                                             | 0.045         | 1           | K.LLEGEECRL                     |
|                                                                                                 |    | 22           | 508.2474        | 1014.4802                    | 1014.4552       | 0.0250       | 0                    | 40                                             | 0.027         | 1           | K.HEISEMNR.L.M                  |
|                                                                                                 |    | 24           | 508.7881        | 1015.5616                    | 1015.5298       | 0.0318       | 0                    | 41                                             | 0.022         | 1           | R.QLDSIVGER.G                   |
|                                                                                                 |    | 26           | 521.7456        | 1041.4766                    | 1041.4437       | 0.0330       | 0                    | 26                                             | 0.68          | 1           | K.DVDAAYMKN.V + Oxidation (M)   |
|                                                                                                 |    | 33           | 547.2844        | 1092.5542                    | 1092.5199       | 0.0343       | 0                    | 42                                             | 0.016         | 1           | K.AQYEEIANR.S                   |
|                                                                                                 |    | 35           | 547.8176        | 1093.6206                    | 1093.5880       | 0.0327       | 1                    | 42                                             | 0.012         | 1           | R.SLYNLGSGKR.I                  |
|                                                                                                 |    | 40           | 556.3075        | 1110.6004                    | 1110.5669       | 0.0335       | 0                    | 56                                             | 0.0006        | 1           | R.ISISTSGGFR.N                  |
|                                                                                                 |    | 43           | 572.3328        | 1142.6510                    | 1142.6183       | 0.0328       | 0                    | 69                                             | 2.7e-005      | 1           | K.LAELEALQK.A                   |
|                                                                                                 |    | 48           | 586.2881        | 1170.5616                    | 1170.5227       | 0.0390       | 0                    | 37                                             | 0.044         | 1           | R.EYQELMNTK.L + Oxidation (M)   |
|                                                                                                 |    | 52           | 597.8085        | 1193.6024                    | 1193.5676       | 0.0348       | 0                    | 56                                             | 0.00057       | 1           | K.YEELQQTAGR.H                  |
|                                                                                                 |    | 53           | 602.3398        | 1202.6650                    | 1202.6295       | 0.0355       | 0                    | 37                                             | 0.049         | 1           | K.WTLLQEQGTK.T                  |
|                                                                                                 |    | 56           | 627.8043        | 1253.5940                    | 1253.5598       | 0.0342       | 0                    | 69                                             | 2.9e-005      | 1           | R.NMQDLVEDFK.N + Oxidation (M)  |
|                                                                                                 |    | 63           | 713.8899        | 1425.7652                    | 1425.7173       | 0.0479       | 1                    | 37                                             | 0.037         | 1           | R.TTAENEVMLKK.D + Oxidation (M) |
| 22                                                                                              |    | K2C6F_HUMAN  | Mass: 60184     | Score: 105                   | Coverage: 10%   |              | number of peptides : | 7 with 2 specific for K6 in comparison with K5 |               |             |                                 |
| Keratin, type II cytoskeletal 6F (Cytokeratin 6F) (CK 6F) (K6F keratin).- Homo sapiens (Human). |    |              |                 |                              |                 |              |                      |                                                |               |             |                                 |
| Check to include this hit in error tolerant search or archive report                            |    |              |                 |                              |                 |              |                      |                                                |               |             |                                 |
|                                                                                                 |    | <b>Query</b> | <b>Observed</b> | <b>Mr(expt)</b>              | <b>Mr(calc)</b> | <b>Delta</b> | <b>Miss</b>          | <b>Score</b>                                   | <b>Expect</b> | <b>Rank</b> | <b>Peptide</b>                  |
|                                                                                                 |    | 3            | 414.2289        | 826.4432                     | 826.4225        | 0.0207       | 0                    | 35                                             | 0.071         | 1           | K.FASFDK.V                      |
|                                                                                                 |    | 14           | 473.2722        | 944.5298                     | 944.5039        | 0.0259       | 1                    | 49                                             | 0.0039        | 1           | R.GRLDSEL.R.N                   |
|                                                                                                 |    | 20           | 503.2518        | 1004.4890                    | 1004.4597       | 0.0294       | 0                    | 37                                             | 0.045         | 1           | K.LLEGEECRL                     |
|                                                                                                 |    | 26           | 521.7456        | 1041.4766                    | 1041.4437       | 0.0330       | 0                    | 26                                             | 0.68          | 1           | K.DVDAAYMKN.V + Oxidation (M)   |
|                                                                                                 |    | 38           | 554.2915        | 1106.5684                    | 1106.5356       | 0.0328       | 0                    | 47                                             | 0.0048        | 1           | K.AQYEEIAQR.S                   |
|                                                                                                 |    | 49           | 590.3232        | 1178.6318                    | 1178.5931       | 0.0387       | 0                    | 55                                             | 0.00081       | 1           | K.YEELQQTAGR.H                  |
|                                                                                                 |    | 53           | 602.3398        | 1202.6650                    | 1202.6295       | 0.0355       | 0                    | 37                                             | 0.049         | 1           | K.WTLLQEQGTK.T                  |
| 44                                                                                              |    | CAD56843     | Mass: 53187     | Score: 84                    | Coverage: 7%    |              | number of peptides : | 3                                              |               |             |                                 |
| Carnosinase 2.- Homo sapiens (Human).                                                           |    |              |                 |                              |                 |              |                      |                                                |               |             |                                 |
| Check to include this hit in error tolerant search or archive report                            |    |              |                 |                              |                 |              |                      |                                                |               |             |                                 |
|                                                                                                 |    | <b>Query</b> | <b>Observed</b> | <b>Mr(expt)</b>              | <b>Mr(calc)</b> | <b>Delta</b> | <b>Miss</b>          | <b>Score</b>                                   | <b>Expect</b> | <b>Rank</b> | <b>Peptide</b>                  |
|                                                                                                 |    | 27           | 526.7520        | 1051.4894                    | 1051.4570       | 0.0324       | 0                    | 29                                             | 0.25          | 1           | K.YIDENQDR.Y                    |
|                                                                                                 |    | 36           | 548.7706        | 1095.5266                    | 1095.4940       | 0.0326       | 0                    | 53                                             | 0.001         | 1           | R.MMEVAADVK.Q + 2 Oxidation (M) |
|                                                                                                 |    | 41           | 556.8236        | 1111.6326                    | 1111.5986       | 0.0341       | 0                    | 46                                             | 0.0054        | 1           | K.TGQEPVNVRL.F                  |

## N° in Table S1 N° spot protein identification

| 23 and 46                                                            |    | 882          |                 | K6A and D-3-phosphoglycerate dehydrogenase |                 |              |                      |              |               |             |                |
|----------------------------------------------------------------------|----|--------------|-----------------|--------------------------------------------|-----------------|--------------|----------------------|--------------|---------------|-------------|----------------|
| 23                                                                   | 1. | KRHUEA       | Mass: 60293     | Score: 1259                                | Coverage: 44%   |              | number of peptides : | 23           |               |             |                |
| keratin 6a, type II - human                                          |    |              |                 |                                            |                 |              |                      |              |               |             |                |
| Check to include this hit in error tolerant search or archive report |    |              |                 |                                            |                 |              |                      |              |               |             |                |
|                                                                      |    | <b>Query</b> | <b>Observed</b> | <b>Mr(expt)</b>                            | <b>Mr(calc)</b> | <b>Delta</b> | <b>Miss</b>          | <b>Score</b> | <b>Expect</b> | <b>Rank</b> | <b>Peptide</b> |
|                                                                      |    | 1            | 414.2136        | 826.4126                                   | 826.4225        | -0.0099      | 0                    | 36           | 0.054         | 1           | K.FASFDK.V     |

Table S2A

|           |          |           |           |         |   |     |          |   |                                  |
|-----------|----------|-----------|-----------|---------|---|-----|----------|---|----------------------------------|
| <u>5</u>  | 453.7297 | 905.4448  | 905.4607  | -0.0158 | 0 | 28  | 0.45     | 1 | R.FLEQQNK.V                      |
| <u>10</u> | 473.2498 | 944.4850  | 944.5039  | -0.0189 | 1 | 44  | 0.012    | 1 | R.GRLDSEL.R.G                    |
| <u>11</u> | 483.2448 | 964.4750  | 964.4839  | -0.0088 | 1 | 51  | 0.0025   | 1 | R.RGFSANSAR.L                    |
| <u>12</u> | 486.7536 | 971.4926  | 971.5036  | -0.0109 | 0 | 65  | 8.5e-005 | 1 | K.QEIAENR.M                      |
| <u>15</u> | 503.2326 | 1004.4506 | 1004.4597 | -0.0090 | 0 | 41  | 0.021    | 1 | K.LLEGEECR.L                     |
| <u>17</u> | 506.7518 | 1011.4890 | 1011.4985 | -0.0095 | 0 | 84  | 8.7e-007 | 1 | R.SGFSSVSYSR.S                   |
| 19        | 508.7670 | 1015.5194 | 1015.5298 | -0.0104 | 0 | 41  | 0.021    | 1 | R.QLDSIVGER.G                    |
| <u>26</u> | 533.7540 | 1065.4934 | 1065.5090 | -0.0156 | 1 | 46  | 0.0054   | 1 | K.YEDEINKR.T                     |
| <u>30</u> | 554.2653 | 1106.5160 | 1106.5356 | -0.0196 | 0 | 42  | 0.015    | 1 | K.AQYEEIAQR.S                    |
| 31        | 567.2774 | 1132.5402 | 1132.5546 | -0.0144 | 1 | 53  | 0.0012   | 1 | R.KLLEGEECR.L                    |
| <u>33</u> | 577.2772 | 1152.5398 | 1152.5485 | -0.0086 | 0 | 55  | 0.00069  | 1 | K.EYQELMNVK.L                    |
| <u>36</u> | 583.2896 | 1164.5646 | 1164.5775 | -0.0128 | 0 | 72  | 1.6e-005 | 1 | K.YEELQVYTAGR.H                  |
| 45        | 585.7710 | 1169.5274 | 1169.5387 | -0.0112 | 1 | 46  | 0.0053   | 1 | K.KDVAAYMNVK.V + Oxidation (M)   |
| 47        | 599.2723 | 1196.5300 | 1196.5383 | -0.0083 | 0 | 64  | 8.6e-005 | 1 | R.GMODLVDFK.N + Oxidation (M)    |
| <u>51</u> | 602.3169 | 1202.6192 | 1202.6295 | -0.0103 | 0 | 49  | 0.0031   | 1 | K.WTLLQEQGTK.T                   |
| <u>53</u> | 611.8150 | 1221.6154 | 1221.6241 | -0.0087 | 0 | 78  | 3e-006   | 1 | R.TAAENEFVTLK.K                  |
| 63        | 675.8615 | 1349.7084 | 1349.7191 | -0.0106 | 1 | 116 | 6.4e-010 | 1 | R.TAAENEFVTLK.K.D                |
| <u>66</u> | 679.3645 | 1356.7144 | 1356.7249 | -0.0104 | 1 | 113 | 1.2e-009 | 1 | K.NKLEGEDALQK.A                  |
| <u>68</u> | 712.7966 | 1423.5786 | 1423.6263 | -0.0476 | 0 | 134 | 7.9e-012 | 1 | R.GSGGLGGACGGAGFSR.S             |
| 70        | 720.3424 | 1438.6702 | 1438.6762 | -0.0060 | 1 | 76  | 4e-006   | 1 | R.GMODLVDFK.NK.Y + Oxidation (M) |
| <u>71</u> | 724.3814 | 1446.7482 | 1446.7678 | -0.0196 | 0 | 114 | 7.6e-010 | 1 | R.AIGGLSSVGGGSSTIK.Y             |
| <u>74</u> | 508.6021 | 1522.7845 | 1522.8065 | -0.0220 | 1 | 32  | 0.11     | 1 | R.LLKEYQELMNVK.L + Oxidation (M) |

46

SERA\_HUMAN Mass: 57225 Score: 269 Coverage: 12%

D-3-phosphoglycerate dehydrogenase (EC 1.1.1.95) (3-PGDH),- Homo sapiens (Human).

number of peptides :

6

Check to include this hit in error tolerant search or archive report

| Query                               | Observed  | Mr(expt) | Mr(calc)  | Delta     | Miss    | Score | Expect | Rank     | Peptide |                               |
|-------------------------------------|-----------|----------|-----------|-----------|---------|-------|--------|----------|---------|-------------------------------|
| <input checked="" type="checkbox"/> | <u>3</u>  | 450.2813 | 898.5480  | 898.5600  | -0.0120 | 0     | 38     | 0.035    | 1       | K.TLGLGLGR.I                  |
| <input checked="" type="checkbox"/> | 16        | 506.7376 | 1011.4606 | 1011.4695 | -0.0089 | 0     | 35     | 0.067    | 1       | K.FMGTELNGK.T + Oxidation (M) |
| <input checked="" type="checkbox"/> | <u>27</u> | 536.2872 | 1070.5598 | 1070.5720 | -0.0122 | 0     | 88     | 4e-007   | 1       | K.QADVNLVNAK.L                |
| <input checked="" type="checkbox"/> | <u>28</u> | 550.3054 | 1098.5962 | 1098.6033 | -0.0071 | 0     | 58     | 0.00032  | 1       | R.GGIVDEGALLR.A               |
| <input checked="" type="checkbox"/> | 61        | 673.3832 | 1344.7518 | 1344.7613 | -0.0094 | 0     | 70     | 2.1e-005 | 1       | K.GTIQVITQGTSLK.N             |
| <input checked="" type="checkbox"/> | <u>73</u> | 744.8636 | 1487.7126 | 1487.7216 | -0.0090 | 0     | 127    | 3.7e-011 | 1       | R.AGTGVDNDVLEAATR.K           |

N° in Table S1 N° spot protein identification

24 870 K6A

1. KRHUEA Mass: 60293 Score: 662 Coverage: 34%

keratin 6a, type II - human

number of peptides :

19

Check to include this hit in error tolerant search or archive report

| Query                               | Observed  | Mr(expt) | Mr(calc)  | Delta     | Miss   | Score | Expect | Rank     | Peptide |                                |
|-------------------------------------|-----------|----------|-----------|-----------|--------|-------|--------|----------|---------|--------------------------------|
| <input checked="" type="checkbox"/> | <u>2</u>  | 414.2411 | 826.4676  | 826.4225  | 0.0451 | 0     | 38     | 0.039    | 1       | K.FASFDIK.V                    |
| <input checked="" type="checkbox"/> | <u>12</u> | 473.2849 | 944.5552  | 944.5039  | 0.0513 | 1     | 42     | 0.019    | 1       | R.GRLDSEL.R.G                  |
| <input checked="" type="checkbox"/> | <u>17</u> | 486.7865 | 971.5584  | 971.5036  | 0.0549 | 0     | 51     | 0.0021   | 1       | K.QEIAENR.M                    |
| <input checked="" type="checkbox"/> | <u>18</u> | 503.2638 | 1004.5130 | 1004.4597 | 0.0534 | 0     | 39     | 0.03     | 1       | K.LLEGEECR.L                   |
| <input checked="" type="checkbox"/> | 21        | 506.7849 | 1011.5552 | 1011.4985 | 0.0567 | 0     | 95     | 6.3e-008 | 1       | R.SGFSSVSYSR.S                 |
| <input checked="" type="checkbox"/> | <u>23</u> | 508.8010 | 1015.5874 | 1015.5298 | 0.0576 | 0     | 50     | 0.003    | 1       | R.QLDSIVGER.G                  |
| <input checked="" type="checkbox"/> | <u>28</u> | 521.7582 | 1041.5018 | 1041.4437 | 0.0582 | 0     | 35     | 0.075    | 1       | K.DVDAAYMNVK.V + Oxidation (M) |
| <input checked="" type="checkbox"/> | 30        | 533.7916 | 1065.5686 | 1065.5090 | 0.0596 | 1     | 46     | 0.0055   | 1       | K.YEDEINKR.T                   |
| <input checked="" type="checkbox"/> | 31        | 541.8350 | 1081.6554 | 1081.5920 | 0.0634 | 1     | 28     | 0.31     | 1       | K.FASFDIKV.R.F                 |
| <input checked="" type="checkbox"/> | <u>38</u> | 567.3174 | 1132.6202 | 1132.5546 | 0.0656 | 1     | 48     | 0.0039   | 1       | R.KLLEGEECR.L                  |
| <input checked="" type="checkbox"/> | <u>39</u> | 577.3153 | 1152.6160 | 1152.5485 | 0.0676 | 0     | 42     | 0.015    | 1       | K.EYQELMNVK.L                  |
| <input checked="" type="checkbox"/> | 42        | 583.3296 | 1164.6446 | 1164.5775 | 0.0672 | 0     | 58     | 0.00035  | 1       | K.YEELQVYTAGR.H                |
| <input checked="" type="checkbox"/> | <u>48</u> | 599.3125 | 1196.6104 | 1196.5383 | 0.0721 | 0     | 56     | 0.0005   | 1       | R.GMODLVDFK.N + Oxidation (M)  |
| <input checked="" type="checkbox"/> | <u>51</u> | 602.3565 | 1202.6984 | 1202.6295 | 0.0689 | 0     | 54     | 0.00088  | 1       | K.WTLLQEQGTK.T                 |
| <input checked="" type="checkbox"/> | 53        | 611.8542 | 1221.6938 | 1221.6241 | 0.0697 | 0     | 87     | 3.9e-007 | 1       | R.TAAENEFVTLK.K                |
| <input checked="" type="checkbox"/> | <u>59</u> | 450.9363 | 1349.7871 | 1349.7191 | 0.0680 | 1     | 72     | 1.7e-005 | 1       | R.TAAENEFVTLK.K.D              |
| <input checked="" type="checkbox"/> | <u>61</u> | 679.4083 | 1356.8020 | 1356.7249 | 0.0772 | 1     | 33     | 0.1      | 1       | K.NKLEGEDALQK.A                |
| <input checked="" type="checkbox"/> | <u>63</u> | 712.8631 | 1423.7116 | 1423.6263 | 0.0854 | 0     | 108    | 2.7e-009 | 1       | R.GSGGLGGACGGAGFSR.S           |
| <input checked="" type="checkbox"/> | 64        | 724.4338 | 1446.8530 | 1446.7678 | 0.0852 | 0     | 102    | 1.3e-008 | 1       | R.AIGGLSSVGGGSSTIK.Y           |

N° in Table S1 N° spot protein identification

25 862 K6A

1. Q96CL4 HUMAN Mass: 60266 Score: 427 Coverage: 29%

number of peptides :

15

Table S2A

Keratin 6A.- Homo sapiens (Human).

Check to include this hit in error tolerant search or archive report

| Query     | Observed | Mr(expt)  | Mr(calc)  | Delta  | Miss | Score | Expect   | Rank | Peptide                       |
|-----------|----------|-----------|-----------|--------|------|-------|----------|------|-------------------------------|
| <u>8</u>  | 453.7573 | 905.5000  | 905.4607  | 0.0394 | 0    | 28    | 0.44     | 1    | R.FLEQQNK.V                   |
| <u>9</u>  | 473.2813 | 944.5480  | 944.5039  | 0.0441 | 1    | 44    | 0.012    | 1    | R.GRLDSEL.R.G                 |
| <u>12</u> | 486.7813 | 971.5480  | 971.5036  | 0.0445 | 0    | 46    | 0.0063   | 1    | K.QEIAEIN.R.M                 |
| <u>14</u> | 503.2612 | 1004.5078 | 1004.4597 | 0.0482 | 0    | 37    | 0.048    | 1    | K.LLEGEEC.R.L                 |
| <u>15</u> | 506.7801 | 1011.5456 | 1011.4985 | 0.0471 | 0    | 80    | 2.1e-006 | 1    | R.SGFSSVSVSR.S                |
| <u>16</u> | 508.7969 | 1015.5792 | 1015.5298 | 0.0494 | 0    | 49    | 0.0035   | 1    | R.QLDSIVGER.G                 |
| <u>18</u> | 521.7522 | 1041.4898 | 1041.4437 | 0.0462 | 0    | 30    | 0.24     | 1    | K.DVDAAYMKN.V + Oxidation (M) |
| <u>21</u> | 554.2993 | 1106.5840 | 1106.5356 | 0.0484 | 0    | 34    | 0.087    | 1    | K.AQYEEIAQR.S                 |
| <u>25</u> | 583.3248 | 1164.6350 | 1164.5775 | 0.0576 | 0    | 50    | 0.0021   | 1    | K.YEELQVTAGR.H                |
| <u>26</u> | 585.3054 | 1168.5962 | 1168.5434 | 0.0529 | 0    | 34    | 0.085    | 1    | K.EYQELMNVK.L + Oxidation (M) |
| <u>29</u> | 591.3089 | 1180.6032 | 1180.5434 | 0.0598 | 0    | 46    | 0.005    | 1    | R.GMQDLVEDFK.N                |
| <u>33</u> | 602.3510 | 1202.6874 | 1202.6295 | 0.0579 | 0    | 44    | 0.01     | 1    | K.WTLLQEQGK.T                 |
| <u>38</u> | 712.8575 | 1423.7004 | 1423.6263 | 0.0742 | 0    | 81    | 1.5e-006 | 1    | R.GSGGLGGACGGAGFSR.S          |
| <u>40</u> | 724.4305 | 1446.8464 | 1446.7678 | 0.0786 | 0    | 70    | 2.2e-005 | 1    | R.AIGGLSSVGGGSSTIK.Y          |
| <u>42</u> | 799.9243 | 1597.8340 | 1597.7519 | 0.0822 | 0    | 121   | 1.5e-010 | 1    | R.ISIGGSCAISGGYGSRA           |

## N° in Table S1 N° spot protein identification

|           |     |                                                                      |                 |                 |                 |                      |             |              |               |             |                                |
|-----------|-----|----------------------------------------------------------------------|-----------------|-----------------|-----------------|----------------------|-------------|--------------|---------------|-------------|--------------------------------|
| 26 and 47 | 871 | K6A and D-3-phosphoglycerate dehydrogenase<br>Q96CL4_HUMAN           | Mass: 60266     | Score: 602      | Coverage: 32%   | number of peptides : | 19          |              |               |             |                                |
| 26        |     | Keratin 6A.- Homo sapiens (Human).                                   |                 |                 |                 |                      |             |              |               |             |                                |
|           |     | Check to include this hit in error tolerant search or archive report |                 |                 |                 |                      |             |              |               |             |                                |
|           |     | <b>Query</b>                                                         | <b>Observed</b> | <b>Mr(expt)</b> | <b>Mr(calc)</b> | <b>Delta</b>         | <b>Miss</b> | <b>Score</b> | <b>Expect</b> | <b>Rank</b> | <b>Peptide</b>                 |
|           |     | <u>2</u>                                                             | 414.2170        | 826.4194        | 826.4225        | -0.0031              | 0           | 38           | 0.034         | 1           | R.FASFIDK.V                    |
|           |     | <u>13</u>                                                            | 473.2594        | 944.5042        | 944.5039        | 0.0003               | 1           | 37           | 0.059         | 1           | R.GRLDSEL.R.G                  |
|           |     | <u>16</u>                                                            | 486.7575        | 971.5004        | 971.5036        | -0.0031              | 0           | 43           | 0.012         | 1           | K.QEIAEIN.R.M                  |
|           |     | <u>19</u>                                                            | 503.2367        | 1004.4588       | 1004.4597       | -0.0008              | 0           | 54           | 0.00093       | 1           | K.LLEGEEC.R.L                  |
|           |     | <u>21</u>                                                            | 506.7544        | 1011.4942       | 1011.4985       | -0.0043              | 0           | 77           | 4.5e-006      | 1           | R.SGFSSVSVSR.S                 |
|           |     | <u>23</u>                                                            | 508.7714        | 1015.5282       | 1015.5298       | -0.0016              | 0           | 38           | 0.043         | 1           | R.QLDSIVGER.G                  |
|           |     | <u>26</u>                                                            | 521.7274        | 1041.4402       | 1041.4437       | -0.0034              | 0           | 33           | 0.12          | 1           | K.DVDAAYMKN.V + Oxidation (M)  |
|           |     | <u>29</u>                                                            | 533.7592        | 1065.5038       | 1065.5090       | -0.0052              | 1           | 46           | 0.0057        | 1           | K.YEDEINKR.T                   |
|           |     | <u>35</u>                                                            | 554.2739        | 1106.5332       | 1106.5356       | -0.0024              | 0           | 48           | 0.004         | 1           | K.AQYEEIAQR.S                  |
|           |     | <u>44</u>                                                            | 583.2949        | 1164.5752       | 1164.5775       | -0.0022              | 0           | 58           | 0.00036       | 1           | K.YEELQVTAGR.H                 |
|           |     | <u>46</u>                                                            | 585.2784        | 1168.5422       | 1168.5434       | -0.0011              | 0           | 41           | 0.02          | 1           | K.EYQELMNVK.L + Oxidation (M)  |
|           |     | <u>48</u>                                                            | 599.2766        | 1196.5386       | 1196.5383       | 0.0003               | 0           | 66           | 5e-005        | 1           | R.GMQDLVEDFK.N + Oxidation (M) |
|           |     | <u>50</u>                                                            | 602.3235        | 1202.6324       | 1202.6295       | 0.0029               | 0           | 49           | 0.0028        | 1           | K.WTLLQEQGK.T                  |
|           |     | <u>51</u>                                                            | 611.8188        | 1221.6230       | 1221.6241       | -0.0011              | 0           | 87           | 4e-007        | 1           | R.TAANEFVTLK.K                 |
|           |     | <u>58</u>                                                            | 658.3523        | 1314.6900       | 1314.6891       | 0.0009               | 1           | 84           | 8.8e-007      | 1           | R.NTKQEIAEIN.R.M               |
|           |     | <u>62</u>                                                            | 450.9080        | 1349.7022       | 1349.7191       | -0.0169              | 1           | 69           | 3.9e-005      | 1           | R.TAANEFVTLK.K.D               |
|           |     | <u>63</u>                                                            | 679.3706        | 1356.7266       | 1356.7249       | 0.0018               | 1           | 33           | 0.11          | 1           | K.NKLEGEDALQK.A                |
|           |     | <u>64</u>                                                            | 712.8226        | 1423.6306       | 1423.6263       | 0.0044               | 0           | 88           | 2.9e-007      | 1           | R.GSGGLGGACGGAGFSR.S           |
|           |     | <u>67</u>                                                            | 724.3908        | 1446.7670       | 1446.7678       | -0.0008              | 0           | 95           | 6.3e-008      | 1           | R.AIGGLSSVGGGSSTIK.Y           |

SERA\_HUMAN\_Mass: 57225 Score: 188 Coverage: 14%

D-3-phosphoglycerate dehydrogenase (EC 1.1.1.95) (3-PGDH).- Homo sapiens (Human).

Check to include this hit in error tolerant search or archive report

|    |  |              |                 |                 |                 |              |             |              |               |             |                                |
|----|--|--------------|-----------------|-----------------|-----------------|--------------|-------------|--------------|---------------|-------------|--------------------------------|
| 47 |  | <b>Query</b> | <b>Observed</b> | <b>Mr(expt)</b> | <b>Mr(calc)</b> | <b>Delta</b> | <b>Miss</b> | <b>Score</b> | <b>Expect</b> | <b>Rank</b> | <b>Peptide</b>                 |
|    |  | <u>31</u>    | 536.2927        | 1070.5708       | 1070.5720       | -0.0012      | 0           | 83           | 1.4e-006      | 1           | K.QADVNLVNAK.L                 |
|    |  | <u>32</u>    | 545.7814        | 1089.5482       | 1089.5488       | -0.0006      | 0           | 25           | 0.77          | 1           | R.QIPQATASMK.D + Oxidation (M) |
|    |  | <u>33</u>    | 550.3076        | 1098.6006       | 1098.6033       | -0.0027      | 0           | 26           | 0.57          | 1           | R.GGIVDEGALLR.A                |
|    |  | <u>39</u>    | 565.8051        | 1129.5956       | 1129.5979       | -0.0022      | 0           | 54           | 0.00099       | 1           | K.VTADVINA AEK.L               |
|    |  | <u>55</u>    | 649.8688        | 1297.7230       | 1297.7242       | -0.0011      | 0           | 102          | 1.1e-008      | 1           | K.IIQDGLQVVEK.Q                |
|    |  | <u>61</u>    | 673.3870        | 1344.7594       | 1344.7613       | -0.0018      | 0           | 33           | 0.12          | 1           | K.GTIQVITQGTSLK.N              |

## N° in Table S1 N° spot protein identification

|    |      |                                                                                                      |                 |                 |                 |                      |             |              |               |             |                 |
|----|------|------------------------------------------------------------------------------------------------------|-----------------|-----------------|-----------------|----------------------|-------------|--------------|---------------|-------------|-----------------|
| 27 | 1525 | Stathmin                                                                                             |                 |                 |                 |                      |             |              |               |             |                 |
| 1. |      | STMN1_HUMAN                                                                                          | Mass: 17161     | Score: 79       | Coverage: 20%   | number of peptides : | 3           |              |               |             |                 |
|    |      | Stathmin (Phosphoprotein p19) (pp19) (Oncoprotein 18) (Op18) (Leukemia-associated phosphoprotein p1) |                 |                 |                 |                      |             |              |               |             |                 |
|    |      | Check to include this hit in error tolerant search or archive report                                 |                 |                 |                 |                      |             |              |               |             |                 |
|    |      | <b>Query</b>                                                                                         | <b>Observed</b> | <b>Mr(expt)</b> | <b>Mr(calc)</b> | <b>Delta</b>         | <b>Miss</b> | <b>Score</b> | <b>Expect</b> | <b>Rank</b> | <b>Peptide</b>  |
|    |      | <u>8</u>                                                                                             | 537.8100        | 1073.6054       | 1073.5604       | 0.0450               | 0           | 38           | 0.043         | 1           | K.DLSLEIQK.K    |
|    |      | <u>10</u>                                                                                            | 583.2971        | 1164.5796       | 1164.5411       | 0.0386               | 0           | 59           | 0.00028       | 1           | K.AIEENNFSK.M   |
|    |      | <u>13</u>                                                                                            | 653.7860        | 1305.5574       | 1305.5208       | 0.0366               | 1           | 44           | 0.0084        | 1           | K.ESKDPADTEAD.- |

Table S2A

| N° in Table S1                                |                                                                                                     | N° spot                        |            | protein identification |                      |      |       |          |      |                                  |  |
|-----------------------------------------------|-----------------------------------------------------------------------------------------------------|--------------------------------|------------|------------------------|----------------------|------|-------|----------|------|----------------------------------|--|
| 28                                            | 292                                                                                                 | dynactin 1                     |            |                        |                      |      |       |          |      |                                  |  |
| 1.                                            | AAD03694                                                                                            | Mass: 140419                   | Score: 343 | Coverage: 9%           | number of peptides : |      | 12    |          |      |                                  |  |
|                                               | HSDCTN22 NID: - Homo sapiens                                                                        |                                |            |                        |                      |      |       |          |      |                                  |  |
|                                               | Check to include this hit in error tolerant search or archive report                                |                                |            |                        |                      |      |       |          |      |                                  |  |
|                                               | Query                                                                                               | Observed                       | Mr(expt)   | Mr(calc)               | Delta                | Miss | Score | Expect   | Rank | Peptide                          |  |
|                                               | 5                                                                                                   | 445.2356                       | 888.4566   | 888.4552               | 0.0014               | 0    | 37    | 0.068    | 1    | R.ETELER.E                       |  |
|                                               | 6                                                                                                   | 493.7660                       | 985.5174   | 985.5192               | -0.0018              | 0    | 47    | 0.0052   | 1    | K.NQELEVVR.Q                     |  |
|                                               | 8                                                                                                   | 503.7332                       | 1005.4518  | 1005.4549              | -0.0031              | 0    | 38    | 0.043    | 1    | R.EQLDMAGAR.V + Oxidation (M)    |  |
|                                               | 9                                                                                                   | 536.8028                       | 1071.5910  | 1071.5924              | -0.0013              | 0    | 63    | 0.00014  | 1    | R.LEETQALLR.K                    |  |
|                                               | 11                                                                                                  | 592.2841                       | 1182.5536  | 1182.5517              | 0.0020               | 0    | 90    | 1.8e-007 | 1    | K.GSDGAASSYQLK.Q                 |  |
|                                               | 13                                                                                                  | 598.2677                       | 1194.5208  | 1194.5187              | 0.0022               | 0    | 46    | 0.0055   | 1    | R.DLETSCDIR.Q                    |  |
|                                               | 16                                                                                                  | 608.8252                       | 1215.6358  | 1215.6347              | 0.0012               | 0    | 56    | 0.00063  | 1    | R.AEITDAEGLGLK.L                 |  |
|                                               | 17                                                                                                  | 631.7936                       | 1261.5726  | 1261.5721              | 0.0006               | 0    | 68    | 3.9e-005 | 1    | K.MQEQQADLQR.R + Oxidation (M)   |  |
|                                               | 18                                                                                                  | 432.2310                       | 1293.6712  | 1293.6789              | -0.0078              | 0    | 47    | 0.0042   | 1    | R.QLTAHLQDVNRE                   |  |
|                                               | 20                                                                                                  | 448.9045                       | 1343.6917  | 1343.7045              | -0.0128              | 1    | 23    | 0.92     | 1    | K.IKGEELSEANVRL                  |  |
|                                               | 22                                                                                                  | 702.3417                       | 1402.6688  | 1402.6688              | 0.0000               | 0    | 92    | 1.1e-007 | 1    | R.ELTNQEQASVER.Q                 |  |
|                                               | 23                                                                                                  | 712.8510                       | 1423.6874  | 1423.6799              | 0.0075               | 0    | 72    | 1.2e-005 | 1    | R.QSCNIIUSTMKN.L + Oxidation (M) |  |
| N° in Table S1 N° spot protein identification |                                                                                                     |                                |            |                        |                      |      |       |          |      |                                  |  |
| 29                                            | 418                                                                                                 | Coronin-7                      |            |                        |                      |      |       |          |      |                                  |  |
|                                               | BAB15211                                                                                            | Mass: 101596                   | Score: 56  | Coverage: 1%           | number of peptides : |      | 1     |          |      |                                  |  |
|                                               | AK025674 NID: - Homo sapiens (Coronin-7)                                                            |                                |            |                        |                      |      |       |          |      |                                  |  |
|                                               | Check to include this hit in error tolerant search or archive report                                |                                |            |                        |                      |      |       |          |      |                                  |  |
|                                               | Query                                                                                               | Observed                       | Mr(expt)   | Mr(calc)               | Delta                | Miss | Score | Expect   | Rank | Peptide                          |  |
|                                               | 5                                                                                                   | 646.8463                       | 1291.6780  | 1291.6408              | 0.0372               | 0    | 56    | 0.00057  | 1    | R.SGPEPLQEGPGPK.G                |  |
| N° in Table S1 N° spot protein identification |                                                                                                     |                                |            |                        |                      |      |       |          |      |                                  |  |
| 30                                            | 1302                                                                                                | Hsp-27 Phospho S82             |            |                        |                      |      |       |          |      |                                  |  |
| 1.                                            | HHHU27                                                                                              | Mass: 22826                    | Score: 375 | Coverage: 24%          | number of peptides : |      | 6     |          |      |                                  |  |
|                                               | heat shock protein 27 - human                                                                       |                                |            |                        |                      |      |       |          |      |                                  |  |
|                                               | Check to include this hit in error tolerant search or archive report                                |                                |            |                        |                      |      |       |          |      |                                  |  |
|                                               | Query                                                                                               | Observed                       | Mr(expt)   | Mr(calc)               | Delta                | Miss | Score | Expect   | Rank | Peptide                          |  |
|                                               | 9                                                                                                   | 471.3003                       | 940.5860   | 940.4978               | 0.0883               | 0    | 33    | 0.23     | 1    | R.AQLGGPEAAK.S                   |  |
|                                               | 20                                                                                                  | 552.8088                       | 1103.6030  | 1103.4996              | 0.1035               | 0    | 61    | 0.00034  | 1    | R.QDEHGYISR.C                    |  |
|                                               | 22                                                                                                  | 573.8721                       | 1145.7296  | 1145.6292              | 0.1004               | 1    | 65    | 0.00013  | 1    | K.TKDGVEITGKH                    |  |
|                                               | 23                                                                                                  | 578.3216                       | 1154.6286  | 1154.5332              | 0.0954               | 0    | 71    | 4e-005   | 1    | R.QLSSGVSEIR.H + Phospho (ST)    |  |
|                                               | 33                                                                                                  | 490.2900                       | 1467.8482  | 1467.7318              | 0.1164               | 1    | 70    | 4.4e-005 | 1    | K.DGVVEITGKHEER.Q                |  |
|                                               | 34                                                                                                  | 548.6583                       | 1642.9531  | 1642.8162              | 0.1369               | 1    | 116   | 9.7e-010 | 1    | R.AQLGGPEAAKSDETAAK.-            |  |
| N° in Table S1 N° spot protein identification |                                                                                                     |                                |            |                        |                      |      |       |          |      |                                  |  |
| 31                                            | 239                                                                                                 | Osmotic stress protein 94      |            |                        |                      |      |       |          |      |                                  |  |
| 1.                                            | HS74L_HUMAN                                                                                         | Mass: 95453                    | Score: 593 | Coverage: 14%          | number of peptides : |      | 11    |          |      |                                  |  |
|                                               | Heat shock 70 kDa protein 4L (Osmotic stress protein 94) (Heat shock 70-related protein APG-1).- Ho |                                |            |                        |                      |      |       |          |      |                                  |  |
|                                               | Check to include this hit in error tolerant search or archive report                                |                                |            |                        |                      |      |       |          |      |                                  |  |
|                                               | Query                                                                                               | Observed                       | Mr(expt)   | Mr(calc)               | Delta                | Miss | Score | Expect   | Rank | Peptide                          |  |
|                                               | 1                                                                                                   | 405.2249                       | 808.4352   | 808.4331               | 0.0022               | 0    | 25    | 0.69     | 1    | R.LGTVYEFK.F                     |  |
|                                               | 5                                                                                                   | 449.2319                       | 896.4492   | 896.4504               | -0.0012              | 0    | 36    | 0.048    | 1    | K.NHPAPFSK.V                     |  |
|                                               | 6                                                                                                   | 458.7638                       | 915.5130   | 915.5138               | -0.0007              | 0    | 46    | 0.0065   | 1    | K.SQIVTNVRL.N                    |  |
|                                               | 12                                                                                                  | 506.7690                       | 1011.5234  | 1011.5237              | -0.0002              | 0    | 45    | 0.0067   | 1    | K.AEVPEDKPK.A                    |  |
|                                               | 13                                                                                                  | 525.2799                       | 1048.5452  | 1048.5441              | 0.0012               | 0    | 49    | 0.003    | 1    | K.FITPEDLSK.L                    |  |
|                                               | 15                                                                                                  | 550.3216                       | 1098.6286  | 1098.6285              | 0.0002               | 0    | 68    | 3.7e-005 | 1    | K.LSLTQDPVVK.V                   |  |
|                                               | 17                                                                                                  | 566.8144                       | 1131.6142  | 1131.6135              | 0.0007               | 1    | 46    | 0.0063   | 1    | K.LKETSINALK.K                   |  |
|                                               | 20                                                                                                  | 588.2949                       | 1174.5752  | 1174.5764              | -0.0012              | 0    | 57    | 0.00046  | 1    | K.AVMEQANLQRE + Oxidation (M)    |  |
|                                               | 22                                                                                                  | 611.2888                       | 1220.5630  | 1220.5642              | -0.0011              | 0    | 36    | 0.065    | 1    | R.CTPACISLGSR.T                  |  |
|                                               | 24                                                                                                  | 653.8178                       | 1305.6210  | 1305.6201              | 0.0009               | 0    | 45    | 0.0056   | 1    | R.SFDDPIVQTER.I                  |  |
|                                               | 25                                                                                                  | 738.3699                       | 1474.7252  | 1474.7263              | -0.0011              | 0    | 85    | 6e-007   | 1    | K.DISTTLNADEAVAR.G               |  |
| N° in Table S1 N° spot protein identification |                                                                                                     |                                |            |                        |                      |      |       |          |      |                                  |  |
| 32                                            | 1319                                                                                                | Glutathione S-transferase Mu 3 |            |                        |                      |      |       |          |      |                                  |  |
| 1.                                            | GSTM3_HUMAN                                                                                         | Mass: 26867                    | Score: 184 | Coverage: 22%          | number of peptides : |      | 6     |          |      |                                  |  |
|                                               | Glutathione S-transferase Mu 3 (EC 2.5.1.18) (GSTM3-3) (GST class-mu 3) (hGSTM3-3).- Homo sapiens ( |                                |            |                        |                      |      |       |          |      |                                  |  |
|                                               | Check to include this hit in error tolerant search or archive report                                |                                |            |                        |                      |      |       |          |      |                                  |  |
|                                               | Query                                                                                               | Observed                       | Mr(expt)   | Mr(calc)               | Delta                | Miss | Score | Expect   | Rank | Peptide                          |  |
|                                               | 6                                                                                                   | 508.3033                       | 1014.5920  | 1014.5822              | 0.0099               | 0    | 67    | 4.7e-005 | 1    | K.ITQSNAILR.Y                    |  |
|                                               | 8                                                                                                   | 568.2872                       | 1134.5598  | 1134.5379              | 0.0219               | 0    | 43    | 0.013    | 1    | K.CLDEFPNLK.A                    |  |
|                                               | 9                                                                                                   | 569.7542                       | 1137.4938  | 1137.4761              | 0.0178               | 0    | 31    | 0.17     | 1    | R.LCYSSDHEK.L                    |  |
|                                               | 13                                                                                                  | 610.7866                       | 1219.5586  | 1219.5478              | 0.0109               | 0    | 48    | 0.0037   | 1    | K.MAQWGNKPKIC.- + Oxidation (M)  |  |

Table S2A

|           |          |           |           |        |   |    |         |   |                 |
|-----------|----------|-----------|-----------|--------|---|----|---------|---|-----------------|
| <u>14</u> | 629.3758 | 1256.7370 | 1256.7200 | 0.0170 | 1 | 38 | 0.038   | 1 | K.NKITQSNAILR.Y |
| <u>16</u> | 673.7784 | 1345.5422 | 1345.5245 | 0.0178 | 0 | 59 | 0.00029 | 1 | R.YTCGEAPDYDR.S |

---

**N° in Table S1 N° spot protein identification**


---

|    |                                                                      |                     |                 |                 |              |                      |              |               |             |                |
|----|----------------------------------------------------------------------|---------------------|-----------------|-----------------|--------------|----------------------|--------------|---------------|-------------|----------------|
| 33 | 699                                                                  | HSP70               |                 |                 |              |                      |              |               |             |                |
| 1. | AA221815                                                             | Mass: 70267         | Score: 159      | Coverage: 7%    |              | number of peptides : |              | 6             |             |                |
|    | AF134726                                                             | NID: - Homo sapiens |                 |                 |              |                      |              |               |             |                |
|    | Check to include this hit in error tolerant search or archive report |                     |                 |                 |              |                      |              |               |             |                |
|    | <b>Query</b>                                                         | <b>Observed</b>     | <b>Mr(expt)</b> | <b>Mr(calc)</b> | <b>Delta</b> | <b>Miss</b>          | <b>Score</b> | <b>Expect</b> | <b>Rank</b> | <b>Peptide</b> |
|    | <u>1</u>                                                             | 402.7232            | 803.4318        | 803.4389        | -0.0070      | 0                    | 41           | 0.024         | 1           | K.IITITNDK.G   |
|    | <u>3</u>                                                             | 502.2713            | 1002.5280       | 1002.5345       | -0.0065      | 1                    | 63           | 0.00013       | 1           | R.LSKEEIER.M   |
|    | <u>4</u>                                                             | 509.2865            | 1016.5584       | 1016.5614       | -0.0030      | 1                    | 50           | 0.0029        | 1           | K.IITITNDKGR.L |
|    | <u>5</u>                                                             | 566.7945            | 1131.5744       | 1131.5771       | -0.0027      | 1                    | 62           | 0.00014       | 1           | K.SAVEDEGLKGI  |
|    | <u>6</u>                                                             | 569.2785            | 1136.5424       | 1136.5462       | -0.0037      | 1                    | 54           | 0.00088       | 1           | K.YKAEDVQRE    |
|    | <u>8</u>                                                             | 569.8091            | 1137.6036       | 1137.6030       | 0.0007       | 1                    | 36           | 0.05          | 1           | K.VQVSYKGETK.A |

---

**N° in Table S1 N° spot protein identification**


---

|    |                                                                                           |                             |                 |                 |              |                      |              |               |             |                |
|----|-------------------------------------------------------------------------------------------|-----------------------------|-----------------|-----------------|--------------|----------------------|--------------|---------------|-------------|----------------|
| 34 | 1480                                                                                      | glutathione S transferase P |                 |                 |              |                      |              |               |             |                |
| 1. | GTP HUMAN                                                                                 | Mass: 23438                 | Score: 55       | Coverage: 4%    |              | number of peptides : |              | 1             |             |                |
|    | Glutathione S-transferase P (EC 2.5.1.18) (GST class-pi) (GSTP1-1)- Homo sapiens (Human). |                             |                 |                 |              |                      |              |               |             |                |
|    | Check to include this hit in error tolerant search or archive report                      |                             |                 |                 |              |                      |              |               |             |                |
|    | <b>Query</b>                                                                              | <b>Observed</b>             | <b>Mr(expt)</b> | <b>Mr(calc)</b> | <b>Delta</b> | <b>Miss</b>          | <b>Score</b> | <b>Expect</b> | <b>Rank</b> | <b>Peptide</b> |
|    | <u>4</u>                                                                                  | 568.8204                    | 1135.6262       | 1135.5696       | 0.0567       | 0                    | 55           | 0.00076       | 1           | K.ASCLYQLPK.F  |

---

**N° in Table S1 N° spot protein identification**


---

|    |                                                                      |                 |                 |                 |              |                      |              |               |             |                                  |
|----|----------------------------------------------------------------------|-----------------|-----------------|-----------------|--------------|----------------------|--------------|---------------|-------------|----------------------------------|
| 35 | 539                                                                  | TRIM29          |                 |                 |              |                      |              |               |             |                                  |
| 1. | AAH17352                                                             | Mass: 66478     | Score: 366      | Coverage: 22%   |              | number of peptides : |              | 12            |             |                                  |
|    | BC017352 NID: - Homo sapiens                                         |                 |                 |                 |              |                      |              |               |             |                                  |
|    | Check to include this hit in error tolerant search or archive report |                 |                 |                 |              |                      |              |               |             |                                  |
|    | <b>Query</b>                                                         | <b>Observed</b> | <b>Mr(expt)</b> | <b>Mr(calc)</b> | <b>Delta</b> | <b>Miss</b>          | <b>Score</b> | <b>Expect</b> | <b>Rank</b> | <b>Peptide</b>                   |
|    | <u>8</u>                                                             | 495.7635        | 989.5124        | 989.5294        | -0.0170      | 0                    | 39           | 0.038         | 1           | K.AILEQNR.D                      |
|    | <u>10</u>                                                            | 508.7827        | 1015.5508       | 1015.5702       | -0.0194      | 0                    | 41           | 0.019         | 1           | K.KPPVTFAEK.G                    |
|    | <u>11</u>                                                            | 509.7388        | 1017.4630       | 1017.4841       | -0.0211      | 0                    | 46           | 0.007         | 1           | R.YSMYLTPEK.G + Oxidation (M)    |
|    | <u>12</u>                                                            | 516.2442        | 1030.4738       | 1030.4931       | -0.0193      | 0                    | 30           | 0.22          | 1           | R.EQDAVDQVK.V                    |
|    | <u>15</u>                                                            | 535.7573        | 1069.5000       | 1069.5192       | -0.0192      | 0                    | 31           | 0.16          | 1           | K.NFNLYGK.G                      |
|    | <u>16</u>                                                            | 539.2542        | 1076.4938       | 1076.5172       | -0.0233      | 0                    | 58           | 0.00042       | 1           | K.VIMDALDER.A + Oxidation (M)    |
|    | <u>17</u>                                                            | 540.2512        | 1078.4878       | 1078.5043       | -0.0165      | 0                    | 40           | 0.022         | 1           | R.TSYQSSPGR.F                    |
|    | <u>19</u>                                                            | 586.3134        | 1170.6122       | 1170.6357       | -0.0234      | 0                    | 62           | 0.00014       | 1           | K.SLGSALKPGEGR.S                 |
|    | <u>20</u>                                                            | 588.3176        | 1174.6206       | 1174.6346       | -0.0140      | 0                    | 69           | 3.1e-005      | 1           | R.SPYAGLQLGAAK.K                 |
|    | <u>23</u>                                                            | 659.3086        | 1316.6026       | 1316.6208       | -0.0182      | 0                    | 88           | 3.5e-007      | 1           | R.SPSGSPGLENGTK.A                |
|    | <u>28</u>                                                            | 487.5707        | 1459.6903       | 1459.7341       | -0.0438      | 0                    | 44           | 0.0071        | 1           | R.KPTVSIMEPETR.R + Oxidation (M) |
|    | <u>30</u>                                                            | 827.8486        | 1653.6826       | 1653.6974       | -0.0148      | 0                    | 80           | 1.6e-006      | 1           | K.SGSEVLCDSCIGNK.Q               |

---

**N° in Table S1 N° spot protein identification**


---

|    |                                                                      |                 |                 |                 |              |                      |              |               |             |                                  |
|----|----------------------------------------------------------------------|-----------------|-----------------|-----------------|--------------|----------------------|--------------|---------------|-------------|----------------------------------|
| 36 | 525                                                                  | TRIM29          |                 |                 |              |                      |              |               |             |                                  |
| 1. | AAH17352                                                             | Mass: 66478     | Score: 304      | Coverage: 20%   |              | number of peptides : |              | 11            |             |                                  |
|    | BC017352 NID: - Homo sapiens                                         |                 |                 |                 |              |                      |              |               |             |                                  |
|    | Check to include this hit in error tolerant search or archive report |                 |                 |                 |              |                      |              |               |             |                                  |
|    | <b>Query</b>                                                         | <b>Observed</b> | <b>Mr(expt)</b> | <b>Mr(calc)</b> | <b>Delta</b> | <b>Miss</b>          | <b>Score</b> | <b>Expect</b> | <b>Rank</b> | <b>Peptide</b>                   |
|    | <u>6</u>                                                             | 433.7544        | 865.4942        | 865.4294        | 0.0649       | 0                    | 51           | 0.0018        | 1           | R.ADTGLFSR.S                     |
|    | <u>8</u>                                                             | 477.2958        | 952.5770        | 952.4978        | 0.0793       | 1                    | 38           | 0.034         | 1           | R.KSIFSES.R.K                    |
|    | <u>11</u>                                                            | 495.8099        | 989.6052        | 989.5294        | 0.0758       | 0                    | 35           | 0.08          | 1           | K.AILEQNR.D                      |
|    | <u>15</u>                                                            | 516.2980        | 1030.5814       | 1030.4931       | 0.0883       | 0                    | 30           | 0.26          | 1           | R.EQDAVDQVK.V                    |
|    | <u>22</u>                                                            | 535.8091        | 1069.6036       | 1069.5192       | 0.0844       | 0                    | 39           | 0.029         | 1           | K.NFNLYGK.G                      |
|    | <u>24</u>                                                            | 539.3118        | 1076.6090       | 1076.5172       | 0.0919       | 0                    | 57           | 0.00056       | 1           | K.VIMDALDER.A + Oxidation (M)    |
|    | <u>25</u>                                                            | 540.3068        | 1078.5990       | 1078.5043       | 0.0947       | 0                    | 52           | 0.0014        | 1           | R.TSYQSSPGR.F                    |
|    | <u>29</u>                                                            | 586.3747        | 1170.7348       | 1170.6357       | 0.0992       | 0                    | 41           | 0.017         | 1           | K.SLGSALKPGEGR.S                 |
|    | <u>31</u>                                                            | 588.3700        | 1174.7254       | 1174.6346       | 0.0909       | 0                    | 61           | 0.00019       | 1           | R.SPYAGLQLGAAK.K                 |
|    | <u>38</u>                                                            | 638.3973        | 1274.7800       | 1274.6718       | 0.1083       | 1                    | 97           | 4.3e-008      | 1           | K.AEKETELSLQK.E                  |
|    | <u>44</u>                                                            | 730.9382        | 1459.8618       | 1459.7341       | 0.1278       | 0                    | 40           | 0.017         | 1           | R.KPTVSIMEPETR.R + Oxidation (M) |

---

**N° in Table S1 N° spot protein identification**


---

|    |                                                                      |                 |                 |                 |              |                      |              |               |             |                |
|----|----------------------------------------------------------------------|-----------------|-----------------|-----------------|--------------|----------------------|--------------|---------------|-------------|----------------|
| 37 | 532                                                                  | TRIM29          |                 |                 |              |                      |              |               |             |                |
| 1. | AAH17352                                                             | Mass: 66478     | Score: 325      | Coverage: 23%   |              | number of peptides : |              | 13            |             |                |
|    | BC017352 NID: - Homo sapiens                                         |                 |                 |                 |              |                      |              |               |             |                |
|    | Check to include this hit in error tolerant search or archive report |                 |                 |                 |              |                      |              |               |             |                |
|    | <b>Query</b>                                                         | <b>Observed</b> | <b>Mr(expt)</b> | <b>Mr(calc)</b> | <b>Delta</b> | <b>Miss</b>          | <b>Score</b> | <b>Expect</b> | <b>Rank</b> | <b>Peptide</b> |

Table S2A

|    |          |           |           |        |   |    |          |   |                                  |
|----|----------|-----------|-----------|--------|---|----|----------|---|----------------------------------|
| 11 | 495.7802 | 989.5458  | 989.5294  | 0.0164 | 0 | 35 | 0.081    | 1 | K.AILEQNFR.D                     |
| 13 | 508.7993 | 1015.5840 | 1015.5702 | 0.0138 | 0 | 57 | 0.00059  | 1 | K.KPPVTFAEK.G                    |
| 14 | 509.7560 | 1017.4974 | 1017.4841 | 0.0133 | 0 | 37 | 0.051    | 1 | R.YSMYLTPK.G + Oxidation (M)     |
| 19 | 534.2936 | 1066.5726 | 1066.5659 | 0.0068 | 1 | 47 | 0.0067   | 1 | R.IKSFTTNEK.A                    |
| 20 | 535.7772 | 1069.5398 | 1069.5192 | 0.0206 | 0 | 24 | 0.94     | 1 | K.NFNLYGK.G                      |
| 21 | 539.2730 | 1076.5314 | 1076.5172 | 0.0143 | 0 | 58 | 0.00043  | 1 | K.VIMDALDER.A + Oxidation (M)    |
| 22 | 540.2622 | 1078.5098 | 1078.5043 | 0.0055 | 0 | 47 | 0.0042   | 1 | R.TSYQPSSPGR.F                   |
| 24 | 575.7990 | 1149.5834 | 1149.5567 | 0.0268 | 0 | 38 | 0.033    | 1 | R.SALFAGNEWR.R                   |
| 25 | 586.3337 | 1170.6528 | 1170.6357 | 0.0172 | 0 | 62 | 0.00013  | 1 | K.SLGSALKPGEGR.S                 |
| 26 | 588.3377 | 1174.6608 | 1174.6346 | 0.0262 | 0 | 74 | 9.4e-006 | 1 | R.SPYAGLQLGAAK.K                 |
| 32 | 730.8862 | 1459.7578 | 1459.7341 | 0.0238 | 0 | 47 | 0.0037   | 1 | R.KPTVSIMEPETR.R + Oxidation (M) |
| 33 | 827.8808 | 1653.7470 | 1653.6974 | 0.0496 | 0 | 70 | 1.7e-005 | 1 | K.SGSEEVLCDSICGNK.Q              |
| 34 | 567.2976 | 1698.8710 | 1698.8537 | 0.0173 | 1 | 23 | 0.8      | 1 | R.AALEQREQDAVDQVK.V              |

## N° in Table S1 N° spot protein identification

|                                                                      |          |                                       |              |            |              |                      |         |      |                                |
|----------------------------------------------------------------------|----------|---------------------------------------|--------------|------------|--------------|----------------------|---------|------|--------------------------------|
| 38                                                                   | 445      | DNA mismatch repair protein<br>I64819 | Mass: 105418 | Score: 115 | Coverage: 3% | number of peptides : | 4       |      |                                |
| DNA mismatch repair protein - human                                  |          |                                       |              |            |              |                      |         |      |                                |
| Check to include this hit in error tolerant search or archive report |          |                                       |              |            |              |                      |         |      |                                |
| Query                                                                | Observed | Mr(expt)                              | Mr(calc)     | Delta      | Miss         | Score                | Expect  | Rank | Peptide                        |
| 6                                                                    | 489.2871 | 976.5596                              | 976.5593     | 0.0003     | 0            | 47                   | 0.0052  | 1    | K.IIQEFLSK.V                   |
| 12                                                                   | 547.2869 | 1092.5592                             | 1092.5597    | -0.0005    | 0            | 45                   | 0.0066  | 1    | K.MQSTLISAAR.D + Oxidation (M) |
| 14                                                                   | 558.3027 | 1114.5908                             | 1114.5982    | -0.0074    | 0            | 59                   | 0.00027 | 1    | R.QTLQEDLLR.R                  |
| 18                                                                   | 599.3032 | 1196.5918                             | 1196.5925    | -0.0006    | 0            | 57                   | 0.00044 | 1    | K.LTSLNEEYTK.N                 |

## N° in Table S1 N° spot protein identification

|                                                                           |                                                                      |                           |             |            |               |                      |          |      |                                    |
|---------------------------------------------------------------------------|----------------------------------------------------------------------|---------------------------|-------------|------------|---------------|----------------------|----------|------|------------------------------------|
| 39 and 69                                                                 | 967                                                                  | PAI-2 and/or GA17 protein |             |            |               |                      |          |      |                                    |
| 39                                                                        |                                                                      | AAA36413                  | Mass: 46939 | Score: 769 | Coverage: 29% | number of peptides : | 11       |      |                                    |
| HUMPAI2 NID: - Homo sapiens                                               |                                                                      |                           |             |            |               |                      |          |      |                                    |
| 1.                                                                        | Check to include this hit in error tolerant search or archive report |                           |             |            |               |                      |          |      |                                    |
| Query                                                                     | Observed                                                             | Mr(expt)                  | Mr(calc)    | Delta      | Miss          | Score                | Expect   | Rank | Peptide                            |
| 10                                                                        | 499.7111                                                             | 997.4076                  | 997.4287    | -0.0211    | 0             | 65                   | 6.2e-005 | 1    | R.ANFGMSER.N                       |
| 15                                                                        | 544.7617                                                             | 1087.5088                 | 1087.5298   | -0.0209    | 0             | 42                   | 0.014    | 1    | K.LEEHYELR.S                       |
| 19                                                                        | 554.3125                                                             | 1106.6104                 | 1106.6236   | -0.0132    | 1             | 54                   | 0.001    | 1    | K.KLNGLYPFR.V                      |
| 29                                                                        | 573.2240                                                             | 1144.4334                 | 1144.4529   | -0.0194    | 0             | 58                   | 0.00038  | 1    | R.SMGMEDAFNK.G + Oxidation (M)     |
| 39                                                                        | 585.7743                                                             | 1169.5340                 | 1169.5573   | -0.0232    | 0             | 46                   | 0.0045   | 1    | R.TPVQMMYLR.E + 2 Oxidation (M)    |
| 44                                                                        | 589.3212                                                             | 1176.6278                 | 1176.6390   | -0.0112    | 0             | 66                   | 5.2e-005 | 1    | K.LNIGYEDLK.A                      |
| 48                                                                        | 600.3218                                                             | 1198.6290                 | 1198.6420   | -0.0130    | 0             | 66                   | 5.9e-005 | 1    | R.MVLVNAVYFK.G + Oxidation (M)     |
| 55                                                                        | 419.8683                                                             | 1256.5831                 | 1256.6149   | -0.0318    | 1             | 55                   | 0.00071  | 1    | K.SASFREYIR.L                      |
| 61                                                                        | 458.8525                                                             | 1373.5357                 | 1373.5704   | -0.0347    | 1             | 62                   | 0.00014  | 1    | R.SMGMEDAFNKGR.A + 2 Oxidation (M) |
| 68                                                                        | 774.3855                                                             | 1546.7564                 | 1546.7627   | -0.0063    | 0             | 77                   | 4.1e-006 | 1    | K.GSYPDAILQAQAADK.I                |
| 70                                                                        | 791.9081                                                             | 1581.8016                 | 1581.7999   | 0.0018     | 0             | 53                   | 0.00099  | 1    | K.IPNLLPEGSVDGDR.M                 |
| 69                                                                        |                                                                      | Q96KM8 HUMAN              | Mass: 42932 | Score: 133 | Coverage: 14% | number of peptides : | 4        |      |                                    |
| DJ69B10.1 (GA17 protein) (Dendritic cell protein).- Homo sapiens (Human). |                                                                      |                           |             |            |               |                      |          |      |                                    |
| 2.                                                                        | Check to include this hit in error tolerant search or archive report |                           |             |            |               |                      |          |      |                                    |
| Query                                                                     | Observed                                                             | Mr(expt)                  | Mr(calc)    | Delta      | Miss          | Score                | Expect   | Rank | Peptide                            |
| 31                                                                        | 573.7905                                                             | 1145.5664                 | 1145.5791   | -0.0126    | 0             | 29                   | 0.26     | 1    | R.YTVYCSLIK.V                      |
| 52                                                                        | 416.2153                                                             | 1245.6241                 | 1245.6578   | -0.0337    | 1             | 38                   | 0.035    | 1    | K.FREGERPSLR.L                     |
| 60                                                                        | 451.2396                                                             | 1350.6970                 | 1350.7217   | -0.0247    | 1             | 40                   | 0.018    | 1    | R.LLYEALVDCKK.S                    |
| 63                                                                        | 693.3398                                                             | 1384.6650                 | 1384.6731   | -0.0080    | 0             | 83                   | 1.1e-006 | 1    | R.LLTFMGMAVENK.E + 2 Oxidation (M) |

## N° in Table S1 N° spot protein identification

|                                                                                     |          |           |           |        |      |       |             |           |                                  |                      |   |
|-------------------------------------------------------------------------------------|----------|-----------|-----------|--------|------|-------|-------------|-----------|----------------------------------|----------------------|---|
| 40                                                                                  | 1118     | PAI-2     |           |        |      |       |             |           |                                  |                      |   |
| 1.                                                                                  | 1BY7A    |           |           |        |      |       | Mass: 40607 | Score: 82 | Coverage: 7%                     | number of peptides : | 3 |
| plasminogen activator inhibitor-2 mutant RESIDUES 66-98 EXCISED - human (fragments) |          |           |           |        |      |       |             |           |                                  |                      |   |
| Check to include this hit in error tolerant search or archive report                |          |           |           |        |      |       |             |           |                                  |                      |   |
| Query                                                                               | Observed | Mr(expt)  | Mr(calc)  | Delta  | Miss | Score | Expect      | Rank      | Peptide                          |                      |   |
| 13                                                                                  | 544.7851 | 1087.5556 | 1087.5298 | 0.0259 | 0    | 50    | 0.0025      | 1         | K.LEEHYELR.S                     |                      |   |
| 14                                                                                  | 581.2483 | 1160.4820 | 1160.4478 | 0.0342 | 0    | 43    | 0.012       | 1         | R.SMGMEDAFNK.G + 2 Oxidation (M) |                      |   |
| 15                                                                                  | 585.8010 | 1169.5874 | 1169.5573 | 0.0302 | 0    | 38    | 0.031       | 1         | R.TPVQMMYLR.E + 2 Oxidation (M)  |                      |   |

## N° in Table S1 N° spot protein identification

|        |      |       |  |  |  |  |             |            |               |                      |    |
|--------|------|-------|--|--|--|--|-------------|------------|---------------|----------------------|----|
| 41     | 1001 | PAI-2 |  |  |  |  |             |            |               |                      |    |
| A32853 |      |       |  |  |  |  | Mass: 46851 | Score: 561 | Coverage: 19% | number of peptides : | 10 |

Table S2A

plasminogen activator inhibitor 2 precursor - human  
 Check to include this hit in error tolerant search or archive report

| Query | Precursor mass |           | Mr(calc)  | mass error observed<br>Delta | Miss | Score | Expect   | Rank | peptide sequence<br>Peptide        |
|-------|----------------|-----------|-----------|------------------------------|------|-------|----------|------|------------------------------------|
|       | Observed       | Mr(expt)  |           |                              |      |       |          |      |                                    |
| 6     | 468.2933       | 934.5720  | 934.4912  | 0.0808                       | 1    | 32    | 0.2      | 1    | K.WKTFFEK.K                        |
| 10    | 490.3109       | 978.6072  | 978.5287  | 0.0786                       | 0    | 37    | 0.055    | 1    | K.LNGLYPFR.V                       |
| 15    | 507.7589       | 1013.5032 | 1013.4236 | 0.0796                       | 0    | 57    | 0.00053  | 1    | R.ANFGMSER.N + Oxidation (M)       |
| 23    | 544.8186       | 1087.6226 | 1087.5298 | 0.0929                       | 0    | 46    | 0.0057   | 1    | K.LEEHYELR.S                       |
| 27    | 554.3665       | 1106.7184 | 1106.6236 | 0.0948                       | 1    | 56    | 0.00063  | 1    | K.KLNLGYPFR.V                      |
| 34    | 573.2828       | 1144.5510 | 1144.4529 | 0.0982                       | 0    | 66    | 6.1e-005 | 1    | R.SMGMEDAFNK.G + Oxidation (M)     |
| 36    | 577.8364       | 1153.6582 | 1153.5624 | 0.0959                       | 0    | 48    | 0.0035   | 1    | R.TPVQMMYLR.E + Oxidation (M)      |
| 51    | 600.3798       | 1198.7450 | 1198.6420 | 0.1030                       | 0    | 53    | 0.0011   | 1    | R.MVLVNAVYFK.G + Oxidation (M)     |
| 59    | 458.8971       | 1373.6695 | 1373.5704 | 0.0991                       | 1    | 57    | 0.00036  | 1    | R.SMGMEDAFNKGR.A + 2 Oxidation (M) |
| 63    | 774.4555       | 1546.8964 | 1546.7627 | 0.1337                       | 0    | 80    | 1.7e-006 | 1    | K.GSYPDAILQAQADK.I                 |

N° in Table S1 N° spot protein identification

|           |      |                                                                                     |             |            |               |        |      |                      |          |      |                                 |
|-----------|------|-------------------------------------------------------------------------------------|-------------|------------|---------------|--------|------|----------------------|----------|------|---------------------------------|
| 42 and 45 | 1145 | Activator of 90 kDa heat shock protein ATPase homolog 1 (p38K protein) and/or PAI-2 |             |            |               |        |      |                      |          |      |                                 |
|           | 1.   | JC7769                                                                              | Mass: 38421 | Score: 281 | Coverage: 24% |        |      | number of peptides : | 10       |      |                                 |
|           |      | 38K protein - human                                                                 |             |            |               |        |      |                      |          |      |                                 |
|           |      | Check to include this hit in error tolerant search or archive report                |             |            |               |        |      |                      |          |      |                                 |
|           |      | Query                                                                               | Observed    | Mr(expt)   | Mr(calc)      | Delta  | Miss | Score                | Expect   | Rank | Peptide                         |
|           |      | 8                                                                                   | 416.2300    | 830.4454   | 830.4286      | 0.0168 | 0    | 38                   | 0.047    | 1    | R.WIVEER.LA                     |
|           |      | 14                                                                                  | 450.2289    | 898.4432   | 898.4297      | 0.0135 | 0    | 41                   | 0.018    | 1    | K.QTFYGAR.L                     |
|           |      | 16                                                                                  | 453.7452    | 905.4758   | 905.4607      | 0.0152 | 0    | 61                   | 0.00022  | 1    | K.LNWTGTSK.S                    |
|           |      | 22                                                                                  | 476.2354    | 950.4562   | 950.4379      | 0.0184 | 0    | 31                   | 0.19     | 1    | K.CEVTEVSK.L                    |
|           |      | 25                                                                                  | 499.2602    | 996.5058   | 996.4876      | 0.0183 | 0    | 49                   | 0.003    | 1    | R.GIPAPEER.T                    |
|           |      | 33                                                                                  | 544.7806    | 1087.5466  | 1087.5258     | 0.0209 | 0    | 68                   | 4.3e-005 | 1    | K.LDGEASINNR.K                  |
|           |      | 48                                                                                  | 608.8310    | 1215.6474  | 1215.6207     | 0.0267 | 1    | 36                   | 0.051    | 1    | K.LDGEASINNR.K                  |
|           |      | 50                                                                                  | 621.3438    | 1240.6730  | 1240.6373     | 0.0357 | 0    | 58                   | 0.00028  | 1    | R.EAMGIYSLK.T + Oxidation (M)   |
|           |      | 52                                                                                  | 656.2836    | 1310.5526  | 1310.5231     | 0.0296 | 0    | 52                   | 0.0014   | 1    | K.NGETELCMGR.G + Oxidation (M)  |
|           |      | 53                                                                                  | 681.3518    | 1360.6890  | 1360.6544     | 0.0346 | 0    | 78                   | 3.4e-006 | 1    | K.DEPTNLVALMK.E + Oxidation (M) |
|           |      | 1BY7A                                                                               | Mass: 40607 | Score: 245 | Coverage: 12% |        |      | number of peptides : | 4        |      |                                 |
|           |      | plasminogen activator inhibitor-2 mutant RESIDUES 66-98 EXCISED - human (fragments) |             |            |               |        |      |                      |          |      |                                 |
|           | 2.   | Check to include this hit in error tolerant search or archive report                |             |            |               |        |      |                      |          |      |                                 |
| 42        |      | Query                                                                               | Observed    | Mr(expt)   | Mr(calc)      | Delta  | Miss | Score                | Expect   | Rank | Peptide                         |
|           |      | 27                                                                                  | 507.7288    | 1013.4430  | 1013.4236     | 0.0194 | 0    | 56                   | 0.00067  | 1    | R.ANFGMSER.N + Oxidation (M)    |
|           |      | 34                                                                                  | 544.7822    | 1087.5498  | 1087.5298     | 0.0201 | 0    | 53                   | 0.0012   | 1    | K.LEEHYELR.S                    |
|           |      | 39                                                                                  | 573.2462    | 1144.4778  | 1144.4529     | 0.0250 | 0    | 68                   | 3.3e-005 | 1    | R.SMGMEDAFNK.G + Oxidation (M)  |
|           |      | 45                                                                                  | 585.7980    | 1169.5814  | 1169.5573     | 0.0242 | 0    | 43                   | 0.011    | 1    | R.TPVQMMYLR.E + 2 Oxidation (M) |

N° in Table S1 N° spot protein identification

|    |      |                                                                      |             |            |               |        |      |                      |          |      |                 |
|----|------|----------------------------------------------------------------------|-------------|------------|---------------|--------|------|----------------------|----------|------|-----------------|
| 43 | 1214 | Maspin                                                               |             |            |               |        |      |                      |          |      |                 |
|    | 1.   | A36898                                                               | Mass: 42568 | Score: 201 | Coverage: 18% |        |      | number of peptides : | 10       |      |                 |
|    |      | maspin - human                                                       |             |            |               |        |      |                      |          |      |                 |
|    |      | Check to include this hit in error tolerant search or archive report |             |            |               |        |      |                      |          |      |                 |
|    |      | Query                                                                | Observed    | Mr(expt)   | Mr(calc)      | Delta  | Miss | Score                | Expect   | Rank | Peptide         |
|    |      | 8                                                                    | 437.2598    | 872.5050   | 872.4716      | 0.0335 | 0    | 27                   | 0.69     | 1    | K.GQINNSIK.D    |
|    |      | 11                                                                   | 472.7778    | 943.5410   | 943.5015      | 0.0396 | 0    | 34                   | 0.11     | 1    | K.LSSFYSLK.L    |
|    |      | 13                                                                   | 483.2683    | 964.5220   | 964.4865      | 0.0355 | 1    | 36                   | 0.07     | 1    | K.KFPESETK.E    |
|    |      | 16                                                                   | 490.7701    | 979.5256   | 979.4862      | 0.0394 | 0    | 47                   | 0.0046   | 1    | K.ELETVDK.L     |
|    |      | 19                                                                   | 509.2957    | 1016.5768  | 1016.5324     | 0.0444 | 0    | 62                   | 0.00018  | 1    | K.ACLENLGLK.H   |
|    |      | 29                                                                   | 551.3464    | 1100.6782  | 1100.6230     | 0.0553 | 0    | 35                   | 0.067    | 1    | K.IIILPFQNK.H   |
|    |      | 33                                                                   | 611.3006    | 1220.5866  | 1220.5408     | 0.0458 | 0    | 80                   | 2.7e-006 | 1    | K.DVEDESTGLEK.I |
|    |      | 34                                                                   | 612.3372    | 1222.6598  | 1222.6081     | 0.0517 | 1    | 69                   | 2.9e-005 | 1    | K.ELETVDK.L     |
|    |      | 33                                                                   | 611.3006    | 1220.5866  | 1220.5408     | 0.0458 | 0    | 80                   | 5e-006   | 1    | K.DVEDESTGLEK.I |
|    |      | 34                                                                   | 612.3372    | 1222.6598  | 1222.6081     | 0.0518 | 1    | 69                   | 5.9e-005 | 1    | K.ELETVDK.L     |

N° in Table S1 N° spot protein identification

44 see on N°22  
 45 see on N°42  
 46 see on N°23  
 47 see on N°26

N° in Table S1 N° spot protein identification

|    |     |                                                                      |             |            |               |        |      |                      |        |      |              |
|----|-----|----------------------------------------------------------------------|-------------|------------|---------------|--------|------|----------------------|--------|------|--------------|
| 48 | 648 | protein disulfide-isomerase precursor                                |             |            |               |        |      |                      |        |      |              |
|    | 1.  | ISHUSS                                                               | Mass: 57480 | Score: 318 | Coverage: 21% |        |      | number of peptides : | 12     |      |              |
|    |     | protein disulfide-isomerase (EC 5.3.4.1) precursor - human           |             |            |               |        |      |                      |        |      |              |
|    |     | Check to include this hit in error tolerant search or archive report |             |            |               |        |      |                      |        |      |              |
|    |     | Query                                                                | Observed    | Mr(expt)   | Mr(calc)      | Delta  | Miss | Score                | Expect | Rank | Peptide      |
|    |     | 1                                                                    | 404.7610    | 807.5074   | 807.4491      | 0.0584 | 1    | 35                   | 0.072  | 1    | R.TLDGFK.F   |
|    |     | 5                                                                    | 431.7678    | 861.5210   | 861.4596      | 0.0615 | 0    | 29                   | 0.35   | 1    | K.ALAPEYAK.A |
|    |     | 8                                                                    | 455.7581    | 909.5016   | 909.4345      | 0.0672 | 0    | 35                   | 0.082  | 1    | K.FPASADR.T  |



Table S2A

|           |          |           |           |        |   |     |          |   |                                  |
|-----------|----------|-----------|-----------|--------|---|-----|----------|---|----------------------------------|
| <u>10</u> | 464.8001 | 927.5856  | 927.5178  | 0.0678 | 0 | 40  | 0.023    | 1 | K.VHSFPTLK.F                     |
| <u>11</u> | 481.7663 | 961.5180  | 961.4440  | 0.0741 | 0 | 55  | 0.00082  | 1 | R.ITEFCHR.F                      |
| <u>12</u> | 485.8084 | 969.6022  | 969.5284  | 0.0739 | 0 | 35  | 0.065    | 1 | K.QLAPIWDK.L                     |
| <u>13</u> | 501.8189 | 1001.6232 | 1001.5505 | 0.0727 | 1 | 48  | 0.0043   | 1 | K.LKAEGSEIR.L                    |
| <u>14</u> | 519.2869 | 1036.5592 | 1036.4825 | 0.0767 | 0 | 48  | 0.0034   | 1 | R.NNFEGEVTK.E                    |
| <u>18</u> | 579.8451 | 1157.6756 | 1157.5829 | 0.0928 | 0 | 41  | 0.019    | 1 | K.SNFAEALAAHK.Y                  |
| <u>19</u> | 611.8619 | 1221.7092 | 1221.6162 | 0.0930 | 0 | 56  | 0.0005   | 1 | R.LITLLEEMTK.Y + Oxidation (M)   |
| <u>22</u> | 655.3495 | 1308.6844 | 1308.5867 | 0.0977 | 0 | 100 | 2.3e-008 | 1 | K.MDSTANEVEAVK.V + Oxidation (M) |
| <u>23</u> | 484.6019 | 1450.7839 | 1450.6939 | 0.0899 | 0 | 34  | 0.07     | 1 | K.YKPESELTAERI                   |

## N° in Table S1 N° spot protein identification

49 see on N°4  
50 see on N°13

## N° in Table S1 N° spot protein identification

51 1235 nucleophosmin

1. Q6V962 HUMAN Mass: 32754 Score: 251 Coverage: 19%  
Nucleophosmin.- Homo sapiens (Human).

number of peptides : 5

| Query     | Observed | Mr(expt)  | Mr(calc)  | Delta  | Miss | Score | Expect   | Rank | Peptide           |
|-----------|----------|-----------|-----------|--------|------|-------|----------|------|-------------------|
| <u>2</u>  | 403.7180 | 805.4214  | 805.4004  | 0.0211 | 0    | 30    | 0.31     | 1    | K.MQASIEK.G       |
| <u>7</u>  | 466.2529 | 930.4912  | 930.4658  | 0.0254 | 0    | 52    | 0.0015   | 1    | K.GPSSVEDIK.A     |
| <u>11</u> | 512.2606 | 1022.5066 | 1022.4821 | 0.0245 | 1    | 29    | 0.3      | 1    | K.ADKDYHFK.V      |
| <u>15</u> | 565.8221 | 1129.6296 | 1129.5979 | 0.0318 | 1    | 84    | 8.3e-007 | 1    | K.GPSSVEDIKAK.M   |
| <u>19</u> | 784.8965 | 1567.7784 | 1567.7226 | 0.0558 | 0    | 125   | 5.8e-011 | 1    | K.VDNDENEHQLSLR.T |

## N° in Table S1 N° spot protein identification

52 1277 nucleophosmin

1. Q6V962 HUMAN Mass: 32754 Score: 53 Coverage: 3%  
Nucleophosmin.- Homo sapiens (Human).

number of peptides : 1

| Query    | Observed | Mr(expt) | Mr(calc) | Delta  | Miss | Score | Expect | Rank | Peptide       |
|----------|----------|----------|----------|--------|------|-------|--------|------|---------------|
| <u>5</u> | 466.2403 | 930.4660 | 930.4658 | 0.0003 | 0    | 53    | 0.0015 | 1    | K.GPSSVEDIK.A |

## N° in Table S1 N° spot protein identification

53 502 glycerol-3-phosphate dehydrogenase mitochondrial precursor

1. G02093 Mass: 81296 Score: 308 Coverage: 17%  
glycerol-3-phosphate dehydrogenase (EC 1.1.99.5), mitochondrial precursor - human

number of peptides : 13

| Query     | Observed | Mr(expt)  | Mr(calc)  | Delta   | Miss | Score | Expect   | Rank | Peptide                          |
|-----------|----------|-----------|-----------|---------|------|-------|----------|------|----------------------------------|
| <u>5</u>  | 417.2313 | 832.4480  | 832.4477  | 0.0004  | 0    | 35    | 0.081    | 1    | R.IVELMGR.E + Oxidation (M)      |
| <u>9</u>  | 468.7446 | 935.4746  | 935.4712  | 0.0034  | 0    | 30    | 0.23     | 1    | K.LDIEQYR.M                      |
| <u>10</u> | 474.2262 | 946.4378  | 946.4356  | 0.0023  | 0    | 48    | 0.0044   | 1    | K.TAEENLDR.R                     |
| <u>11</u> | 476.2918 | 950.5690  | 950.5661  | 0.0029  | 1    | 39    | 0.031    | 1    | R.RVPIVD.R.S                     |
| <u>12</u> | 487.7498 | 973.4850  | 973.4828  | 0.0022  | 0    | 31    | 0.22     | 1    | K.QEQLTAR.K                      |
| <u>13</u> | 491.8055 | 981.5964  | 981.5872  | 0.0092  | 1    | 24    | 0.8      | 1    | K.RWPIVGR.L                      |
| <u>15</u> | 510.3004 | 1018.5862 | 1018.5811 | 0.0051  | 0    | 33    | 0.15     | 1    | R.TVGLFLQGGK.D                   |
| <u>20</u> | 580.8322 | 1159.6498 | 1159.6383 | 0.0116  | 0    | 53    | 0.0013   | 1    | R.MNLAIALTAAR.Y + Oxidation (M)  |
| <u>22</u> | 605.7971 | 1209.5796 | 1209.5666 | 0.0131  | 1    | 26    | 0.59     | 1    | R.ELNWDYKQ.K                     |
| <u>23</u> | 615.3274 | 1228.6402 | 1228.6274 | 0.0128  | 0    | 24    | 0.97     | 1    | R.ALEHFPMLQK.D + Oxidation (M)   |
| <u>25</u> | 627.7998 | 1253.5850 | 1253.5710 | 0.0140  | 0    | 50    | 0.0022   | 1    | R.NYLSCDVEVR.R                   |
| <u>26</u> | 633.3107 | 1264.6068 | 1264.5969 | 0.0100  | 0    | 75    | 6.9e-006 | 1    | R.SMAEDTINAIVK.T + Oxidation (M) |
| <u>29</u> | 576.6112 | 1726.8118 | 1726.8122 | -0.0004 | 1    | 110   | 1.5e-009 | 1    | K.TALVERDDFSSGTSSR.S             |

## N° in Table S1 N° spot protein identification

54 876 3-hydroxy-3-methylglutaryl-Coenzyme A synthase 1

Q5XJ04 HUMAN Mass: 57854 Score: 264 Coverage: 15%  
3-hydroxy-3-methylglutaryl-Coenzyme A synthase 1 (Soluble).- Homo sapiens (Human).

number of peptides : 8

| Query     | Observed | Mr(expt)  | Mr(calc)  | Delta   | Miss | Score | Expect   | Rank | Peptide                            |
|-----------|----------|-----------|-----------|---------|------|-------|----------|------|------------------------------------|
| <u>19</u> | 475.7649 | 949.5152  | 949.5233  | -0.0080 | 0    | 36    | 0.061    | 1    | K.YTIGLQAK.M                       |
| <u>25</u> | 498.7495 | 995.4844  | 995.4924  | -0.0079 | 0    | 49    | 0.0029   | 1    | K.ASSELSQK.T                       |
| <u>31</u> | 510.7700 | 1019.5254 | 1019.5321 | -0.0067 | 0    | 53    | 0.0013   | 1    | K.ITASCLDK.S                       |
| <u>35</u> | 529.7398 | 1057.4650 | 1057.4716 | -0.0066 | 0    | 37    | 0.073    | 1    | K.LEDTYFDR.D                       |
| <u>57</u> | 606.2737 | 1210.5328 | 1210.5401 | -0.0072 | 0    | 33    | 0.098    | 1    | R.NNLSYDCIGRL                      |
| <u>60</u> | 609.3322 | 1216.6498 | 1216.6551 | -0.0052 | 0    | 89    | 3.2e-007 | 1    | R.LEVGTETIDK.S                     |
| <u>64</u> | 651.8274 | 1301.6402 | 1301.6463 | -0.0061 | 0    | 65    | 6.7e-005 | 1    | K.VTQDATPGSALDK.I                  |
| <u>70</u> | 697.8307 | 1393.6468 | 1393.6548 | -0.0079 | 0    | 62    | 0.00012  | 1    | R.TGVAPDVFAENMKL.L + Oxidation (M) |

## N° in Table S1 N° spot protein identification

Table S2A

| 55 and 56                                                            | 1327     | Triosephosphate isomerase and ETHE1 protein                                                       |             |              |               |                      |               |                      |                 |      |                   |  |
|----------------------------------------------------------------------|----------|---------------------------------------------------------------------------------------------------|-------------|--------------|---------------|----------------------|---------------|----------------------|-----------------|------|-------------------|--|
| 55                                                                   | 1.       | TPIS_HUMAN                                                                                        | Mass: 26807 | Score: 495   | Coverage: 36% | number of peptides : |               | 8                    |                 |      |                   |  |
|                                                                      |          | Triosephosphate isomerase (EC 5.3.1.1) (TIM) (Triose-phosphate isomerase).- Homo sapiens (Human). |             |              |               |                      |               |                      |                 |      |                   |  |
|                                                                      |          | Check to include this hit in error tolerant search or archive report                              |             |              |               |                      |               |                      |                 |      |                   |  |
|                                                                      |          | Query                                                                                             | Observed    | Mr(expt)     | Mr(calc)      | Delta                | Miss          | Score                | Expect          | Rank | Peptide           |  |
|                                                                      |          | <u>6</u>                                                                                          | 425.7690    | 849.5234     | 849.4596      | 0.0638               | 0             | 25                   | 0.95            | 1    | K.VVFEQTK.V       |  |
|                                                                      |          | <u>14</u>                                                                                         | 569.3334    | 1136.6522    | 1136.5648     | 0.0874               | 0             | 64                   | 0.0001          | 1    | K.JAVAAQNCYK.V    |  |
|                                                                      |          | <u>17</u>                                                                                         | 617.8522    | 1233.6898    | 1233.5949     | 0.0949               | 0             | 81                   | 1.7e-006        | 1    | K.SNVSDAVAQSTR.I  |  |
|                                                                      |          | <u>19</u>                                                                                         | 630.8740    | 1259.7334    | 1259.6357     | 0.0977               | 1             | 45                   | 0.0077          | 1    | K.LDEREAGTEK.V    |  |
|                                                                      |          | <u>20</u>                                                                                         | 425.5896    | 1273.7470    | 1273.6666     | 0.0803               | 1             | 80                   | 2.5e-006        | 1    | K.VIADNVKDWSK.V   |  |
|                                                                      |          | <u>24</u>                                                                                         | 663.8861    | 1325.7576    | 1325.6649     | 0.0927               | 0             | 107                  | 3.8e-009        | 1    | R.IIYGSVTGATCK.E  |  |
|                                                                      |          | <u>30</u>                                                                                         | 729.9150    | 1457.8154    | 1457.7151     | 0.1004               | 0             | 59                   | 0.00026         | 1    | R.HVFGESDELIGQK.V |  |
|                                                                      |          | <u>31</u>                                                                                         | 489.6155    | 1465.8247    | 1465.7161     | 0.1086               | 0             | 72                   | 9.7e-006        | 1    | K.TATPQQAQEVHEK.L |  |
|                                                                      |          | 56                                                                                                | 2.          | O95571_HUMAN | Mass: 28368   | Score: 53            | Coverage: 12% | number of peptides : |                 | 2    |                   |  |
| HSCO protein (ETHE1 protein).- Homo sapiens (Human).                 |          |                                                                                                   |             |              |               |                      |               |                      |                 |      |                   |  |
| Check to include this hit in error tolerant search or archive report |          |                                                                                                   |             |              |               |                      |               |                      |                 |      |                   |  |
| Query                                                                | Observed | Mr(expt)                                                                                          | Mr(calc)    | Delta        | Miss          | Score                | Expect        | Rank                 | Peptide         |      |                   |  |
| <u>12</u>                                                            | 527.7763 | 1053.5380                                                                                         | 1053.4549   | 0.0831       | 0             | 36                   | 0.061         | 1                    | R.TDFQOGCAK.T   |      |                   |  |
| <u>23</u>                                                            | 658.9011 | 1315.7876                                                                                         | 1315.6918   | 0.0959       | 0             | 27                   | 0,5           | 1                    | R.SLLPGQSVISR.L |      |                   |  |

## N° in Table S1 N° spot protein identification

| 57 | 1056 | ubiquinol-cytochrome-c reductase                                                                   |             |            |               |                      |      |       |          |      |                            |  |
|----|------|----------------------------------------------------------------------------------------------------|-------------|------------|---------------|----------------------|------|-------|----------|------|----------------------------|--|
|    | 1.   | AAH09586                                                                                           | Mass: 53297 | Score: 296 | Coverage: 15% | number of peptides : |      | 8     |          |      |                            |  |
|    |      | BC009586 NID: - Homo sapiens ubiquinol-cytochrome-c reductase (EC 1.10.2.2) core protein I - human |             |            |               |                      |      |       |          |      |                            |  |
|    |      | Check to include this hit in error tolerant search or archive report                               |             |            |               |                      |      |       |          |      |                            |  |
|    |      | Query                                                                                              | Observed    | Mr(expt)   | Mr(calc)      | Delta                | Miss | Score | Expect   | Rank | Peptide                    |  |
|    |      | <u>2</u>                                                                                           | 405.2122    | 808.4098   | 808.4079      | 0.0019               | 0    | 30    | 0.24     | 1    | R.FTGSSEIR.H               |  |
|    |      | <u>11</u>                                                                                          | 456.7258    | 911.4370   | 911.4324      | 0.0047               | 0    | 55    | 0.00059  | 1    | R.SGMFWLRF + Oxidation (M) |  |
|    |      | <u>16</u>                                                                                          | 512.7612    | 1023.5078  | 1023.5025     | 0.0053               | 0    | 34    | 0.079    | 1    | R.EHTAYYIKA                |  |
|    |      | <u>23</u>                                                                                          | 529.7980    | 1057.5814  | 1057.5768     | 0.0047               | 0    | 54    | 0.0014   | 1    | R.IAEVDASVVR.E             |  |
|    |      | <u>26</u>                                                                                          | 550.7949    | 1099.5752  | 1099.5662     | 0.0091               | 0    | 48    | 0.0042   | 1    | R.IPLAEWESR.I              |  |
|    |      | <u>42</u>                                                                                          | 605.7517    | 1209.4888  | 1209.4754     | 0.0135               | 0    | 42    | 0.016    | 1    | R.EMOENDASMR.D             |  |
|    |      | <u>47</u>                                                                                          | 628.8456    | 1255.6766  | 1255.6673     | 0.0094               | 1    | 55    | 0.00075  | 1    | R.RIPLAEWESR.I             |  |
|    |      | <u>52</u>                                                                                          | 662.3275    | 1322.6404  | 1322.6136     | 0.0268               | 0    | 92    | 1.3e-007 | 1    | R.LCTSATESEVAR.G           |  |

## N° in Table S1 N° spot protein identification

| 58 | 266 | EF-2                                                                 |             |            |               |                      |      |       |          |      |                                   |  |
|----|-----|----------------------------------------------------------------------|-------------|------------|---------------|----------------------|------|-------|----------|------|-----------------------------------|--|
| 58 | 1.  | EF2_HUMAN                                                            | Mass: 96115 | Score: 581 | Coverage: 22% | number of peptides : |      | 16    |          |      |                                   |  |
|    |     | Elongation factor 2 (EF-2).- Homo sapiens (Human).                   |             |            |               |                      |      |       |          |      |                                   |  |
|    |     | Check to include this hit in error tolerant search or archive report |             |            |               |                      |      |       |          |      |                                   |  |
|    |     | Query                                                                | Observed    | Mr(expt)   | Mr(calc)      | Delta                | Miss | Score | Expect   | Rank | Peptide                           |  |
|    |     | <u>5</u>                                                             | 427.2063    | 852.3980   | 852.4197      | -0.0217              | 0    | 24    | 0.78     | 1    | R.TILMMGR.Y + 2 Oxidation (M)     |  |
|    |     | <u>8</u>                                                             | 456.2040    | 910.3934   | 910.4185      | -0.0250              | 0    | 30    | 0.19     | 1    | R.YFDPANGK.F                      |  |
|    |     | <u>14</u>                                                            | 507.2425    | 1012.4704  | 1012.4938     | -0.0233              | 0    | 38    | 0.036    | 1    | K.GEGQLGPAER.A                    |  |
|    |     | <u>20</u>                                                            | 536.2560    | 1070.4974  | 1070.5140     | -0.0166              | 0    | 40    | 0.023    | 1    | K.GPLMMYISK.M + 2 Oxidation (M)   |  |
|    |     | <u>23</u>                                                            | 546.2878    | 1090.5610  | 1090.5771     | -0.0161              | 0    | 43    | 0.013    | 1    | -VNFTVDQIR.A                      |  |
|    |     | <u>24</u>                                                            | 547.2584    | 1092.5022  | 1092.5274     | -0.0251              | 0    | 33    | 0.11     | 1    | R.IMGPNYTPGK.K + Oxidation (M)    |  |
|    |     | <u>26</u>                                                            | 551.7529    | 1101.4912  | 1101.5165     | -0.0252              | 0    | 41    | 0.018    | 1    | K.QFAEMVYAK.F + Oxidation (M)     |  |
|    |     | <u>27</u>                                                            | 554.3174    | 1106.6202  | 1106.6336     | -0.0133              | 0    | 78    | 4.2e-006 | 1    | R.VFSGLVSTGLK.V                   |  |
|    |     | <u>31</u>                                                            | 562.2753    | 1122.5360  | 1122.5591     | -0.0230              | 0    | 65    | 6.6e-005 | 1    | K.STLTDSLCK.A                     |  |
|    |     | <u>52</u>                                                            | 604.7434    | 1207.4722  | 1207.4961     | -0.0239              | 0    | 49    | 0.0025   | 1    | K.EGALCEENMR.G                    |  |
|    |     | <u>65</u>                                                            | 451.2427    | 1350.7063  | 1350.7507     | -0.0444              | 1    | 66    | 5.2e-005 | 1    | R.VAVEAKNPADLPK.L                 |  |
|    |     | <u>68</u>                                                            | 689.8553    | 1377.6960  | 1377.7075     | -0.0114              | 0    | 71    | 1.9e-005 | 1    | R.CLYASVLTAPR.L                   |  |
|    |     | <u>73</u>                                                            | 468.2597    | 1401.7573  | 1401.7980     | -0.0407              | 1    | 63    | 0.00011  | 1    | K.KEDLYLKPQIR.T                   |  |
|    |     | <u>78</u>                                                            | 477.5694    | 1429.6864  | 1429.7314     | -0.0450              | 1    | 58    | 0.00032  | 1    | K.FAAKGEGQLGPAER.A                |  |
|    |     | <u>86</u>                                                            | 797.8822    | 1593.7498  | 1593.7556     | -0.0057              | 0    | 64    | 7.1e-005 | 1    | R.ETVSESNVLCCLK.S                 |  |
|    |     | <u>87</u>                                                            | 544.5774    | 1630.7104  | 1630.7522     | -0.0418              | 0    | 63    | 0.0001   | 1    | K.TGTTTTFEHAHMR.V + Oxidation (M) |  |

## N° in Table S1 N° spot protein identification

| 59        | 116      | Leucine-rich PPR motif-containing protein                            |              |            |              |                      |        |      |                |  |  |  |
|-----------|----------|----------------------------------------------------------------------|--------------|------------|--------------|----------------------|--------|------|----------------|--|--|--|
| 59        | 1.       | AAA67549                                                             | Mass: 146306 | Score: 136 | Coverage: 4% | number of peptides : |        | 5    |                |  |  |  |
|           |          | HUM130LEU NID: - Homo sapiens                                        |              |            |              |                      |        |      |                |  |  |  |
|           |          | Check to include this hit in error tolerant search or archive report |              |            |              |                      |        |      |                |  |  |  |
| Query     | Observed | Mr(expt)                                                             | Mr(calc)     | Delta      | Miss         | Score                | Expect | Rank | Peptide        |  |  |  |
| <u>15</u> | 549.3336 | 1096.6526                                                            | 1096.5876    | 0.0650     | 0            | 33                   | 0.096  | 1    | K.IQEENVIPR.E  |  |  |  |
| <u>23</u> | 636.8671 | 1271.7196                                                            | 1271.6470    | 0.0727     | 0            | 60                   | 0.0002 | 1    | K.TVLDQQQTPSRL |  |  |  |

Table S2A

|    |          |           |           |        |   |    |          |   |                  |
|----|----------|-----------|-----------|--------|---|----|----------|---|------------------|
| 24 | 657.3735 | 1312.7324 | 1312.6510 | 0.0814 | 1 | 60 | 0.00023  | 1 | K.SYVSEKDVTSAK.A |
| 28 | 458.2872 | 1371.8398 | 1371.7609 | 0.0788 | 1 | 35 | 0.071    | 1 | K.LVKEGETDLQK.A  |
| 31 | 702.8856 | 1403.7566 | 1403.6715 | 0.0852 | 0 | 69 | 2.8e-005 | 1 | R.CVANNQVETLEK.L |

## N° in Table S1 N° spot protein identification

| 60                                                                                                                           | 859      | C-terminal binding protein 2<br>Q5SQP7_HUMAN Mass: 106748 Score: 193 Coverage: 4% |           |         |      |       |          | number of peptides : | 5                             |
|------------------------------------------------------------------------------------------------------------------------------|----------|-----------------------------------------------------------------------------------|-----------|---------|------|-------|----------|----------------------|-------------------------------|
| C-terminal binding protein 2 - Homo sapiens (Human).<br>Check to include this hit in error tolerant search or archive report |          |                                                                                   |           |         |      |       |          |                      |                               |
| Query                                                                                                                        | Observed | Mr(expt)                                                                          | Mr(calc)  | Delta   | Miss | Score | Expect   | Rank                 | Peptide                       |
| 6                                                                                                                            | 479.7773 | 957.5400                                                                          | 957.5243  | 0.0157  | 0    | 50    | 0.0025   | 1                    | R.VQSQVEQJRE                  |
| 8                                                                                                                            | 508.7689 | 1015.5232                                                                         | 1015.5410 | -0.0178 | 1    | 42    | 0.016    | 1                    | R.EAAATEIRR.A                 |
| 10                                                                                                                           | 523.7810 | 1045.5474                                                                         | 1045.5669 | -0.0194 | 0    | 62    | 0.00017  | 1                    | R.QGAFLVNAAR.G                |
| 13                                                                                                                           | 590.7838 | 1179.5530                                                                         | 1179.5772 | -0.0241 | 0    | 93    | 1.1e-007 | 1                    | R.IGSGYDNDVIK.A               |
| 16                                                                                                                           | 611.2844 | 1220.5542                                                                         | 1220.5781 | -0.0238 | 0    | 28    | 0.4      | 1                    | R.DCTVEMPIK.D + Oxidation (M) |

## N° in Table S1 N° spot protein identification

| 61                                                                                                                                                                                               | 303          | N-ras upstream protein NRU           |           |         |      |       |         |                      |                                   |
|--------------------------------------------------------------------------------------------------------------------------------------------------------------------------------------------------|--------------|--------------------------------------|-----------|---------|------|-------|---------|----------------------|-----------------------------------|
| 1.                                                                                                                                                                                               | Q9GZV0_HUMAN | Mass: 86418 Score: 270 Coverage: 19% |           |         |      |       |         | number of peptides : | 14                                |
| Hypothetical protein FLJ12466 (Hypothetical protein FLJ12454).- Homo sapiens (Human). N-ras upstream protein NRU - human<br>Check to include this hit in error tolerant search or archive report |              |                                      |           |         |      |       |         |                      |                                   |
| Query                                                                                                                                                                                            | Observed     | Mr(expt)                             | Mr(calc)  | Delta   | Miss | Score | Expect  | Rank                 | Peptide                           |
| 10                                                                                                                                                                                               | 476.7649     | 951.5152                             | 951.5250  | -0.0097 | 0    | 30    | 0.24    | 1                    | K.AVAAPRPDR.L                     |
| 16                                                                                                                                                                                               | 526.7169     | 1051.4192                            | 1051.4328 | -0.0135 | 0    | 49    | 0.0029  | 1                    | K.CSACNVWR.V                      |
| 18                                                                                                                                                                                               | 526.7327     | 1051.4508                            | 1051.4613 | -0.0105 | 0    | 25    | 0.67    | 1                    | R.CQGVVCAK.E                      |
| 22                                                                                                                                                                                               | 569.8106     | 1137.6066                            | 1137.6142 | -0.0076 | 0    | 42    | 0.014   | 1                    | K.VTLLEGDHVR.F                    |
| 23                                                                                                                                                                                               | 575.2873     | 1148.5600                            | 1148.5713 | -0.0113 | 1    | 27    | 0.43    | 1                    | K.ELPFGDKDTK.S                    |
| 24                                                                                                                                                                                               | 586.7928     | 1171.5710                            | 1171.5833 | -0.0123 | 0    | 41    | 0.016   | 1                    | K.NITLDDASAPR.L                   |
| 28                                                                                                                                                                                               | 627.2589     | 1252.5032                            | 1252.5143 | -0.0110 | 0    | 54    | 0.00073 | 1                    | R.GPDNSMGFGAER.K + Oxidation (M)  |
| 30                                                                                                                                                                                               | 627.8499     | 1253.6852                            | 1253.6979 | -0.0127 | 1    | 41    | 0.017   | 1                    | K.IKQELPEER.M                     |
| 31                                                                                                                                                                                               | 451.9132     | 1352.7178                            | 1352.7412 | -0.0234 | 1    | 61    | 0.00014 | 1                    | K.SKVTLLEGDHVR.F                  |
| 33                                                                                                                                                                                               | 456.2045     | 1365.5917                            | 1365.6174 | -0.0258 | 0    | 53    | 0.0011  | 1                    | K.GTVSFHSHSDHR.F                  |
| 34                                                                                                                                                                                               | 461.2013     | 1380.5821                            | 1380.6092 | -0.0271 | 1    | 27    | 0.41    | 1                    | R.GPDNSMGFGAERK.I + Oxidation (M) |
| 37                                                                                                                                                                                               | 467.2358     | 1398.6856                            | 1398.7150 | -0.0295 | 0    | 46    | 0.0051  | 1                    | K.QRPGQVATCVR.L                   |
| 39                                                                                                                                                                                               | 474.5777     | 1420.7113                            | 1420.7423 | -0.0310 | 1    | 34    | 0.082   | 1                    | K.VPSKNQNDPLPGR.I                 |
| 41                                                                                                                                                                                               | 537.2435     | 1608.7087                            | 1608.7380 | -0.0293 | 1    | 49    | 0.0021  | 1                    | K.VGDDVEFEVSSDRR.T                |

## N° in Table S1 N° spot protein identification

| 62                                                                                                                                                                                               | 300          | N-ras upstream protein NRU           |           |        |      |       |          |                      |                                  |
|--------------------------------------------------------------------------------------------------------------------------------------------------------------------------------------------------|--------------|--------------------------------------|-----------|--------|------|-------|----------|----------------------|----------------------------------|
| 1.                                                                                                                                                                                               | Q9GZV0_HUMAN | Mass: 86418 Score: 140 Coverage: 10% |           |        |      |       |          | number of peptides : | 7                                |
| Hypothetical protein FLJ12466 (Hypothetical protein FLJ12454).- Homo sapiens (Human). N-ras upstream protein NRU - human<br>Check to include this hit in error tolerant search or archive report |              |                                      |           |        |      |       |          |                      |                                  |
| Query                                                                                                                                                                                            | Observed     | Mr(expt)                             | Mr(calc)  | Delta  | Miss | Score | Expect   | Rank                 | Peptide                          |
| 10                                                                                                                                                                                               | 505.8006     | 1009.5866                            | 1009.4941 | 0.0926 | 0    | 35    | 0.058    | 1                    | K.NQNDPLPGR.I                    |
| 13                                                                                                                                                                                               | 526.7648     | 1051.5150                            | 1051.4328 | 0.0823 | 0    | 48    | 0.0034   | 1                    | K.CSACNVWR.V                     |
| 14                                                                                                                                                                                               | 526.7849     | 1051.5552                            | 1051.4613 | 0.0939 | 0    | 29    | 0.23     | 1                    | R.CQGVVCAK.E                     |
| 17                                                                                                                                                                                               | 569.8644     | 1137.7142                            | 1137.6142 | 0.1000 | 0    | 42    | 0.012    | 1                    | K.VTLLEGDHVR.F                   |
| 18                                                                                                                                                                                               | 575.3450     | 1148.6754                            | 1148.5713 | 0.1041 | 1    | 26    | 0.64     | 1                    | K.ELPFGDKDTK.S                   |
| 19                                                                                                                                                                                               | 586.8484     | 1171.6822                            | 1171.5833 | 0.0989 | 0    | 34    | 0.083    | 1                    | K.NITLDDASAPR.L                  |
| 24                                                                                                                                                                                               | 627.3198     | 1252.6250                            | 1252.5143 | 0.1108 | 0    | 66    | 5.5e-005 | 1                    | R.GPDNSMGFGAER.K + Oxidation (M) |

## N° in Table S1 N° spot protein identification

| 63                                                                                                                                                                                               | 304          | N-ras upstream protein NRU           |           |        |      |       |         |                      |                |
|--------------------------------------------------------------------------------------------------------------------------------------------------------------------------------------------------|--------------|--------------------------------------|-----------|--------|------|-------|---------|----------------------|----------------|
| 1.                                                                                                                                                                                               | Q9GZV0_HUMAN | Mass: 86418 Score: 375 Coverage: 13% |           |        |      |       |         | number of peptides : | 12             |
| Hypothetical protein FLJ12466 (Hypothetical protein FLJ12454).- Homo sapiens (Human). N-ras upstream protein NRU - human<br>Check to include this hit in error tolerant search or archive report |              |                                      |           |        |      |       |         |                      |                |
| Query                                                                                                                                                                                            | Observed     | Mr(expt)                             | Mr(calc)  | Delta  | Miss | Score | Expect  | Rank                 | Peptide        |
| 9                                                                                                                                                                                                | 476.8052     | 951.5958                             | 951.5250  | 0.0709 | 0    | 27    | 0.39    | 1                    | K.AVAAPRPDR.L  |
| 10                                                                                                                                                                                               | 489.2808     | 976.5470                             | 976.4834  | 0.0637 | 0    | 37    | 0.062   | 1                    | R.EMGVIAAMR.D  |
| 13                                                                                                                                                                                               | 505.7878     | 1009.5610                            | 1009.4941 | 0.0670 | 0    | 34    | 0.078   | 1                    | K.NQNDPLPGR.I  |
| 16                                                                                                                                                                                               | 526.7562     | 1051.4978                            | 1051.4328 | 0.0651 | 0    | 48    | 0.0034  | 1                    | K.CSACNVWR.V   |
| 17                                                                                                                                                                                               | 526.7716     | 1051.5286                            | 1051.4613 | 0.0673 | 0    | 28    | 0.34    | 1                    | R.CQGVVCAK.E   |
| 19                                                                                                                                                                                               | 569.8522     | 1137.6898                            | 1137.6142 | 0.0756 | 0    | 58    | 0.00035 | 1                    | K.VTLLEGDHVR.F |

Table S2A

|           |          |           |           |        |   |    |          |   |                                    |
|-----------|----------|-----------|-----------|--------|---|----|----------|---|------------------------------------|
| <u>20</u> | 575.3294 | 1148.6442 | 1148.5713 | 0.0729 | 1 | 47 | 0.0044   | 1 | K.ELPFGDKDTK.S                     |
| <u>22</u> | 586.8357 | 1171.6568 | 1171.5833 | 0.0736 | 0 | 32 | 0.15     | 1 | K.NITLDDASAPR.L                    |
| 26        | 627.3074 | 1252.6002 | 1252.5143 | 0.0860 | 0 | 86 | 5.6e-007 | 1 | R.GPDNSMGFGAER.K + Oxidation (M)   |
| <u>29</u> | 456.2413 | 1365.7021 | 1365.6174 | 0.0846 | 0 | 72 | 1.2e-005 | 1 | K.GTVSFHSHSDHR.F                   |
| <u>30</u> | 461.2357 | 1380.6853 | 1380.6092 | 0.0761 | 1 | 45 | 0.006    | 1 | R.GPDNSMGFGAER.K.I + Oxidation (M) |
| <u>34</u> | 474.6168 | 1420.8286 | 1420.7423 | 0.0863 | 1 | 44 | 0.0076   | 1 | K.VPSKNQNDPLPGR.I                  |

---

**N° in Table S1 N° spot protein identification**


---

|                                                                                                                                           |                                                    |                                            |                 |                      |              |             |              |               |             |                                   |
|-------------------------------------------------------------------------------------------------------------------------------------------|----------------------------------------------------|--------------------------------------------|-----------------|----------------------|--------------|-------------|--------------|---------------|-------------|-----------------------------------|
| 64                                                                                                                                        | 746                                                | Heterogeneous nuclear ribonucleoprotein K. |                 |                      |              |             |              |               |             |                                   |
| 1.                                                                                                                                        | Q5T6W5 HUMAN Mass: 47756 Score: 459 Coverage: 22 % |                                            |                 | number of peptides : |              |             | 10           |               |             |                                   |
| Heterogeneous nuclear ribonucleoprotein K.- Homo sapiens (Human).<br>Check to include this hit in error tolerant search or archive report |                                                    |                                            |                 |                      |              |             |              |               |             |                                   |
|                                                                                                                                           | <u>Query</u>                                       | <u>Observed</u>                            | <u>Mr(expt)</u> | <u>Mr(calc)</u>      | <u>Delta</u> | <u>Miss</u> | <u>Score</u> | <u>Expect</u> | <u>Rank</u> | <u>Peptide</u>                    |
|                                                                                                                                           | 9                                                  | 507.2446                                   | 1012.4746       | 1012.4284            | 0.0463       | 0           | 55           | 0.00068       | 1           | R.GGDLMAYDR.R + Oxidation (M)     |
|                                                                                                                                           | 12                                                 | 507.7201                                   | 1013.4256       | 1013.3760            | 0.0496       | 0           | 34           | 0.095         | 1           | R.DYDDMSPR.R + Oxidation (M)      |
|                                                                                                                                           | <u>14</u>                                          | 527.3482                                   | 1052.6818       | 1052.6342            | 0.0476       | 0           | 38           | 0.039         | 1           | R.VVLGGKPR.V                      |
|                                                                                                                                           | <u>20</u>                                          | 549.7581                                   | 1097.5016       | 1097.4448            | 0.0569       | 0           | 48           | 0.0032        | 1           | K.GSDFCCLR.L                      |
|                                                                                                                                           | 21                                                 | 553.7883                                   | 1105.5620       | 1105.5074            | 0.0547       | 0           | 53           | 0.0011        | 1           | R.NTDEMVELR.I                     |
|                                                                                                                                           | <u>32</u>                                          | 597.8840                                   | 1193.7534       | 1193.6921            | 0.0614       | 0           | 51           | 0.0017        | 1           | R.NLPLPPPPR.G                     |
|                                                                                                                                           | <u>35</u>                                          | 630.3201                                   | 1258.6256       | 1258.5677            | 0.0579       | 0           | 84           | 7.4e-007      | 1           | K.IDEPLGSED.R.I                   |
|                                                                                                                                           | 44                                                 | 455.9030                                   | 1364.6872       | 1364.6354            | 0.0518       | 1           | 36           | 0.05          | 1           | R.SRNTDEMVELR.I + Oxidation (M)   |
|                                                                                                                                           | <u>46</u>                                          | 517.2415                                   | 1548.7027       | 1548.6450            | 0.0577       | 0           | 61           | 0.00017       | 1           | K.LFQECPPHSTR.V                   |
|                                                                                                                                           | <u>55</u>                                          | 584.6285                                   | 1750.8637       | 1750.7944            | 0.0693       | 1           | 71           | 1.4e-005      | 1           | K.RPAEDMEEQAFKR.S + Oxidation (M) |

---

**N° in Table S1 N° spot protein identification**


---

|                                                                                                                                                          |                                                |                 |                 |                      |              |             |              |               |             |                    |
|----------------------------------------------------------------------------------------------------------------------------------------------------------|------------------------------------------------|-----------------|-----------------|----------------------|--------------|-------------|--------------|---------------|-------------|--------------------|
| 65                                                                                                                                                       | 283                                            | striatin 3      |                 |                      |              |             |              |               |             |                    |
| 3.                                                                                                                                                       | STRN3 HUMAN Mass: 87478 Score: 89 Coverage: 3% |                 |                 | number of peptides : |              |             | 2            |               |             |                    |
| Striatin 3 (Cell-cycle autoantigen SG2NA) (S/G2 antigen).- Homo sapiens (Human).<br>Check to include this hit in error tolerant search or archive report |                                                |                 |                 |                      |              |             |              |               |             |                    |
|                                                                                                                                                          | <u>Query</u>                                   | <u>Observed</u> | <u>Mr(expt)</u> | <u>Mr(calc)</u>      | <u>Delta</u> | <u>Miss</u> | <u>Score</u> | <u>Expect</u> | <u>Rank</u> | <u>Peptide</u>     |
|                                                                                                                                                          | <u>15</u>                                      | 611.3366        | 1220.6586       | 1220.6401            | 0.0186       | 0           | 49           | 0.0031        | 1           | K.AYIASAGADALAK.V  |
|                                                                                                                                                          | 23                                             | 710.8593        | 1419.7040       | 1419.6776            | 0.0264       | 0           | 63           | 8.9e-005      | 1           | K.NQLLSCSADGTVRL.L |

---

**N° in Table S1 N° spot protein identification**


---

|                                                                                                                |                                             |                                |                 |                      |              |             |              |               |             |                                |
|----------------------------------------------------------------------------------------------------------------|---------------------------------------------|--------------------------------|-----------------|----------------------|--------------|-------------|--------------|---------------|-------------|--------------------------------|
| 66                                                                                                             | 1240                                        | hepatoma-derived growth factor |                 |                      |              |             |              |               |             |                                |
| 1.                                                                                                             | A55055 Mass: 26886 Score: 217 Coverage: 16% |                                |                 | number of peptides : |              |             | 4            |               |             |                                |
| hepatoma-derived growth factor - human<br>Check to include this hit in error tolerant search or archive report |                                             |                                |                 |                      |              |             |              |               |             |                                |
|                                                                                                                | <u>Query</u>                                | <u>Observed</u>                | <u>Mr(expt)</u> | <u>Mr(calc)</u>      | <u>Delta</u> | <u>Miss</u> | <u>Score</u> | <u>Expect</u> | <u>Rank</u> | <u>Peptide</u>                 |
|                                                                                                                | <u>5</u>                                    | 455.2465                       | 908.4784        | 908.4426             | 0.0359       | 0           | 58           | 0.00032       | 1           | K.CGDLVFAK.M                   |
|                                                                                                                | <u>7</u>                                    | 522.7817                       | 1043.5488       | 1043.5135            | 0.0354       | 0           | 87           | 5.4e-007      | 1           | R.AGDLLEDSPK.R                 |
|                                                                                                                | <u>9</u>                                    | 544.7685                       | 1087.5224       | 1087.4894            | 0.0330       | 0           | 30           | 0.27          | 1           | K.NSTPSEPGSGR.G                |
|                                                                                                                | 11                                          | 559.7924                       | 1117.5702       | 1117.5325            | 0.0377       | 0           | 42           | 0.015         | 1           | R.IDEMPEAAVK.S + Oxidation (M) |

---

**N° in Table S1 N° spot protein identification**


---

|                                                                                                      |                                               |                                                            |                 |                      |              |             |              |               |             |                     |
|------------------------------------------------------------------------------------------------------|-----------------------------------------------|------------------------------------------------------------|-----------------|----------------------|--------------|-------------|--------------|---------------|-------------|---------------------|
| 67                                                                                                   | 805                                           | EGF-containing fibulin-like extracellular matrix protein 1 |                 |                      |              |             |              |               |             |                     |
| 1.                                                                                                   | AAH14410 Mass: 56885 Score: 254 Coverage: 15% |                                                            |                 | number of peptides : |              |             | 6            |               |             |                     |
| BCO14410 NID: - Homo sapiens<br>Check to include this hit in error tolerant search or archive report |                                               |                                                            |                 |                      |              |             |              |               |             |                     |
|                                                                                                      | <u>Query</u>                                  | <u>Observed</u>                                            | <u>Mr(expt)</u> | <u>Mr(calc)</u>      | <u>Delta</u> | <u>Miss</u> | <u>Score</u> | <u>Expect</u> | <u>Rank</u> | <u>Peptide</u>      |
|                                                                                                      | <u>9</u>                                      | 538.8165                                                   | 1075.6184       | 1075.5913            | 0.0271       | 0           | 34           | 0.088         | 1           | R.ELPQSVYK.Y        |
|                                                                                                      | <u>10</u>                                     | 544.7917                                                   | 1087.5688       | 1087.5444            | 0.0244       | 0           | 48           | 0.0042        | 1           | R.ADQVCINLR.G       |
|                                                                                                      | 14                                            | 643.3100                                                   | 1284.6054       | 1284.5735            | 0.0320       | 0           | 81           | 1.7e-006      | 1           | K.SGNENGEFYLR.Q     |
|                                                                                                      | <u>15</u>                                     | 662.2857                                                   | 1322.5568       | 1322.5231            | 0.0338       | 0           | 78           | 3.5e-006      | 1           | R.LNCEIDIECR.T      |
|                                                                                                      | <u>16</u>                                     | 677.2996                                                   | 1352.5846       | 1352.5458            | 0.0389       | 0           | 52           | 0.0013        | 1           | R.CVCPVSNAMCRLE     |
|                                                                                                      | <u>22</u>                                     | 562.6321                                                   | 1684.8745       | 1684.8393            | 0.0351       | 1           | 83           | 8.5e-007      | 1           | R.NPADPQRIPSNPSHR.I |

---

**N° in Table S1 N° spot protein identification**


---

|    |             |
|----|-------------|
| 68 | see on N°8  |
| 69 | see on N°39 |

Table S2B. LC-MS MS data on proteins for which only one peptide was identified.

| N° in Table S1 | N° spot    | protein identification                                                                                                                                                                                                                                                                                                                                                                                                                                                                                                                                                                                                                                                                                                                                                                                                                                                                                                                                                                                                                                                                                                                                                                                                                                                                                                                                                                                                                                                                                                                                                                                                                                                                                                                                                                                                                                                                                                                                                                                                                                                          | number of peptides : |          |          |          |          |      |                               |        |      |         |          |          |           |           |         |   |    |         |   |                   |           |          |           |           |         |   |    |         |   |              |           |          |           |           |         |   |    |         |   |                |           |          |           |           |         |   |    |        |   |                               |           |          |           |           |         |   |    |          |   |                   |           |          |           |           |         |   |     |          |   |                               |           |          |           |           |         |   |    |       |   |                 |           |          |           |           |         |   |    |         |   |               |           |          |           |           |         |   |    |          |   |                 |           |          |           |           |         |   |    |        |   |                 |  |
|----------------|------------|---------------------------------------------------------------------------------------------------------------------------------------------------------------------------------------------------------------------------------------------------------------------------------------------------------------------------------------------------------------------------------------------------------------------------------------------------------------------------------------------------------------------------------------------------------------------------------------------------------------------------------------------------------------------------------------------------------------------------------------------------------------------------------------------------------------------------------------------------------------------------------------------------------------------------------------------------------------------------------------------------------------------------------------------------------------------------------------------------------------------------------------------------------------------------------------------------------------------------------------------------------------------------------------------------------------------------------------------------------------------------------------------------------------------------------------------------------------------------------------------------------------------------------------------------------------------------------------------------------------------------------------------------------------------------------------------------------------------------------------------------------------------------------------------------------------------------------------------------------------------------------------------------------------------------------------------------------------------------------------------------------------------------------------------------------------------------------|----------------------|----------|----------|----------|----------|------|-------------------------------|--------|------|---------|----------|----------|-----------|-----------|---------|---|----|---------|---|-------------------|-----------|----------|-----------|-----------|---------|---|----|---------|---|--------------|-----------|----------|-----------|-----------|---------|---|----|---------|---|----------------|-----------|----------|-----------|-----------|---------|---|----|--------|---|-------------------------------|-----------|----------|-----------|-----------|---------|---|----|----------|---|-------------------|-----------|----------|-----------|-----------|---------|---|-----|----------|---|-------------------------------|-----------|----------|-----------|-----------|---------|---|----|-------|---|-----------------|-----------|----------|-----------|-----------|---------|---|----|---------|---|---------------|-----------|----------|-----------|-----------|---------|---|----|----------|---|-----------------|-----------|----------|-----------|-----------|---------|---|----|--------|---|-----------------|--|
| 7              | 740        | dihydropyrimidinase-related protein 2<br>JCB5317 _____ Mass: 62711 Score: 41 Coverage: 1%<br>dihydropyrimidinase-related protein 2 - human<br>Check to include this hit in error tolerant search or archive report                                                                                                                                                                                                                                                                                                                                                                                                                                                                                                                                                                                                                                                                                                                                                                                                                                                                                                                                                                                                                                                                                                                                                                                                                                                                                                                                                                                                                                                                                                                                                                                                                                                                                                                                                                                                                                                              | 1                    |          |          |          |          |      |                               |        |      |         |          |          |           |           |         |   |    |         |   |                   |           |          |           |           |         |   |    |         |   |              |           |          |           |           |         |   |    |         |   |                |           |          |           |           |         |   |    |        |   |                               |           |          |           |           |         |   |    |          |   |                   |           |          |           |           |         |   |     |          |   |                               |           |          |           |           |         |   |    |       |   |                 |           |          |           |           |         |   |    |         |   |               |           |          |           |           |         |   |    |          |   |                 |           |          |           |           |         |   |    |        |   |                 |  |
|                |            | <table border="1"> <thead> <tr> <th>Query</th> <th>Observed</th> <th>Mr(expt)</th> <th>Mr(calc)</th> <th>Delta</th> <th>Miss</th> <th>Score</th> <th>Expect</th> <th>Rank</th> <th>Peptide</th> </tr> </thead> <tbody> <tr> <td><u>3</u></td> <td>516.3078</td> <td>1030.6010</td> <td>1030.5407</td> <td>0.0604</td> <td>0</td> <td>41</td> <td>0,019</td> <td>1</td> <td>K.SSAEIVIAQAR.K</td> </tr> </tbody> </table>                                                                                                                                                                                                                                                                                                                                                                                                                                                                                                                                                                                                                                                                                                                                                                                                                                                                                                                                                                                                                                                                                                                                                                                                                                                                                                                                                                                                                                                                                                                                                                                                                                                         | Query                | Observed | Mr(expt) | Mr(calc) | Delta    | Miss | Score                         | Expect | Rank | Peptide | <u>3</u> | 516.3078 | 1030.6010 | 1030.5407 | 0.0604  | 0 | 41 | 0,019   | 1 | K.SSAEIVIAQAR.K   |           |          |           |           |         |   |    |         |   |              |           |          |           |           |         |   |    |         |   |                |           |          |           |           |         |   |    |        |   |                               |           |          |           |           |         |   |    |          |   |                   |           |          |           |           |         |   |     |          |   |                               |           |          |           |           |         |   |    |       |   |                 |           |          |           |           |         |   |    |         |   |               |           |          |           |           |         |   |    |          |   |                 |           |          |           |           |         |   |    |        |   |                 |  |
| Query          | Observed   | Mr(expt)                                                                                                                                                                                                                                                                                                                                                                                                                                                                                                                                                                                                                                                                                                                                                                                                                                                                                                                                                                                                                                                                                                                                                                                                                                                                                                                                                                                                                                                                                                                                                                                                                                                                                                                                                                                                                                                                                                                                                                                                                                                                        | Mr(calc)             | Delta    | Miss     | Score    | Expect   | Rank | Peptide                       |        |      |         |          |          |           |           |         |   |    |         |   |                   |           |          |           |           |         |   |    |         |   |              |           |          |           |           |         |   |    |         |   |                |           |          |           |           |         |   |    |        |   |                               |           |          |           |           |         |   |    |          |   |                   |           |          |           |           |         |   |     |          |   |                               |           |          |           |           |         |   |    |       |   |                 |           |          |           |           |         |   |    |         |   |               |           |          |           |           |         |   |    |          |   |                 |           |          |           |           |         |   |    |        |   |                 |  |
| <u>3</u>       | 516.3078   | 1030.6010                                                                                                                                                                                                                                                                                                                                                                                                                                                                                                                                                                                                                                                                                                                                                                                                                                                                                                                                                                                                                                                                                                                                                                                                                                                                                                                                                                                                                                                                                                                                                                                                                                                                                                                                                                                                                                                                                                                                                                                                                                                                       | 1030.5407            | 0.0604   | 0        | 41       | 0,019    | 1    | K.SSAEIVIAQAR.K               |        |      |         |          |          |           |           |         |   |    |         |   |                   |           |          |           |           |         |   |    |         |   |              |           |          |           |           |         |   |    |         |   |                |           |          |           |           |         |   |    |        |   |                               |           |          |           |           |         |   |    |          |   |                   |           |          |           |           |         |   |     |          |   |                               |           |          |           |           |         |   |    |       |   |                 |           |          |           |           |         |   |    |         |   |               |           |          |           |           |         |   |    |          |   |                 |           |          |           |           |         |   |    |        |   |                 |  |
| 29             | 418        | Coronin-7<br>BAB15211 _____ Mass: 101596 Score: 59 Queries matched: 1<br>AK025674 NID: - Homo sapiens (Coronin-7)<br>Check to include this hit in error tolerant search or archive report                                                                                                                                                                                                                                                                                                                                                                                                                                                                                                                                                                                                                                                                                                                                                                                                                                                                                                                                                                                                                                                                                                                                                                                                                                                                                                                                                                                                                                                                                                                                                                                                                                                                                                                                                                                                                                                                                       | 1                    |          |          |          |          |      |                               |        |      |         |          |          |           |           |         |   |    |         |   |                   |           |          |           |           |         |   |    |         |   |              |           |          |           |           |         |   |    |         |   |                |           |          |           |           |         |   |    |        |   |                               |           |          |           |           |         |   |    |          |   |                   |           |          |           |           |         |   |     |          |   |                               |           |          |           |           |         |   |    |       |   |                 |           |          |           |           |         |   |    |         |   |               |           |          |           |           |         |   |    |          |   |                 |           |          |           |           |         |   |    |        |   |                 |  |
|                |            | <table border="1"> <thead> <tr> <th>Query</th> <th>Observed</th> <th>Mr(expt)</th> <th>Mr(calc)</th> <th>Delta</th> <th>Miss</th> <th>Score</th> <th>Expect</th> <th>Rank</th> <th>Peptide</th> </tr> </thead> <tbody> <tr> <td><u>5</u></td> <td>646.8463</td> <td>1291.6780</td> <td>1291.6408</td> <td>0.0373</td> <td>0</td> <td>59</td> <td>0.00049</td> <td>1</td> <td>R.SGPEPLQEGPGPK.G</td> </tr> </tbody> </table>                                                                                                                                                                                                                                                                                                                                                                                                                                                                                                                                                                                                                                                                                                                                                                                                                                                                                                                                                                                                                                                                                                                                                                                                                                                                                                                                                                                                                                                                                                                                                                                                                                                     | Query                | Observed | Mr(expt) | Mr(calc) | Delta    | Miss | Score                         | Expect | Rank | Peptide | <u>5</u> | 646.8463 | 1291.6780 | 1291.6408 | 0.0373  | 0 | 59 | 0.00049 | 1 | R.SGPEPLQEGPGPK.G |           |          |           |           |         |   |    |         |   |              |           |          |           |           |         |   |    |         |   |                |           |          |           |           |         |   |    |        |   |                               |           |          |           |           |         |   |    |          |   |                   |           |          |           |           |         |   |     |          |   |                               |           |          |           |           |         |   |    |       |   |                 |           |          |           |           |         |   |    |         |   |               |           |          |           |           |         |   |    |          |   |                 |           |          |           |           |         |   |    |        |   |                 |  |
| Query          | Observed   | Mr(expt)                                                                                                                                                                                                                                                                                                                                                                                                                                                                                                                                                                                                                                                                                                                                                                                                                                                                                                                                                                                                                                                                                                                                                                                                                                                                                                                                                                                                                                                                                                                                                                                                                                                                                                                                                                                                                                                                                                                                                                                                                                                                        | Mr(calc)             | Delta    | Miss     | Score    | Expect   | Rank | Peptide                       |        |      |         |          |          |           |           |         |   |    |         |   |                   |           |          |           |           |         |   |    |         |   |              |           |          |           |           |         |   |    |         |   |                |           |          |           |           |         |   |    |        |   |                               |           |          |           |           |         |   |    |          |   |                   |           |          |           |           |         |   |     |          |   |                               |           |          |           |           |         |   |    |       |   |                 |           |          |           |           |         |   |    |         |   |               |           |          |           |           |         |   |    |          |   |                 |           |          |           |           |         |   |    |        |   |                 |  |
| <u>5</u>       | 646.8463   | 1291.6780                                                                                                                                                                                                                                                                                                                                                                                                                                                                                                                                                                                                                                                                                                                                                                                                                                                                                                                                                                                                                                                                                                                                                                                                                                                                                                                                                                                                                                                                                                                                                                                                                                                                                                                                                                                                                                                                                                                                                                                                                                                                       | 1291.6408            | 0.0373   | 0        | 59       | 0.00049  | 1    | R.SGPEPLQEGPGPK.G             |        |      |         |          |          |           |           |         |   |    |         |   |                   |           |          |           |           |         |   |    |         |   |              |           |          |           |           |         |   |    |         |   |                |           |          |           |           |         |   |    |        |   |                               |           |          |           |           |         |   |    |          |   |                   |           |          |           |           |         |   |     |          |   |                               |           |          |           |           |         |   |    |       |   |                 |           |          |           |           |         |   |    |         |   |               |           |          |           |           |         |   |    |          |   |                 |           |          |           |           |         |   |    |        |   |                 |  |
| 34             | 1480<br>1. | glutathione S transferase P<br>GTP_HUMAN _____ Mass: 23438 Score: 55 Coverage: 4%<br>Glutathione S-transferase P (EC 2.5.1.18) (GST class-pi) (GSTP1-1).- Homo sapiens (Human).<br>Check to include this hit in error tolerant search or archive report                                                                                                                                                                                                                                                                                                                                                                                                                                                                                                                                                                                                                                                                                                                                                                                                                                                                                                                                                                                                                                                                                                                                                                                                                                                                                                                                                                                                                                                                                                                                                                                                                                                                                                                                                                                                                         | 1                    |          |          |          |          |      |                               |        |      |         |          |          |           |           |         |   |    |         |   |                   |           |          |           |           |         |   |    |         |   |              |           |          |           |           |         |   |    |         |   |                |           |          |           |           |         |   |    |        |   |                               |           |          |           |           |         |   |    |          |   |                   |           |          |           |           |         |   |     |          |   |                               |           |          |           |           |         |   |    |       |   |                 |           |          |           |           |         |   |    |         |   |               |           |          |           |           |         |   |    |          |   |                 |           |          |           |           |         |   |    |        |   |                 |  |
|                |            | <table border="1"> <thead> <tr> <th>Query</th> <th>Observed</th> <th>Mr(expt)</th> <th>Mr(calc)</th> <th>Delta</th> <th>Miss</th> <th>Score</th> <th>Expect</th> <th>Rank</th> <th>Peptide</th> </tr> </thead> <tbody> <tr> <td><u>4</u></td> <td>568.8204</td> <td>1135.6262</td> <td>1135.5696</td> <td>0.0567</td> <td>0</td> <td>55</td> <td>0.00076</td> <td>1</td> <td>K.ASCLYGLPLKF</td> </tr> </tbody> </table>                                                                                                                                                                                                                                                                                                                                                                                                                                                                                                                                                                                                                                                                                                                                                                                                                                                                                                                                                                                                                                                                                                                                                                                                                                                                                                                                                                                                                                                                                                                                                                                                                                                         | Query                | Observed | Mr(expt) | Mr(calc) | Delta    | Miss | Score                         | Expect | Rank | Peptide | <u>4</u> | 568.8204 | 1135.6262 | 1135.5696 | 0.0567  | 0 | 55 | 0.00076 | 1 | K.ASCLYGLPLKF     |           |          |           |           |         |   |    |         |   |              |           |          |           |           |         |   |    |         |   |                |           |          |           |           |         |   |    |        |   |                               |           |          |           |           |         |   |    |          |   |                   |           |          |           |           |         |   |     |          |   |                               |           |          |           |           |         |   |    |       |   |                 |           |          |           |           |         |   |    |         |   |               |           |          |           |           |         |   |    |          |   |                 |           |          |           |           |         |   |    |        |   |                 |  |
| Query          | Observed   | Mr(expt)                                                                                                                                                                                                                                                                                                                                                                                                                                                                                                                                                                                                                                                                                                                                                                                                                                                                                                                                                                                                                                                                                                                                                                                                                                                                                                                                                                                                                                                                                                                                                                                                                                                                                                                                                                                                                                                                                                                                                                                                                                                                        | Mr(calc)             | Delta    | Miss     | Score    | Expect   | Rank | Peptide                       |        |      |         |          |          |           |           |         |   |    |         |   |                   |           |          |           |           |         |   |    |         |   |              |           |          |           |           |         |   |    |         |   |                |           |          |           |           |         |   |    |        |   |                               |           |          |           |           |         |   |    |          |   |                   |           |          |           |           |         |   |     |          |   |                               |           |          |           |           |         |   |    |       |   |                 |           |          |           |           |         |   |    |         |   |               |           |          |           |           |         |   |    |          |   |                 |           |          |           |           |         |   |    |        |   |                 |  |
| <u>4</u>       | 568.8204   | 1135.6262                                                                                                                                                                                                                                                                                                                                                                                                                                                                                                                                                                                                                                                                                                                                                                                                                                                                                                                                                                                                                                                                                                                                                                                                                                                                                                                                                                                                                                                                                                                                                                                                                                                                                                                                                                                                                                                                                                                                                                                                                                                                       | 1135.5696            | 0.0567   | 0        | 55       | 0.00076  | 1    | K.ASCLYGLPLKF                 |        |      |         |          |          |           |           |         |   |    |         |   |                   |           |          |           |           |         |   |    |         |   |              |           |          |           |           |         |   |    |         |   |                |           |          |           |           |         |   |    |        |   |                               |           |          |           |           |         |   |    |          |   |                   |           |          |           |           |         |   |     |          |   |                               |           |          |           |           |         |   |    |       |   |                 |           |          |           |           |         |   |    |         |   |               |           |          |           |           |         |   |    |          |   |                 |           |          |           |           |         |   |    |        |   |                 |  |
| 52             | 1277<br>1. | nucleophosmin<br>Q6V962_HUMAN _____ Mass: 32754 Score: 53 Coverage: 3%<br>Nucleophosmin.- Homo sapiens (Human).<br>Check to include this hit in error tolerant search or archive report                                                                                                                                                                                                                                                                                                                                                                                                                                                                                                                                                                                                                                                                                                                                                                                                                                                                                                                                                                                                                                                                                                                                                                                                                                                                                                                                                                                                                                                                                                                                                                                                                                                                                                                                                                                                                                                                                         | 1                    |          |          |          |          |      |                               |        |      |         |          |          |           |           |         |   |    |         |   |                   |           |          |           |           |         |   |    |         |   |              |           |          |           |           |         |   |    |         |   |                |           |          |           |           |         |   |    |        |   |                               |           |          |           |           |         |   |    |          |   |                   |           |          |           |           |         |   |     |          |   |                               |           |          |           |           |         |   |    |       |   |                 |           |          |           |           |         |   |    |         |   |               |           |          |           |           |         |   |    |          |   |                 |           |          |           |           |         |   |    |        |   |                 |  |
|                |            | <table border="1"> <thead> <tr> <th>Query</th> <th>Observed</th> <th>Mr(expt)</th> <th>Mr(calc)</th> <th>Delta</th> <th>Miss</th> <th>Score</th> <th>Expect</th> <th>Rank</th> <th>Peptide</th> </tr> </thead> <tbody> <tr> <td><u>5</u></td> <td>466.2403</td> <td>930.4660</td> <td>930.4658</td> <td>0.0003</td> <td>0</td> <td>53</td> <td>0,0015</td> <td>1</td> <td>K.GPSSVEDIK.A</td> </tr> </tbody> </table>                                                                                                                                                                                                                                                                                                                                                                                                                                                                                                                                                                                                                                                                                                                                                                                                                                                                                                                                                                                                                                                                                                                                                                                                                                                                                                                                                                                                                                                                                                                                                                                                                                                            | Query                | Observed | Mr(expt) | Mr(calc) | Delta    | Miss | Score                         | Expect | Rank | Peptide | <u>5</u> | 466.2403 | 930.4660  | 930.4658  | 0.0003  | 0 | 53 | 0,0015  | 1 | K.GPSSVEDIK.A     |           |          |           |           |         |   |    |         |   |              |           |          |           |           |         |   |    |         |   |                |           |          |           |           |         |   |    |        |   |                               |           |          |           |           |         |   |    |          |   |                   |           |          |           |           |         |   |     |          |   |                               |           |          |           |           |         |   |    |       |   |                 |           |          |           |           |         |   |    |         |   |               |           |          |           |           |         |   |    |          |   |                 |           |          |           |           |         |   |    |        |   |                 |  |
| Query          | Observed   | Mr(expt)                                                                                                                                                                                                                                                                                                                                                                                                                                                                                                                                                                                                                                                                                                                                                                                                                                                                                                                                                                                                                                                                                                                                                                                                                                                                                                                                                                                                                                                                                                                                                                                                                                                                                                                                                                                                                                                                                                                                                                                                                                                                        | Mr(calc)             | Delta    | Miss     | Score    | Expect   | Rank | Peptide                       |        |      |         |          |          |           |           |         |   |    |         |   |                   |           |          |           |           |         |   |    |         |   |              |           |          |           |           |         |   |    |         |   |                |           |          |           |           |         |   |    |        |   |                               |           |          |           |           |         |   |    |          |   |                   |           |          |           |           |         |   |     |          |   |                               |           |          |           |           |         |   |    |       |   |                 |           |          |           |           |         |   |    |         |   |               |           |          |           |           |         |   |    |          |   |                 |           |          |           |           |         |   |    |        |   |                 |  |
| <u>5</u>       | 466.2403   | 930.4660                                                                                                                                                                                                                                                                                                                                                                                                                                                                                                                                                                                                                                                                                                                                                                                                                                                                                                                                                                                                                                                                                                                                                                                                                                                                                                                                                                                                                                                                                                                                                                                                                                                                                                                                                                                                                                                                                                                                                                                                                                                                        | 930.4658             | 0.0003   | 0        | 53       | 0,0015   | 1    | K.GPSSVEDIK.A                 |        |      |         |          |          |           |           |         |   |    |         |   |                   |           |          |           |           |         |   |    |         |   |              |           |          |           |           |         |   |    |         |   |                |           |          |           |           |         |   |    |        |   |                               |           |          |           |           |         |   |    |          |   |                   |           |          |           |           |         |   |     |          |   |                               |           |          |           |           |         |   |    |       |   |                 |           |          |           |           |         |   |    |         |   |               |           |          |           |           |         |   |    |          |   |                 |           |          |           |           |         |   |    |        |   |                 |  |
| 18             | 986        | K1CP_HUMAN _____ Mass: 51447 Score: 223 Coverage: 17%<br>Keratin, type I cytoskeletal 16 (Cytokeratin 16) (K16) (CK 16).- Homo sapiens (Human).<br>Check to include this hit in error tolerant search or archive report                                                                                                                                                                                                                                                                                                                                                                                                                                                                                                                                                                                                                                                                                                                                                                                                                                                                                                                                                                                                                                                                                                                                                                                                                                                                                                                                                                                                                                                                                                                                                                                                                                                                                                                                                                                                                                                         | 10                   |          |          |          |          |      |                               |        |      |         |          |          |           |           |         |   |    |         |   |                   |           |          |           |           |         |   |    |         |   |              |           |          |           |           |         |   |    |         |   |                |           |          |           |           |         |   |    |        |   |                               |           |          |           |           |         |   |    |          |   |                   |           |          |           |           |         |   |     |          |   |                               |           |          |           |           |         |   |    |       |   |                 |           |          |           |           |         |   |    |         |   |               |           |          |           |           |         |   |    |          |   |                 |           |          |           |           |         |   |    |        |   |                 |  |
|                |            | <table border="1"> <thead> <tr> <th>Query</th> <th>Observed</th> <th>Mr(expt)</th> <th>Mr(calc)</th> <th>Delta</th> <th>Miss</th> <th>Score</th> <th>Expect</th> <th>Rank</th> <th>Peptide</th> </tr> </thead> <tbody> <tr> <td><u>1</u></td> <td>404.2005</td> <td>806.3864</td> <td>806.3923</td> <td>-0.0058</td> <td>0</td> <td>40</td> <td>0.029</td> <td>1</td> <td>R.LAADDFR.T</td> </tr> <tr> <td><u>2</u></td> <td>405.2203</td> <td>808.4260</td> <td>808.4330</td> <td>-0.0070</td> <td>0</td> <td>44</td> <td>0.01</td> <td>1</td> <td>R.LASYLDK.V</td> </tr> <tr> <td><u>14</u></td> <td>515.2975</td> <td>1028.5804</td> <td>1028.5866</td> <td>-0.0061</td> <td>0</td> <td>46</td> <td>0.0067</td> <td>1</td> <td>R.VLDELTLAR.T</td> </tr> <tr> <td><u>16</u></td> <td>518.7676</td> <td>1035.5206</td> <td>1035.5250</td> <td>-0.0043</td> <td>1</td> <td>32</td> <td>0.14</td> <td>1</td> <td>K.IRDWYQR.Q</td> </tr> <tr> <td><u>22</u></td> <td>532.8054</td> <td>1063.5962</td> <td>1063.6026</td> <td>-0.0063</td> <td>1</td> <td>28</td> <td>0.37</td> <td>1</td> <td>R.LASYLDKVR.A</td> </tr> <tr> <td><u>25</u></td> <td>553.7610</td> <td>1105.5074</td> <td>1105.5186</td> <td>-0.0112</td> <td>0</td> <td>86</td> <td>6.5e-007</td> <td>1</td> <td>K.VTMQNLNDR.L + Oxidation (M)</td> </tr> <tr> <td><u>26</u></td> <td>553.7827</td> <td>1105.5508</td> <td>1105.5550</td> <td>-0.0041</td> <td>0</td> <td>45</td> <td>0.008</td> <td>1</td> <td>R.ISSVLAGGSCR.A</td> </tr> <tr> <td><u>30</u></td> <td>561.7925</td> <td>1121.5704</td> <td>1121.5717</td> <td>-0.0012</td> <td>0</td> <td>61</td> <td>0.00022</td> <td>1</td> <td>R.LEQEIATYR.R</td> </tr> <tr> <td><u>33</u></td> <td>610.8013</td> <td>1219.5880</td> <td>1219.5932</td> <td>-0.0051</td> <td>0</td> <td>69</td> <td>3.2e-005</td> <td>1</td> <td>K.ASLENSLEETK.G</td> </tr> <tr> <td><u>39</u></td> <td>630.7877</td> <td>1259.5608</td> <td>1259.5630</td> <td>-0.0021</td> <td>0</td> <td>46</td> <td>0.0057</td> <td>1</td> <td>R.EVFTSSSSSSR.Q</td> </tr> </tbody> </table> | Query                | Observed | Mr(expt) | Mr(calc) | Delta    | Miss | Score                         | Expect | Rank | Peptide | <u>1</u> | 404.2005 | 806.3864  | 806.3923  | -0.0058 | 0 | 40 | 0.029   | 1 | R.LAADDFR.T       | <u>2</u>  | 405.2203 | 808.4260  | 808.4330  | -0.0070 | 0 | 44 | 0.01    | 1 | R.LASYLDK.V  | <u>14</u> | 515.2975 | 1028.5804 | 1028.5866 | -0.0061 | 0 | 46 | 0.0067  | 1 | R.VLDELTLAR.T  | <u>16</u> | 518.7676 | 1035.5206 | 1035.5250 | -0.0043 | 1 | 32 | 0.14   | 1 | K.IRDWYQR.Q                   | <u>22</u> | 532.8054 | 1063.5962 | 1063.6026 | -0.0063 | 1 | 28 | 0.37     | 1 | R.LASYLDKVR.A     | <u>25</u> | 553.7610 | 1105.5074 | 1105.5186 | -0.0112 | 0 | 86  | 6.5e-007 | 1 | K.VTMQNLNDR.L + Oxidation (M) | <u>26</u> | 553.7827 | 1105.5508 | 1105.5550 | -0.0041 | 0 | 45 | 0.008 | 1 | R.ISSVLAGGSCR.A | <u>30</u> | 561.7925 | 1121.5704 | 1121.5717 | -0.0012 | 0 | 61 | 0.00022 | 1 | R.LEQEIATYR.R | <u>33</u> | 610.8013 | 1219.5880 | 1219.5932 | -0.0051 | 0 | 69 | 3.2e-005 | 1 | K.ASLENSLEETK.G | <u>39</u> | 630.7877 | 1259.5608 | 1259.5630 | -0.0021 | 0 | 46 | 0.0057 | 1 | R.EVFTSSSSSSR.Q |  |
| Query          | Observed   | Mr(expt)                                                                                                                                                                                                                                                                                                                                                                                                                                                                                                                                                                                                                                                                                                                                                                                                                                                                                                                                                                                                                                                                                                                                                                                                                                                                                                                                                                                                                                                                                                                                                                                                                                                                                                                                                                                                                                                                                                                                                                                                                                                                        | Mr(calc)             | Delta    | Miss     | Score    | Expect   | Rank | Peptide                       |        |      |         |          |          |           |           |         |   |    |         |   |                   |           |          |           |           |         |   |    |         |   |              |           |          |           |           |         |   |    |         |   |                |           |          |           |           |         |   |    |        |   |                               |           |          |           |           |         |   |    |          |   |                   |           |          |           |           |         |   |     |          |   |                               |           |          |           |           |         |   |    |       |   |                 |           |          |           |           |         |   |    |         |   |               |           |          |           |           |         |   |    |          |   |                 |           |          |           |           |         |   |    |        |   |                 |  |
| <u>1</u>       | 404.2005   | 806.3864                                                                                                                                                                                                                                                                                                                                                                                                                                                                                                                                                                                                                                                                                                                                                                                                                                                                                                                                                                                                                                                                                                                                                                                                                                                                                                                                                                                                                                                                                                                                                                                                                                                                                                                                                                                                                                                                                                                                                                                                                                                                        | 806.3923             | -0.0058  | 0        | 40       | 0.029    | 1    | R.LAADDFR.T                   |        |      |         |          |          |           |           |         |   |    |         |   |                   |           |          |           |           |         |   |    |         |   |              |           |          |           |           |         |   |    |         |   |                |           |          |           |           |         |   |    |        |   |                               |           |          |           |           |         |   |    |          |   |                   |           |          |           |           |         |   |     |          |   |                               |           |          |           |           |         |   |    |       |   |                 |           |          |           |           |         |   |    |         |   |               |           |          |           |           |         |   |    |          |   |                 |           |          |           |           |         |   |    |        |   |                 |  |
| <u>2</u>       | 405.2203   | 808.4260                                                                                                                                                                                                                                                                                                                                                                                                                                                                                                                                                                                                                                                                                                                                                                                                                                                                                                                                                                                                                                                                                                                                                                                                                                                                                                                                                                                                                                                                                                                                                                                                                                                                                                                                                                                                                                                                                                                                                                                                                                                                        | 808.4330             | -0.0070  | 0        | 44       | 0.01     | 1    | R.LASYLDK.V                   |        |      |         |          |          |           |           |         |   |    |         |   |                   |           |          |           |           |         |   |    |         |   |              |           |          |           |           |         |   |    |         |   |                |           |          |           |           |         |   |    |        |   |                               |           |          |           |           |         |   |    |          |   |                   |           |          |           |           |         |   |     |          |   |                               |           |          |           |           |         |   |    |       |   |                 |           |          |           |           |         |   |    |         |   |               |           |          |           |           |         |   |    |          |   |                 |           |          |           |           |         |   |    |        |   |                 |  |
| <u>14</u>      | 515.2975   | 1028.5804                                                                                                                                                                                                                                                                                                                                                                                                                                                                                                                                                                                                                                                                                                                                                                                                                                                                                                                                                                                                                                                                                                                                                                                                                                                                                                                                                                                                                                                                                                                                                                                                                                                                                                                                                                                                                                                                                                                                                                                                                                                                       | 1028.5866            | -0.0061  | 0        | 46       | 0.0067   | 1    | R.VLDELTLAR.T                 |        |      |         |          |          |           |           |         |   |    |         |   |                   |           |          |           |           |         |   |    |         |   |              |           |          |           |           |         |   |    |         |   |                |           |          |           |           |         |   |    |        |   |                               |           |          |           |           |         |   |    |          |   |                   |           |          |           |           |         |   |     |          |   |                               |           |          |           |           |         |   |    |       |   |                 |           |          |           |           |         |   |    |         |   |               |           |          |           |           |         |   |    |          |   |                 |           |          |           |           |         |   |    |        |   |                 |  |
| <u>16</u>      | 518.7676   | 1035.5206                                                                                                                                                                                                                                                                                                                                                                                                                                                                                                                                                                                                                                                                                                                                                                                                                                                                                                                                                                                                                                                                                                                                                                                                                                                                                                                                                                                                                                                                                                                                                                                                                                                                                                                                                                                                                                                                                                                                                                                                                                                                       | 1035.5250            | -0.0043  | 1        | 32       | 0.14     | 1    | K.IRDWYQR.Q                   |        |      |         |          |          |           |           |         |   |    |         |   |                   |           |          |           |           |         |   |    |         |   |              |           |          |           |           |         |   |    |         |   |                |           |          |           |           |         |   |    |        |   |                               |           |          |           |           |         |   |    |          |   |                   |           |          |           |           |         |   |     |          |   |                               |           |          |           |           |         |   |    |       |   |                 |           |          |           |           |         |   |    |         |   |               |           |          |           |           |         |   |    |          |   |                 |           |          |           |           |         |   |    |        |   |                 |  |
| <u>22</u>      | 532.8054   | 1063.5962                                                                                                                                                                                                                                                                                                                                                                                                                                                                                                                                                                                                                                                                                                                                                                                                                                                                                                                                                                                                                                                                                                                                                                                                                                                                                                                                                                                                                                                                                                                                                                                                                                                                                                                                                                                                                                                                                                                                                                                                                                                                       | 1063.6026            | -0.0063  | 1        | 28       | 0.37     | 1    | R.LASYLDKVR.A                 |        |      |         |          |          |           |           |         |   |    |         |   |                   |           |          |           |           |         |   |    |         |   |              |           |          |           |           |         |   |    |         |   |                |           |          |           |           |         |   |    |        |   |                               |           |          |           |           |         |   |    |          |   |                   |           |          |           |           |         |   |     |          |   |                               |           |          |           |           |         |   |    |       |   |                 |           |          |           |           |         |   |    |         |   |               |           |          |           |           |         |   |    |          |   |                 |           |          |           |           |         |   |    |        |   |                 |  |
| <u>25</u>      | 553.7610   | 1105.5074                                                                                                                                                                                                                                                                                                                                                                                                                                                                                                                                                                                                                                                                                                                                                                                                                                                                                                                                                                                                                                                                                                                                                                                                                                                                                                                                                                                                                                                                                                                                                                                                                                                                                                                                                                                                                                                                                                                                                                                                                                                                       | 1105.5186            | -0.0112  | 0        | 86       | 6.5e-007 | 1    | K.VTMQNLNDR.L + Oxidation (M) |        |      |         |          |          |           |           |         |   |    |         |   |                   |           |          |           |           |         |   |    |         |   |              |           |          |           |           |         |   |    |         |   |                |           |          |           |           |         |   |    |        |   |                               |           |          |           |           |         |   |    |          |   |                   |           |          |           |           |         |   |     |          |   |                               |           |          |           |           |         |   |    |       |   |                 |           |          |           |           |         |   |    |         |   |               |           |          |           |           |         |   |    |          |   |                 |           |          |           |           |         |   |    |        |   |                 |  |
| <u>26</u>      | 553.7827   | 1105.5508                                                                                                                                                                                                                                                                                                                                                                                                                                                                                                                                                                                                                                                                                                                                                                                                                                                                                                                                                                                                                                                                                                                                                                                                                                                                                                                                                                                                                                                                                                                                                                                                                                                                                                                                                                                                                                                                                                                                                                                                                                                                       | 1105.5550            | -0.0041  | 0        | 45       | 0.008    | 1    | R.ISSVLAGGSCR.A               |        |      |         |          |          |           |           |         |   |    |         |   |                   |           |          |           |           |         |   |    |         |   |              |           |          |           |           |         |   |    |         |   |                |           |          |           |           |         |   |    |        |   |                               |           |          |           |           |         |   |    |          |   |                   |           |          |           |           |         |   |     |          |   |                               |           |          |           |           |         |   |    |       |   |                 |           |          |           |           |         |   |    |         |   |               |           |          |           |           |         |   |    |          |   |                 |           |          |           |           |         |   |    |        |   |                 |  |
| <u>30</u>      | 561.7925   | 1121.5704                                                                                                                                                                                                                                                                                                                                                                                                                                                                                                                                                                                                                                                                                                                                                                                                                                                                                                                                                                                                                                                                                                                                                                                                                                                                                                                                                                                                                                                                                                                                                                                                                                                                                                                                                                                                                                                                                                                                                                                                                                                                       | 1121.5717            | -0.0012  | 0        | 61       | 0.00022  | 1    | R.LEQEIATYR.R                 |        |      |         |          |          |           |           |         |   |    |         |   |                   |           |          |           |           |         |   |    |         |   |              |           |          |           |           |         |   |    |         |   |                |           |          |           |           |         |   |    |        |   |                               |           |          |           |           |         |   |    |          |   |                   |           |          |           |           |         |   |     |          |   |                               |           |          |           |           |         |   |    |       |   |                 |           |          |           |           |         |   |    |         |   |               |           |          |           |           |         |   |    |          |   |                 |           |          |           |           |         |   |    |        |   |                 |  |
| <u>33</u>      | 610.8013   | 1219.5880                                                                                                                                                                                                                                                                                                                                                                                                                                                                                                                                                                                                                                                                                                                                                                                                                                                                                                                                                                                                                                                                                                                                                                                                                                                                                                                                                                                                                                                                                                                                                                                                                                                                                                                                                                                                                                                                                                                                                                                                                                                                       | 1219.5932            | -0.0051  | 0        | 69       | 3.2e-005 | 1    | K.ASLENSLEETK.G               |        |      |         |          |          |           |           |         |   |    |         |   |                   |           |          |           |           |         |   |    |         |   |              |           |          |           |           |         |   |    |         |   |                |           |          |           |           |         |   |    |        |   |                               |           |          |           |           |         |   |    |          |   |                   |           |          |           |           |         |   |     |          |   |                               |           |          |           |           |         |   |    |       |   |                 |           |          |           |           |         |   |    |         |   |               |           |          |           |           |         |   |    |          |   |                 |           |          |           |           |         |   |    |        |   |                 |  |
| <u>39</u>      | 630.7877   | 1259.5608                                                                                                                                                                                                                                                                                                                                                                                                                                                                                                                                                                                                                                                                                                                                                                                                                                                                                                                                                                                                                                                                                                                                                                                                                                                                                                                                                                                                                                                                                                                                                                                                                                                                                                                                                                                                                                                                                                                                                                                                                                                                       | 1259.5630            | -0.0021  | 0        | 46       | 0.0057   | 1    | R.EVFTSSSSSSR.Q               |        |      |         |          |          |           |           |         |   |    |         |   |                   |           |          |           |           |         |   |    |         |   |              |           |          |           |           |         |   |    |         |   |                |           |          |           |           |         |   |    |        |   |                               |           |          |           |           |         |   |    |          |   |                   |           |          |           |           |         |   |     |          |   |                               |           |          |           |           |         |   |    |       |   |                 |           |          |           |           |         |   |    |         |   |               |           |          |           |           |         |   |    |          |   |                 |           |          |           |           |         |   |    |        |   |                 |  |
| 30             | 1302<br>1. | Hsp-27 Phospho S82<br>HHHU27 _____ Mass: 22826 Score: 375 Coverage: 24%<br>heat shock protein 27 - human<br>Check to include this hit in error tolerant search or archive report                                                                                                                                                                                                                                                                                                                                                                                                                                                                                                                                                                                                                                                                                                                                                                                                                                                                                                                                                                                                                                                                                                                                                                                                                                                                                                                                                                                                                                                                                                                                                                                                                                                                                                                                                                                                                                                                                                | 6                    |          |          |          |          |      |                               |        |      |         |          |          |           |           |         |   |    |         |   |                   |           |          |           |           |         |   |    |         |   |              |           |          |           |           |         |   |    |         |   |                |           |          |           |           |         |   |    |        |   |                               |           |          |           |           |         |   |    |          |   |                   |           |          |           |           |         |   |     |          |   |                               |           |          |           |           |         |   |    |       |   |                 |           |          |           |           |         |   |    |         |   |               |           |          |           |           |         |   |    |          |   |                 |           |          |           |           |         |   |    |        |   |                 |  |
|                |            | <table border="1"> <thead> <tr> <th>Query</th> <th>Observed</th> <th>Mr(expt)</th> <th>Mr(calc)</th> <th>Delta</th> <th>Miss</th> <th>Score</th> <th>Expect</th> <th>Rank</th> <th>Peptide</th> </tr> </thead> <tbody> <tr> <td><u>9</u></td> <td>471.3003</td> <td>940.5860</td> <td>940.4978</td> <td>0.0883</td> <td>0</td> <td>33</td> <td>0.23</td> <td>1</td> <td>R.AQLGGPEAAK.S</td> </tr> <tr> <td><u>20</u></td> <td>552.8088</td> <td>1103.6030</td> <td>1103.4996</td> <td>0.1035</td> <td>0</td> <td>61</td> <td>0.00034</td> <td>1</td> <td>R.QDEHGYSRLC</td> </tr> <tr> <td><u>22</u></td> <td>573.8721</td> <td>1145.7296</td> <td>1145.6292</td> <td>0.1004</td> <td>1</td> <td>65</td> <td>0.00013</td> <td>1</td> <td>K.TKDGVEITGK.H</td> </tr> <tr> <td><u>23</u></td> <td>578.3216</td> <td>1154.6286</td> <td>1154.5332</td> <td>0.0954</td> <td>0</td> <td>71</td> <td>4e-005</td> <td>1</td> <td>R.QLSSGVSEIR.H + Phospho (ST)</td> </tr> <tr> <td><u>33</u></td> <td>490.2900</td> <td>1467.8482</td> <td>1467.7318</td> <td>0.1164</td> <td>1</td> <td>70</td> <td>4.4e-005</td> <td>1</td> <td>K.DGVVEITGKHEER.Q</td> </tr> <tr> <td><u>34</u></td> <td>548.6583</td> <td>1642.9531</td> <td>1642.8162</td> <td>0.1369</td> <td>1</td> <td>116</td> <td>9.7e-010</td> <td>1</td> <td>R.AQLGGPEAAKSDETAAK.-</td> </tr> </tbody> </table>                                                                                                                                                                                                                                                                                                                                                                                                                                                                                                                                                                                                                                                                                                               | Query                | Observed | Mr(expt) | Mr(calc) | Delta    | Miss | Score                         | Expect | Rank | Peptide | <u>9</u> | 471.3003 | 940.5860  | 940.4978  | 0.0883  | 0 | 33 | 0.23    | 1 | R.AQLGGPEAAK.S    | <u>20</u> | 552.8088 | 1103.6030 | 1103.4996 | 0.1035  | 0 | 61 | 0.00034 | 1 | R.QDEHGYSRLC | <u>22</u> | 573.8721 | 1145.7296 | 1145.6292 | 0.1004  | 1 | 65 | 0.00013 | 1 | K.TKDGVEITGK.H | <u>23</u> | 578.3216 | 1154.6286 | 1154.5332 | 0.0954  | 0 | 71 | 4e-005 | 1 | R.QLSSGVSEIR.H + Phospho (ST) | <u>33</u> | 490.2900 | 1467.8482 | 1467.7318 | 0.1164  | 1 | 70 | 4.4e-005 | 1 | K.DGVVEITGKHEER.Q | <u>34</u> | 548.6583 | 1642.9531 | 1642.8162 | 0.1369  | 1 | 116 | 9.7e-010 | 1 | R.AQLGGPEAAKSDETAAK.-         |           |          |           |           |         |   |    |       |   |                 |           |          |           |           |         |   |    |         |   |               |           |          |           |           |         |   |    |          |   |                 |           |          |           |           |         |   |    |        |   |                 |  |
| Query          | Observed   | Mr(expt)                                                                                                                                                                                                                                                                                                                                                                                                                                                                                                                                                                                                                                                                                                                                                                                                                                                                                                                                                                                                                                                                                                                                                                                                                                                                                                                                                                                                                                                                                                                                                                                                                                                                                                                                                                                                                                                                                                                                                                                                                                                                        | Mr(calc)             | Delta    | Miss     | Score    | Expect   | Rank | Peptide                       |        |      |         |          |          |           |           |         |   |    |         |   |                   |           |          |           |           |         |   |    |         |   |              |           |          |           |           |         |   |    |         |   |                |           |          |           |           |         |   |    |        |   |                               |           |          |           |           |         |   |    |          |   |                   |           |          |           |           |         |   |     |          |   |                               |           |          |           |           |         |   |    |       |   |                 |           |          |           |           |         |   |    |         |   |               |           |          |           |           |         |   |    |          |   |                 |           |          |           |           |         |   |    |        |   |                 |  |
| <u>9</u>       | 471.3003   | 940.5860                                                                                                                                                                                                                                                                                                                                                                                                                                                                                                                                                                                                                                                                                                                                                                                                                                                                                                                                                                                                                                                                                                                                                                                                                                                                                                                                                                                                                                                                                                                                                                                                                                                                                                                                                                                                                                                                                                                                                                                                                                                                        | 940.4978             | 0.0883   | 0        | 33       | 0.23     | 1    | R.AQLGGPEAAK.S                |        |      |         |          |          |           |           |         |   |    |         |   |                   |           |          |           |           |         |   |    |         |   |              |           |          |           |           |         |   |    |         |   |                |           |          |           |           |         |   |    |        |   |                               |           |          |           |           |         |   |    |          |   |                   |           |          |           |           |         |   |     |          |   |                               |           |          |           |           |         |   |    |       |   |                 |           |          |           |           |         |   |    |         |   |               |           |          |           |           |         |   |    |          |   |                 |           |          |           |           |         |   |    |        |   |                 |  |
| <u>20</u>      | 552.8088   | 1103.6030                                                                                                                                                                                                                                                                                                                                                                                                                                                                                                                                                                                                                                                                                                                                                                                                                                                                                                                                                                                                                                                                                                                                                                                                                                                                                                                                                                                                                                                                                                                                                                                                                                                                                                                                                                                                                                                                                                                                                                                                                                                                       | 1103.4996            | 0.1035   | 0        | 61       | 0.00034  | 1    | R.QDEHGYSRLC                  |        |      |         |          |          |           |           |         |   |    |         |   |                   |           |          |           |           |         |   |    |         |   |              |           |          |           |           |         |   |    |         |   |                |           |          |           |           |         |   |    |        |   |                               |           |          |           |           |         |   |    |          |   |                   |           |          |           |           |         |   |     |          |   |                               |           |          |           |           |         |   |    |       |   |                 |           |          |           |           |         |   |    |         |   |               |           |          |           |           |         |   |    |          |   |                 |           |          |           |           |         |   |    |        |   |                 |  |
| <u>22</u>      | 573.8721   | 1145.7296                                                                                                                                                                                                                                                                                                                                                                                                                                                                                                                                                                                                                                                                                                                                                                                                                                                                                                                                                                                                                                                                                                                                                                                                                                                                                                                                                                                                                                                                                                                                                                                                                                                                                                                                                                                                                                                                                                                                                                                                                                                                       | 1145.6292            | 0.1004   | 1        | 65       | 0.00013  | 1    | K.TKDGVEITGK.H                |        |      |         |          |          |           |           |         |   |    |         |   |                   |           |          |           |           |         |   |    |         |   |              |           |          |           |           |         |   |    |         |   |                |           |          |           |           |         |   |    |        |   |                               |           |          |           |           |         |   |    |          |   |                   |           |          |           |           |         |   |     |          |   |                               |           |          |           |           |         |   |    |       |   |                 |           |          |           |           |         |   |    |         |   |               |           |          |           |           |         |   |    |          |   |                 |           |          |           |           |         |   |    |        |   |                 |  |
| <u>23</u>      | 578.3216   | 1154.6286                                                                                                                                                                                                                                                                                                                                                                                                                                                                                                                                                                                                                                                                                                                                                                                                                                                                                                                                                                                                                                                                                                                                                                                                                                                                                                                                                                                                                                                                                                                                                                                                                                                                                                                                                                                                                                                                                                                                                                                                                                                                       | 1154.5332            | 0.0954   | 0        | 71       | 4e-005   | 1    | R.QLSSGVSEIR.H + Phospho (ST) |        |      |         |          |          |           |           |         |   |    |         |   |                   |           |          |           |           |         |   |    |         |   |              |           |          |           |           |         |   |    |         |   |                |           |          |           |           |         |   |    |        |   |                               |           |          |           |           |         |   |    |          |   |                   |           |          |           |           |         |   |     |          |   |                               |           |          |           |           |         |   |    |       |   |                 |           |          |           |           |         |   |    |         |   |               |           |          |           |           |         |   |    |          |   |                 |           |          |           |           |         |   |    |        |   |                 |  |
| <u>33</u>      | 490.2900   | 1467.8482                                                                                                                                                                                                                                                                                                                                                                                                                                                                                                                                                                                                                                                                                                                                                                                                                                                                                                                                                                                                                                                                                                                                                                                                                                                                                                                                                                                                                                                                                                                                                                                                                                                                                                                                                                                                                                                                                                                                                                                                                                                                       | 1467.7318            | 0.1164   | 1        | 70       | 4.4e-005 | 1    | K.DGVVEITGKHEER.Q             |        |      |         |          |          |           |           |         |   |    |         |   |                   |           |          |           |           |         |   |    |         |   |              |           |          |           |           |         |   |    |         |   |                |           |          |           |           |         |   |    |        |   |                               |           |          |           |           |         |   |    |          |   |                   |           |          |           |           |         |   |     |          |   |                               |           |          |           |           |         |   |    |       |   |                 |           |          |           |           |         |   |    |         |   |               |           |          |           |           |         |   |    |          |   |                 |           |          |           |           |         |   |    |        |   |                 |  |
| <u>34</u>      | 548.6583   | 1642.9531                                                                                                                                                                                                                                                                                                                                                                                                                                                                                                                                                                                                                                                                                                                                                                                                                                                                                                                                                                                                                                                                                                                                                                                                                                                                                                                                                                                                                                                                                                                                                                                                                                                                                                                                                                                                                                                                                                                                                                                                                                                                       | 1642.8162            | 0.1369   | 1        | 116      | 9.7e-010 | 1    | R.AQLGGPEAAKSDETAAK.-         |        |      |         |          |          |           |           |         |   |    |         |   |                   |           |          |           |           |         |   |    |         |   |              |           |          |           |           |         |   |    |         |   |                |           |          |           |           |         |   |    |        |   |                               |           |          |           |           |         |   |    |          |   |                   |           |          |           |           |         |   |     |          |   |                               |           |          |           |           |         |   |    |       |   |                 |           |          |           |           |         |   |    |         |   |               |           |          |           |           |         |   |    |          |   |                 |           |          |           |           |         |   |    |        |   |                 |  |
|                |            | S3 : Phospho (ST), with neutral losses 97.9769(shown in table), 0.0000<br>Ions Score: 71 Expect: 4e-005                                                                                                                                                                                                                                                                                                                                                                                                                                                                                                                                                                                                                                                                                                                                                                                                                                                                                                                                                                                                                                                                                                                                                                                                                                                                                                                                                                                                                                                                                                                                                                                                                                                                                                                                                                                                                                                                                                                                                                         |                      |          |          |          |          |      |                               |        |      |         |          |          |           |           |         |   |    |         |   |                   |           |          |           |           |         |   |    |         |   |              |           |          |           |           |         |   |    |         |   |                |           |          |           |           |         |   |    |        |   |                               |           |          |           |           |         |   |    |          |   |                   |           |          |           |           |         |   |     |          |   |                               |           |          |           |           |         |   |    |       |   |                 |           |          |           |           |         |   |    |         |   |               |           |          |           |           |         |   |    |          |   |                 |           |          |           |           |         |   |    |        |   |                 |  |

**Mascot Search Results**

**Peptide View**

**MS/MS Fragmentation of SSAEVIAQAR**

Found in **JC5317**, dihydropyrimidinase-related protein 2 - human

Match to Query 3: 1030.601048 from(516.307800,2+) intensity(759.7000)

Data file C:\Documents and Settings\micromass\Desktop\pk\vv\_740\_050915\_39.pkl

Click mouse within plot area to zoom in by factor of two about that point

Or, Plot from:  to  Da

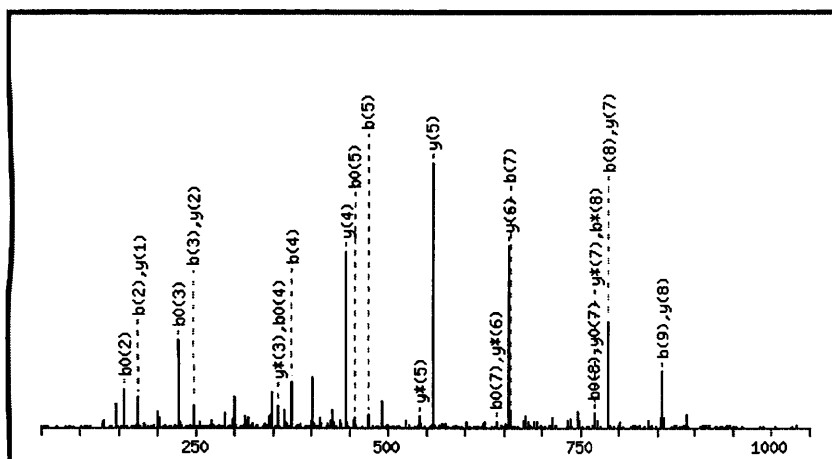

Monoisotopic mass of neutral peptide  $M_r(\text{calc})$ : 1030.5407

Fixed modifications: Carbamidomethyl (C)

Ions Score: 41 Expect: 0.035

Matches (Bold Red): 26/82 fragment ions using 47 most intense peaks

| #  | b        | b <sup>++</sup> | b*       | b <sup>*++</sup> | b <sup>0</sup> | b <sup>0++</sup> | Seq. | y        | y <sup>++</sup> | y*       | y <sup>*++</sup> | y <sup>0</sup> | y <sup>0++</sup> | # |
|----|----------|-----------------|----------|------------------|----------------|------------------|------|----------|-----------------|----------|------------------|----------------|------------------|---|
| 1  | 88.0393  | 44.5233         |          |                  | 70.0287        | 35.5180          | S    |          |                 |          |                  |                |                  | 1 |
| 2  | 175.0713 | 88.0393         |          |                  | 157.0608       | 79.0340          | S    | 944.5160 | 472.7616        | 927.4894 | 464.2483         | 926.5054       | 463.7563         |   |
| 3  | 246.1084 | 123.5579        |          |                  | 228.0979       | 114.5526         | A    | 857.4839 | 429.2456        | 840.4574 | 420.7323         | 839.4734       | 420.2403         |   |
| 4  | 375.1510 | 188.0792        |          |                  | 357.1405       | 179.0739         | E    | 786.4468 | 393.7270        | 769.4203 | 385.2138         | 768.4362       | 384.7218         |   |
| 5  | 474.2194 | 237.6134        |          |                  | 456.2089       | 228.6081         | V    | 657.4042 | 329.2057        | 640.3777 | 320.6925         |                |                  |   |
| 6  | 587.3035 | 294.1554        |          |                  | 569.2929       | 285.1501         | I    | 558.3358 | 279.6715        | 541.3093 | 271.1583         |                |                  |   |
| 7  | 658.3406 | 329.6739        |          |                  | 640.3301       | 320.6687         | A    | 445.2518 | 223.1295        | 428.2252 | 214.6162         |                |                  |   |
| 8  | 786.3992 | 393.7032        | 769.3726 | 385.1900         | 768.3886       | 384.6980         | Q    | 374.2146 | 187.6110        | 357.1881 | 179.0977         |                |                  |   |
| 9  | 857.4363 | 429.2218        | 840.4098 | 420.7085         | 839.4257       | 420.2165         | A    | 246.1561 | 123.5817        | 229.1295 | 115.0684         |                |                  |   |
| 10 |          |                 |          |                  |                |                  | R    | 175.1190 | 88.0631         | 158.0924 | 79.5498          |                |                  |   |

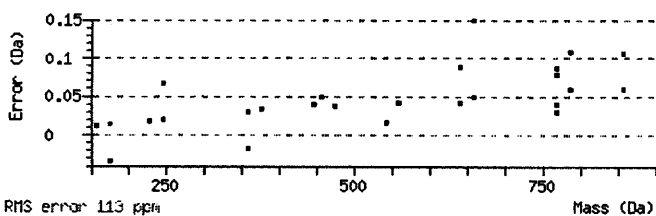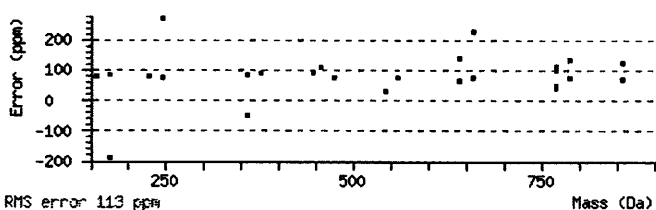

NCBI **BLAST** search of SSAEVIAQAR

(Parameters: blastp, nr protein database, expect=20000, no filter, PAM30)

Table S2C

spot 740

Other BLAST [web gateways](#)

## All matches to this query

| Score | Mr(calc): | Delta  | Sequence          |
|-------|-----------|--------|-------------------|
| 41.0  | 1030.5407 | 0.0604 | <u>SSAEVIAQAR</u> |
| 19.0  | 1030.5957 | 0.0054 | <u>MARVIIXNK</u>  |
| 18.7  | 1030.4865 | 0.1145 | <u>AGVCGDPSLR</u> |
| 17.2  | 1030.5195 | 0.0815 | <u>GIXWKDEAR</u>  |
| 16.2  | 1030.4341 | 0.1670 | <u>MQMAVSLR</u>   |
| 13.7  | 1030.5519 | 0.0491 | <u>TSEGVLRNR</u>  |
| 13.5  | 1030.5229 | 0.0781 | <u>CDVVGLAAAR</u> |
| 11.7  | 1030.5883 | 0.0127 | <u>RNSSLLSVR</u>  |
| 11.3  | 1030.4518 | 0.1492 | <u>MSAATVLSR</u>  |
| 11.2  | 1030.4679 | 0.1331 | <u>SEASPENAAR</u> |

**Mascot:** <http://www.matrixscience.com/>

**MASCOT** (SCIENCE) **Mascot Search Results**

**Peptide View**

MS/MS Fragmentation of **SGPEPLQEGPGPK**  
 Found in **Q17RK4\_HUMAN**, Coronin 7.- Homo sapiens (Human).

Match to Query 5: 1291.678048 from(646.846300,2+) intensity(797.4000)  
 Data file C:\Documents and Settings\micromass\Desktop\pkl\otherPKI\vv\_418\_050915\_33.pkl

Click mouse within plot area to zoom in by factor of two about that point

Or, Plot from 0 to 1300 Da Full range

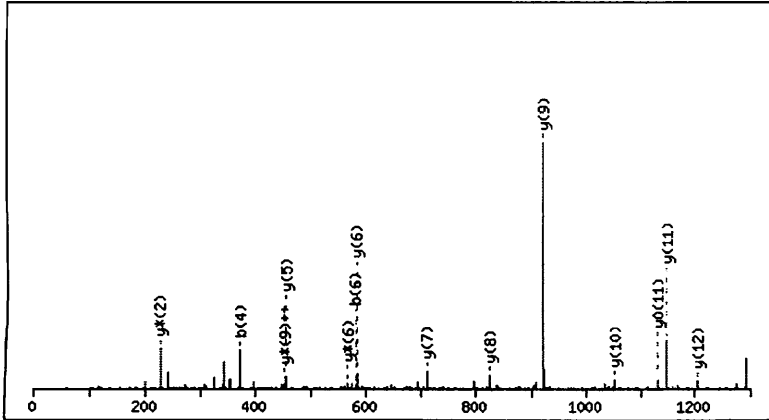

Monoisotopic mass of neutral peptide Mr(calc): 1291.6408  
 Fixed modifications: Carbamidomethyl (C)  
 Ions Score: 56 Expect: 0.00057  
 Matches (Bold Red): 14/122 fragment ions using 24 most intense peaks

| #  | b               | b <sup>++</sup> | b*        | b <sup>+++</sup> | b <sup>0</sup> | b <sup>0++</sup> | Seq. | y                | y <sup>++</sup> | y*              | y <sup>+++</sup> | y <sup>0</sup>   | y <sup>0++</sup> | #  |
|----|-----------------|-----------------|-----------|------------------|----------------|------------------|------|------------------|-----------------|-----------------|------------------|------------------|------------------|----|
| 1  | 88.0393         | 44.5233         |           |                  | 70.0287        | 35.5180          | S    |                  |                 |                 |                  |                  |                  | 13 |
| 2  | 145.0608        | 73.0340         |           |                  | 127.0502       | 64.0287          | G    | <b>1205.6161</b> | 603.3117        | 1188.5895       | 594.7984         | 1187.6055        | 594.3064         | 12 |
| 3  | 242.1135        | 121.5604        |           |                  | 224.1030       | 112.5551         | P    | <b>1148.5946</b> | 574.8009        | 1131.5681       | 566.2877         | <b>1130.5841</b> | 565.7957         | 11 |
| 4  | <b>371.1561</b> | 186.0817        |           |                  | 353.1456       | 177.0764         | E    | <b>1051.5419</b> | 526.2746        | 1034.5153       | 517.7613         | 1033.5313        | 517.2693         | 10 |
| 5  | 468.2089        | 234.6081        |           |                  | 450.1983       | 225.6028         | P    | <b>922.4993</b>  | 461.7533        | 905.4727        | <b>453.2400</b>  | 904.4887         | 452.7480         | 9  |
| 6  | <b>581.2930</b> | 291.1501        |           |                  | 563.2824       | 282.1448         | L    | <b>825.4465</b>  | 413.2269        | 808.4199        | 404.7136         | 807.4359         | 404.2216         | 8  |
| 7  | 709.3515        | 355.1794        | 692.3250  | 346.6661         | 691.3410       | 346.1741         | Q    | <b>712.3624</b>  | 356.6849        | 695.3359        | 348.1716         | 694.3519         | 347.6796         | 7  |
| 8  | 838.3941        | 419.7007        | 821.3676  | 411.1874         | 820.3836       | 410.6954         | E    | <b>584.3039</b>  | 292.6556        | <b>567.2773</b> | 284.1423         | 566.2933         | 283.6503         | 6  |
| 9  | 895.4156        | 448.2114        | 878.3890  | 439.6982         | 877.4050       | 439.2061         | G    | <b>455.2613</b>  | 228.1343        | 438.2347        | 219.6210         |                  |                  | 5  |
| 10 | 992.4684        | 496.7378        | 975.4418  | 488.2245         | 974.4578       | 487.7325         | P    | 398.2398         | 199.6235        | 381.2132        | 191.1103         |                  |                  | 4  |
| 11 | 1049.4898       | 525.2485        | 1032.4633 | 516.7353         | 1031.4793      | 516.2433         | G    | 301.1870         | 151.0972        | 284.1605        | 142.5839         |                  |                  | 3  |
| 12 | 1146.5426       | 573.7749        | 1129.5160 | 565.2617         | 1128.5320      | 564.7696         | P    | 244.1656         | 122.5864        | <b>227.1390</b> | 114.0731         |                  |                  | 2  |
| 13 |                 |                 |           |                  |                |                  | K    | 147.1128         | 74.0600         | 130.0863        | 65.5468          |                  |                  | 1  |

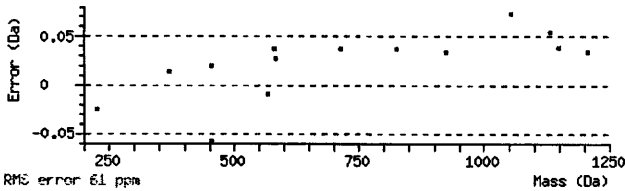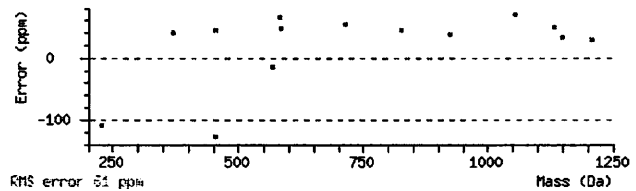

NCBI **BLAST** search of **SGPEPLQEGPGPK**  
 (Parameters: blastp, nr protein database, expect=20000, no filter, PAM30)  
 Other BLAST [web gateways](#)

**All matches to this query**

| Score | Mr(calc): | Delta   | Sequence             |
|-------|-----------|---------|----------------------|
| 55.8  | 1291.6408 | 0.0372  | <b>SGPEPLQEGPGPK</b> |
| 16.4  | 1291.6997 | -0.0216 | <b>SGLIPPREGPGGR</b> |



|     |           |         |              |
|-----|-----------|---------|--------------|
| 8.1 | 1291.7473 | -0.0692 | SRPSRIPOPVR  |
| 2.0 | 1291.6521 | 0.0260  | GSLLSNLGFNDR |
| 1.9 | 1291.6884 | -0.0104 | QLEQTNRYLK   |
| 1.9 | 1291.6521 | 0.0260  | LISGIDNYGQGR |
| 1.8 | 1291.7904 | -0.1123 | ILVAALTFFLGK |
| 1.5 | 1291.7976 | -0.1195 | LTRPPKVLGLQA |
| 1.4 | 1291.6772 | 0.0009  | LQEIYQELTR   |
| 1.1 | 1291.5788 | 0.0993  | AVAEEMMPAAEK |

Mascot: <http://www.matrixscience.com/>

**Mascot Search Results**

**Peptide View**

**MS/MS Fragmentation of ASCLYGQLPK**

Found in **GSTP1\_HUMAN**, Glutathione S-transferase P (EC 2.5.1.18) (GST class-pi) (GSTP1-1),- Homo sapiens (Human).

Match to Query 4: 1135.626248 from(568.820400,2+) intensity(880.2000)

Data file C:\Documents and Settings\micromass\Desktop\pk\otherPK\vv\_1480\_050915\_32.pkl

Click mouse within plot area to zoom in by factor of two about that point

Or, Plot from 0 to 1200 Da Full range

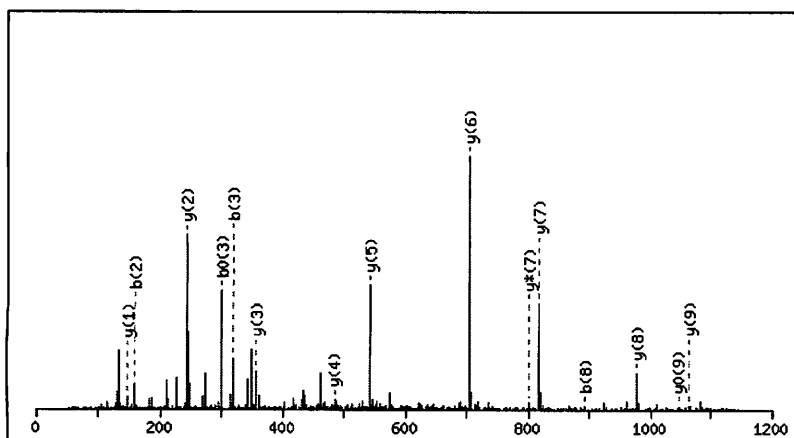

**Monoisotopic mass of neutral peptide  $M_r(\text{calc})$ :** 1135.5696

**Fixed modifications:** Carbamidomethyl (C)

**Ions Score:** 55 **Expect:** 0.00076

**Matches (Bold Red):** 15/78 fragment ions using 40 most intense peaks

| #  | b               | b <sup>++</sup> | b <sup>*</sup> | b <sup>*++</sup> | b <sup>0</sup>  | b <sup>0++</sup> | Seq. | y                | y <sup>++</sup> | y <sup>*</sup>  | y <sup>*++</sup> | y <sup>0</sup>   | y <sup>0++</sup> | #  |
|----|-----------------|-----------------|----------------|------------------|-----------------|------------------|------|------------------|-----------------|-----------------|------------------|------------------|------------------|----|
| 1  | 72.0444         | 36.5258         |                |                  |                 |                  | A    |                  |                 |                 |                  |                  |                  | 10 |
| 2  | <b>159.0764</b> | 80.0418         |                |                  | 141.0659        | 71.0366          | S    | <b>1065.5397</b> | 533.2735        | 1048.5132       | 524.7602         | <b>1047.5292</b> | 524.2682         | 9  |
| 3  | <b>319.1071</b> | 160.0572        |                |                  | <b>301.0965</b> | 151.0519         | C    | <b>978.5077</b>  | 489.7575        | 961.4812        | 481.2442         |                  |                  | 8  |
| 4  | 432.1911        | 216.5992        |                |                  | 414.1806        | 207.5939         | L    | <b>818.4771</b>  | 409.7422        | <b>801.4505</b> | 401.2289         |                  |                  | 7  |
| 5  | 595.2545        | 298.1309        |                |                  | 577.2439        | 289.1256         | Y    | <b>705.3930</b>  | 353.2001        | 688.3665        | 344.6869         |                  |                  | 6  |
| 6  | 652.2759        | 326.6416        |                |                  | 634.2654        | 317.6363         | G    | <b>542.3297</b>  | 271.6685        | 525.3031        | 263.1552         |                  |                  | 5  |
| 7  | 780.3345        | 390.6709        | 763.3080       | 382.1576         | 762.3239        | 381.6656         | Q    | <b>485.3082</b>  | 243.1577        | 468.2817        | 234.6445         |                  |                  | 4  |
| 8  | <b>893.4186</b> | 447.2129        | 876.3920       | 438.6996         | 875.4080        | 438.2076         | L    | <b>357.2496</b>  | 179.1285        | 340.2231        | 170.6152         |                  |                  | 3  |
| 9  | 990.4713        | 495.7393        | 973.4448       | 487.2260         | 972.4608        | 486.7340         | P    | <b>244.1656</b>  | 122.5864        | 227.1390        | 114.0731         |                  |                  | 2  |
| 10 |                 |                 |                |                  |                 |                  | K    | <b>147.1128</b>  | 74.0600         | 130.0863        | 65.5468          |                  |                  | 1  |

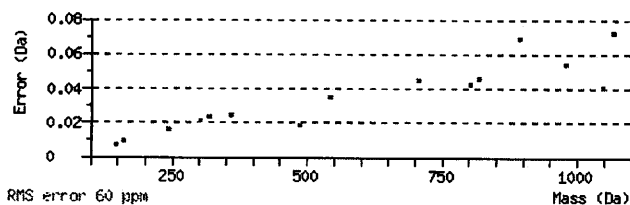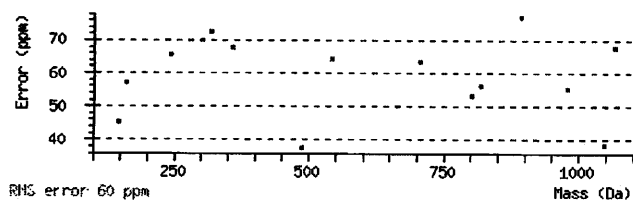

NCBI **BLAST** search of **ASCLYGQLPK**

(Parameters: blastp, nr protein database, expect=20000, no filter, PAM30)

Other BLAST [web gateways](#)

## All matches to this query

| Score | Mr(calc): | Delta  | Sequence      |
|-------|-----------|--------|---------------|
| 54.8  | 1135.5696 | 0.0567 | ASCLYGQLPK    |
| 17.4  | 1135.5179 | 0.1083 | XSCEATGVDVK   |
| 3.3   | 1135.5146 | 0.1117 | NEFGELQGDK    |
| 2.3   | 1135.5179 | 0.1083 | AAEGVSAADMAK  |
| 0.2   | 1135.5986 | 0.0277 | AGNPGTPGAPGLK |
| 0.2   | 1135.5550 | 0.0713 | FLEDSSLNW     |

Mascot: <http://www.matrixscience.com/>

*{MATRIX}*  
*{SCIENCE}* **Mascot Search Results**

**Peptide View**

MS/MS Fragmentation of **GPSSVEDIK**

Found in **Q6V962\_HUMAN**, Nucleophosmin.- Homo sapiens (Human).

Match to Query 5: 930.466048 from(466.240300,2+) intensity(715.9000)

Data file C:\Documents and Settings\micromass\Desktop\pkl\vv\_1277\_050915\_25.pkl

Click mouse within plot area to zoom in by factor of two about that point

Or, Plot from  to  Da Full range

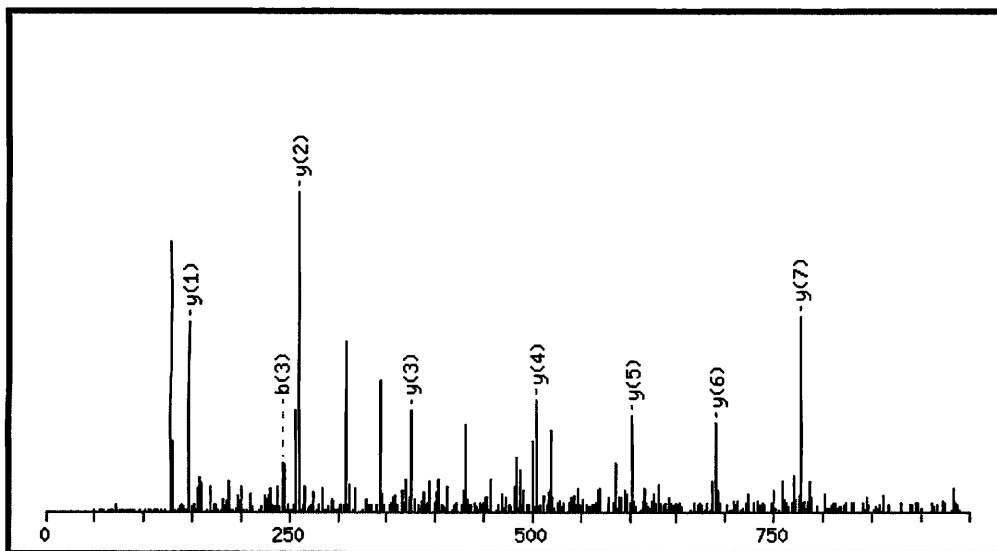

**Monoisotopic mass of neutral peptide Mr(calc):** 930.4658

**Fixed modifications:** Carbamidomethyl (C)

**Ions Score:** 53 **Expect:** 0.0024

**Matches (Bold Red):** 8/72 fragment ions using 18 most intense peaks

| # | b               | b <sup>++</sup> | b <sup>0</sup> | b <sup>0++</sup> | Seq.     | y               | y <sup>++</sup> | y <sup>*</sup> | y <sup>*++</sup> | y <sup>0</sup> | y <sup>0++</sup> | # |
|---|-----------------|-----------------|----------------|------------------|----------|-----------------|-----------------|----------------|------------------|----------------|------------------|---|
| 1 | 58.0287         | 29.5180         |                |                  | <b>G</b> |                 |                 |                |                  |                |                  | 9 |
| 2 | 155.0815        | 78.0444         |                |                  | P        | 874.4516        | 437.7294        | 857.4251       | 429.2162         | 856.4411       | 428.7242         | 8 |
| 3 | <b>242.1135</b> | 121.5604        | 224.1030       | 112.5551         | S        | <b>777.3989</b> | 389.2031        | 760.3723       | 380.6898         | 759.3883       | 380.1978         | 7 |
| 4 | 329.1456        | 165.0764        | 311.1350       | 156.0711         | S        | <b>690.3668</b> | 345.6871        | 673.3403       | 337.1738         | 672.3563       | 336.6818         | 6 |
| 5 | 428.2140        | 214.6106        | 410.2034       | 205.6053         | V        | <b>603.3348</b> | 302.1710        | 586.3083       | 293.6578         | 585.3242       | 293.1658         | 5 |
| 6 | 557.2566        | 279.1319        | 539.2460       | 270.1266         | E        | <b>504.2664</b> | 252.6368        | 487.2398       | 244.1236         | 486.2558       | 243.6316         | 4 |
| 7 | 672.2835        | 336.6454        | 654.2729       | 327.6401         | D        | <b>375.2238</b> | 188.1155        | 358.1973       | 179.6023         | 357.2132       | 179.1103         | 3 |
| 8 | 785.3676        | 393.1874        | 767.3570       | 384.1821         | I        | <b>260.1969</b> | 130.6021        | 243.1703       | 122.0888         |                |                  | 2 |
| 9 |                 |                 |                |                  | K        | <b>147.1128</b> | 74.0600         | 130.0863       | 65.5468          |                |                  | 1 |

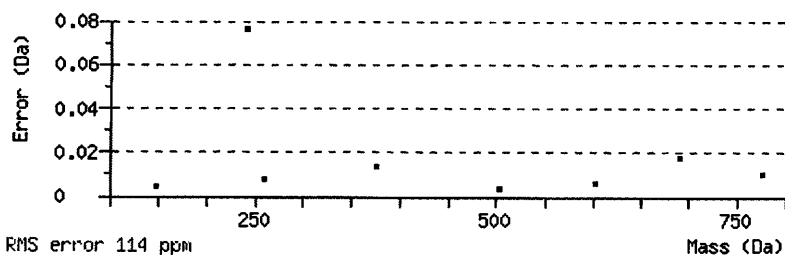

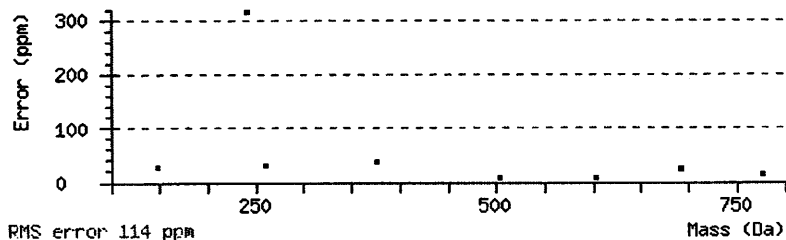

NCBI **BLAST** search of GPSSVEDIK

(Parameters: blastp, nr protein database, expect=20000, no filter, PAM30)

Other BLAST [web gateways](#)

**All matches to this query**

| Score | Mr(calc): | Delta   | Sequence         |
|-------|-----------|---------|------------------|
| 52.7  | 930.4658  | 0.0003  | <u>GPSSVEDIK</u> |
| 13.1  | 930.4997  | -0.0336 | <u>GSPWMLKL</u>  |
| 9.4   | 930.4099  | 0.0561  | <u>AYIEDLK</u>   |
| 9.4   | 930.4099  | 0.0561  | <u>FSIEDLK</u>   |
| 9.4   | 930.4099  | 0.0561  | <u>YAIEDLK</u>   |
| 9.2   | 930.5022  | -0.0361 | <u>XTVLEDLK</u>  |
| 8.8   | 930.3517  | 0.1143  | <u>GSDGGSMLK</u> |
| 8.5   | 930.4286  | 0.0375  | <u>ETVPMLK</u>   |
| 8.3   | 930.5022  | -0.0361 | <u>LTVXEDLK</u>  |
| 6.7   | 930.4000  | 0.0660  | <u>YGLXHFK</u>   |

**Mascot:** <http://www.matrixscience.com/>

**MASCOT** **SCIENCE** **Mascot Search Results**

**Peptide View**

MS/MS Fragmentation of **EVFTSSSSSSSR**

Found in **K1C16\_HUMAN**, Keratin, type I cytoskeletal 16 (Cytokeratin-16) (CK-16) (Keratin-16) (K16).- Homo sapiens (Human).

Match to Query 39: 1259.560848 from(630.787700,2+) intensity(1460.7000)

Data file C:\Documents and Settings\micromass\Desktop\pk\otherPKI\vv\_986\_050915\_44.pk

Click mouse within plot area to zoom in by factor of two about that point

Or, Plot from  to  Da

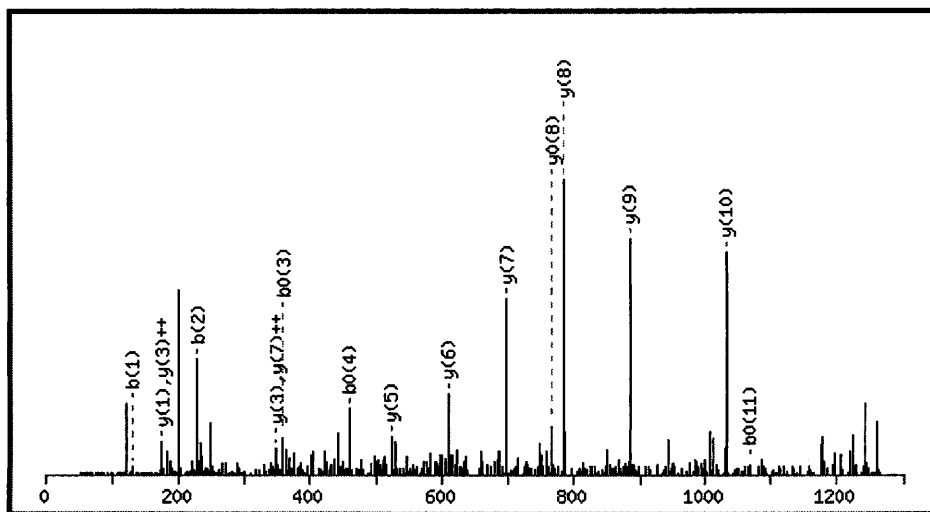

**Monoisotopic mass of neutral peptide Mr(calc): 1259.5630**

**Fixed modifications:** Carbamidomethyl (C)

**Ions Score:** 46 **Expect:** 0.0057

**Matches (Bold Red):** 16/108 fragment ions using 45 most intense peaks

| #  | b         | b <sup>++</sup> | b <sup>0</sup>   | b <sup>0++</sup> | Seq.     | y                | y <sup>++</sup> | y <sup>*</sup> | y <sup>*++</sup> | y <sup>0</sup>  | y <sup>0++</sup> | #  |
|----|-----------|-----------------|------------------|------------------|----------|------------------|-----------------|----------------|------------------|-----------------|------------------|----|
| 1  | 130.0499  | 65.5286         | 112.0393         | 56.5233          | E        |                  |                 |                |                  |                 |                  | 12 |
| 2  | 229.1183  | 115.0628        | 211.1077         | 106.0575         | V        | 1131.5277        | 566.2675        | 1114.5011      | 557.7542         | 1113.5171       | 557.2622         | 11 |
| 3  | 376.1867  | 188.5970        | <b>358.1761</b>  | 179.5917         | <b>F</b> | <b>1032.4592</b> | 516.7333        | 1015.4327      | 508.2200         | 1014.4487       | 507.7280         | 10 |
| 4  | 477.2344  | 239.1208        | <b>459.2238</b>  | 230.1155         | T        | <b>885.3908</b>  | 443.1991        | 868.3643       | 434.6858         | 867.3803        | 434.1938         | 9  |
| 5  | 564.2664  | 282.6368        | 546.2558         | 273.6316         | S        | <b>784.3431</b>  | 392.6752        | 767.3166       | 384.1619         | <b>766.3326</b> | 383.6699         | 8  |
| 6  | 651.2984  | 326.1529        | 633.2879         | 317.1476         | S        | <b>697.3111</b>  | <b>349.1592</b> | 680.2846       | 340.6459         | 679.3006        | 340.1539         | 7  |
| 7  | 738.3305  | 369.6689        | 720.3199         | 360.6636         | S        | <b>610.2791</b>  | 305.6432        | 593.2525       | 297.1299         | 592.2685        | 296.6379         | 6  |
| 8  | 825.3625  | 413.1849        | 807.3519         | 404.1796         | S        | <b>523.2471</b>  | 262.1272        | 506.2205       | 253.6139         | 505.2365        | 253.1219         | 5  |
| 9  | 912.3945  | 456.7009        | 894.3840         | 447.6956         | S        | 436.2150         | 218.6112        | 419.1885       | 210.0979         | 418.2045        | 209.6059         | 4  |
| 10 | 999.4265  | 500.2169        | 981.4160         | 491.2116         | S        | <b>349.1830</b>  | <b>175.0951</b> | 332.1565       | 166.5819         | 331.1724        | 166.0899         | 3  |
| 11 | 1086.4586 | 543.7329        | <b>1068.4480</b> | 534.7276         | S        | 262.1510         | 131.5791        | 245.1244       | 123.0659         | 244.1404        | 122.5738         | 2  |
| 12 |           |                 |                  |                  | <b>R</b> | <b>175.1190</b>  | 88.0631         | 158.0924       | 79.5498          |                 |                  | 1  |

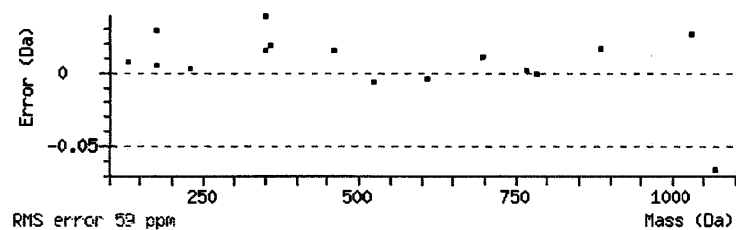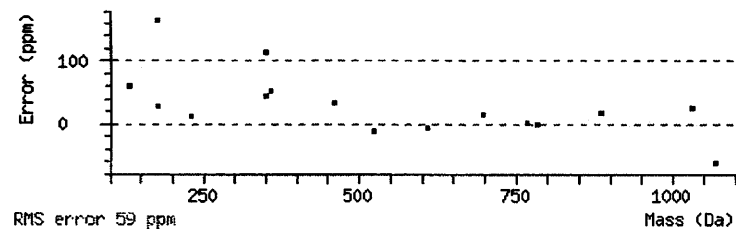

NCBI **BLAST** search of EVFTSSSSSSSR

(Parameters: blastp, nr protein database, expect=20000, no filter, PAM30)

Other BLAST [web gateways](#)

**All matches to this query**

| Score | Mr(calc): | Delta   | Sequence            |
|-------|-----------|---------|---------------------|
| 45.9  | 1259.5630 | -0.0021 | <u>EVFTSSSSSSSR</u> |
| 7.8   | 1259.6544 | -0.0935 | <u>LMTISHTTTQK</u>  |
| 6.2   | 1259.6366 | -0.0757 | <u>MPMNAALGKPSK</u> |
| 3.0   | 1259.6398 | -0.0789 | <u>YPDPVIKVNDT</u>  |
| 2.4   | 1259.5816 | -0.0208 | <u>EIDVHSGTXQK</u>  |

**Mascot:** <http://www.matrixscience.com/>

*MATRIX*  
*SCIENCE* Mascot Search Results

## Peptide View

MS/MS Fragmentation of **QLSSGVSEIR**Found in **HHHU27**, heat shock protein 27 - human

Match to Query 23: 1154.628648 from(578.321600,2+) intensity(17044.2000)

Data file C:\Documents and Settings\micromass\Desktop\pk\otherPK\VV\_URBC\_050620\_1302\_010.pkl

Click mouse within plot area to zoom in by factor of two about that point

Or,  0 to  Da 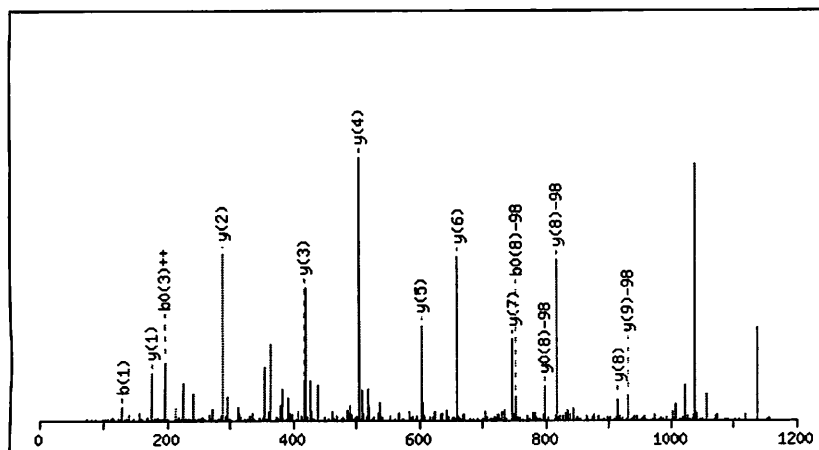

Monoisotopic mass of neutral peptide Mr(calc): 1154.5332

Fixed modifications: Carbamidomethyl (C)

Variable modifications:

S3 : Phospho (ST), with neutral losses 97.9769 (shown in table), 0.0000

Ions Score: 71 Expect: 4e-005

Matches (Bold Red): 14/154 fragment ions using 25 most intense peaks

| #  | b               | b <sup>++</sup> | b <sup>*</sup> | b <sup>*++</sup> | b <sup>0</sup>  | b <sup>0++</sup> | Seq. | y               | y <sup>++</sup> | y <sup>*</sup> | y <sup>*++</sup> | y <sup>0</sup>  | y <sup>0++</sup> | #  |
|----|-----------------|-----------------|----------------|------------------|-----------------|------------------|------|-----------------|-----------------|----------------|------------------|-----------------|------------------|----|
| 1  | <b>129.0659</b> | 65.0366         | 112.0393       | 56.5233          |                 |                  | Q    |                 |                 |                |                  |                 |                  | 10 |
| 2  | 242.1499        | 121.5786        | 225.1234       | 113.0653         |                 |                  | L    | <b>929.5051</b> | 465.2562        | 912.4785       | 456.7429         | 911.4945        | 456.2509         | 9  |
| 3  | 311.1714        | 156.0893        | 294.1448       | 147.5761         | 293.1608        | 147.0840         | S    | <b>816.4210</b> | 408.7141        | 799.3945       | 400.2009         | <b>798.4104</b> | 399.7089         | 8  |
| 4  | 398.2034        | 199.6053        | 381.1769       | 191.0921         | 380.1928        | 190.6001         | S    | <b>747.3995</b> | 374.2034        | 730.3730       | 365.6901         | 729.3890        | 365.1981         | 7  |
| 5  | 455.2249        | 228.1161        | 438.1983       | 219.6028         | 437.2143        | 219.1108         | G    | <b>660.3675</b> | 330.6874        | 643.3410       | 322.1741         | 642.3570        | 321.6821         | 6  |
| 6  | 554.2933        | 277.6503        | 537.2667       | 269.1370         | 536.2827        | 268.6450         | V    | <b>603.3461</b> | 302.1767        | 586.3195       | 293.6634         | 585.3355        | 293.1714         | 5  |
| 7  | 641.3253        | 321.1663        | 624.2988       | 312.6530         | 623.3147        | 312.1610         | S    | <b>504.2776</b> | 252.6425        | 487.2511       | 244.1292         | 486.2671        | 243.6372         | 4  |
| 8  | 770.3679        | 385.6876        | 753.3414       | 377.1743         | <b>752.3573</b> | 376.6823         | E    | <b>417.2456</b> | 209.1264        | 400.2191       | 200.6132         | 399.2350        | 200.1212         | 3  |
| 9  | 883.4520        | 442.2296        | 866.4254       | 433.7163         | 865.4414        | 433.2243         | I    | <b>288.2030</b> | 144.6051        | 271.1765       | 136.0919         |                 |                  | 2  |
| 10 |                 |                 |                |                  |                 |                  | R    | <b>175.1190</b> | 88.0631         | 158.0924       | 79.5498          |                 |                  | 1  |

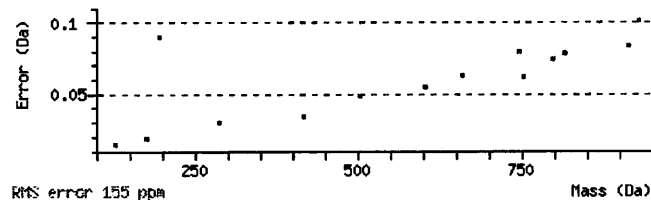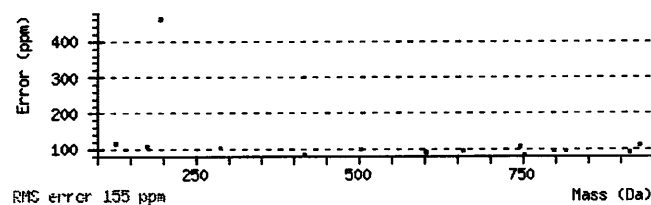



NCBI BLAST search of QLSSGVSEIR

(Parameters: blastp, nr protein database, expect=20000, no filter, PAM30)

Other BLAST [web gateways](#)

## All matches to this query

| Score | Mr(calc): | Delta  | Sequence   |
|-------|-----------|--------|------------|
| 70.5  | 1154.5332 | 0.0954 | QLSSGVSEIR |
| 55.5  | 1154.5332 | 0.0954 | QLSSGVSEIR |
| 39.6  | 1154.5332 | 0.0954 | QLSSGVSEIR |
| 18.5  | 1154.5696 | 0.0590 | KISTTQIER  |
| 11.0  | 1154.5882 | 0.0404 | LQSMLSKIR  |
| 10.9  | 1154.4969 | 0.1318 | QVTEPTSSAR |
| 10.8  | 1154.5883 | 0.0404 | KICVTVSLR  |
| 10.8  | 1154.5883 | 0.0404 | KICVTVSLR  |
| 10.3  | 1154.4605 | 0.1682 | QLSEEQDAR  |
| 10.0  | 1154.5696 | 0.0590 | KISTTQIER  |

**Mascot:** <http://www.matrixscience.com/>
